# Supplementary material for: A skin cancer prevention photoageing intervention for secondary schools in Brazil delivered by medical students: protocol for a randomised controlled trial
Source: PubMed Central journal article supplement — BMJ Open. 2018 Mar 6;8(3):e018299. doi: 10.1136/bmjopen-2017-018299 (PMC5855446; doi:10.1136/bmjopen-2017-018299), 2018-03-06
Supplement: bmjopen-2017-018299.draft_revisions.pdf [file bmjopen-2017-018299.draft_revisions.pdf]

# BMJ Open

BMJ Open is committed to open peer review. As part of this commitment we make the peer review history of every article we publish publicly available.

When an article is published we post the peer reviewers' comments and the authors' responses online. We also post the versions of the paper that were used during peer review. These are the versions that the peer review comments apply to.

The versions of the paper that follow are the versions that were submitted during the peer review process. They are not the versions of record or the final published versions. They should not be cited or distributed as the published version of this manuscript.

BMJ Open is an open access journal and the full, final, typeset and author-corrected version of record of the manuscript is available on our site with no access controls, subscription charges or pay-per-view fees (<http://bmjopen.bmj.com>).

If you have any questions on BMJ Open's open peer review process please email [editorial.bmjopen@bmj.com](mailto:editorial.bmjopen@bmj.com)

# BMJ Open

## A skin cancer prevention photoaging intervention for secondary schools in Brazil delivered by medical students: randomized controlled trial – study protocol

|                               |                                                                                                                                                                                                                                                                                                                                                                                                                                                                                                                                                                                                                                                                                                                                                                                                                                                                                                                                                                                                                                                                                                                                                                                                                                                                                                                                                                                                                                                                                                       |
|-------------------------------|-------------------------------------------------------------------------------------------------------------------------------------------------------------------------------------------------------------------------------------------------------------------------------------------------------------------------------------------------------------------------------------------------------------------------------------------------------------------------------------------------------------------------------------------------------------------------------------------------------------------------------------------------------------------------------------------------------------------------------------------------------------------------------------------------------------------------------------------------------------------------------------------------------------------------------------------------------------------------------------------------------------------------------------------------------------------------------------------------------------------------------------------------------------------------------------------------------------------------------------------------------------------------------------------------------------------------------------------------------------------------------------------------------------------------------------------------------------------------------------------------------|
| Journal:                      | <i>BMJ Open</i>                                                                                                                                                                                                                                                                                                                                                                                                                                                                                                                                                                                                                                                                                                                                                                                                                                                                                                                                                                                                                                                                                                                                                                                                                                                                                                                                                                                                                                                                                       |
| Manuscript ID                 | bmjopen-2017-018299                                                                                                                                                                                                                                                                                                                                                                                                                                                                                                                                                                                                                                                                                                                                                                                                                                                                                                                                                                                                                                                                                                                                                                                                                                                                                                                                                                                                                                                                                   |
| Article Type:                 | Protocol                                                                                                                                                                                                                                                                                                                                                                                                                                                                                                                                                                                                                                                                                                                                                                                                                                                                                                                                                                                                                                                                                                                                                                                                                                                                                                                                                                                                                                                                                              |
| Date Submitted by the Author: | 17-Jun-2017                                                                                                                                                                                                                                                                                                                                                                                                                                                                                                                                                                                                                                                                                                                                                                                                                                                                                                                                                                                                                                                                                                                                                                                                                                                                                                                                                                                                                                                                                           |
| Complete List of Authors:     | <p>Brinker, Titus; Universitat Duisburg-Essen, Department of Dermatology, Venerology and Allergology; Universitat Duisburg-Essen, West German Cancer Center</p> <p>Faria, Bianca; University of Itauna, 35680-142 Itauna, Brazil, School of Medicine</p> <p>Izar, Benjamin; Dana-Farber Cancer Institute, Department of Medical Oncology</p> <p>de Faria, Olber; Universidade de Itauna, School of Medicine</p> <p>Klode, Joachim; University Hospital Essen, University Duisburg-Essen, Essen, Germany, Department of Dermatology, Venerology and Allergology; Universitat Duisburg-Essen, West German Cancer Center</p> <p>Schadendorf, Dirk; University Hospital Essen, University Duisburg-Essen, Essen, Germany, Department of Dermatology, Venerology and Allergology; Universitat Duisburg-Essen, West German Cancer Center</p> <p>Stoffels, Ingo; Universitat Duisburg-Essen, Department of Dermatology, Venerology and Allergology; Universitat Duisburg-Essen, West German Cancer Center</p> <p>Jansen, Philipp; Universitat Duisburg-Essen, Department of Dermatology, Venerology and Allergology; Universitat Duisburg-Essen, West German Cancer Center</p> <p>Lisboa, Oscar; Universidade Federal de Ouro Preto, School of Medicine</p> <p>Oliveira, Ana; Universidade de Itauna, School of Medicine</p> <p>Lino, Henrique; University of Itauna, 35680-142 Itauna, Brazil, School of Medicine</p> <p>Bernardes-Souza, Breno; Universidade Federal de Ouro Preto, School of Medicine</p> |
| Keywords:                     | PUBLIC HEALTH, DERMATOLOGY, PREVENTIVE MEDICINE                                                                                                                                                                                                                                                                                                                                                                                                                                                                                                                                                                                                                                                                                                                                                                                                                                                                                                                                                                                                                                                                                                                                                                                                                                                                                                                                                                                                                                                       |

SCHOLARONE™  
Manuscripts

1  
2  
3 **A skin cancer prevention photoaging intervention for secondary schools in**  
4 **Brazil delivered by medical students: randomized controlled trial – study**  
5 **protocol**  
6  
7  
8  
9

10  
11 Titus J. Brinker<sup>1,2\*</sup>, Bianca Lisa Faria<sup>3</sup>, Benjamin Izar<sup>4,5</sup>, Olber Moreira de Faria<sup>4</sup>,  
12  
13 Joachim Klode<sup>1,2</sup>, Dirk Schadendorf<sup>1,2</sup>, Ingo Stoffels<sup>1,2</sup>, Philipp Jansen<sup>1,2</sup>, Fabian  
14  
15 Buslaff<sup>1,2,3</sup>, Oscar Campos Lisboa<sup>6</sup>, Ana Carla Cruz Oliveira<sup>3</sup>, Henrique Augusto  
16  
17 Lino<sup>3</sup>, Breno Bernardes-Souza<sup>6</sup>  
18  
19  
20  
21

- 22 1. Department of Dermatology, Venerology and Allergology, University-Hospital  
23 Essen, University of Duisburg-Essen, 45122 Essen, Germany
- 24 2. West German Cancer Center, University Duisburg-Essen, 45122 Essen,  
25  
26 Germany
- 27 3. School of Medicine, University of Itauna, 35680-142 Itauna, Brazil
- 28  
29 4. Department of Medical Oncology, Dana-Farber Cancer Institute, Boston,  
30  
31 Massachusetts
- 32 5. Harvard Medical School, Boston, MA
- 33  
34 6. School of Medicine, Federal University of Ouro Preto, 35400-000 Ouro Preto,  
35  
36 Brazil
- 37  
38  
39  
40  
41  
42  
43  
44  
45  
46

47 \* Address for correspondence: Titus J. Brinker, Department of Dermatology,  
48 Venerology and Allergology, University-Hospital Essen, University of Duisburg-Essen,  
49 45122 Essen, Germany; E-mail: titus.brinker@gmail.com; Telephone number:  
50  
51 +4915175084347  
52  
53  
54  
55  
56  
57  
58  
59  
60

1  
2  
3 **E-Mails:** titus.brinker@gmail.com (TJB), biancalisadefaria@outlook.com (BLF),  
4 bizar@partners.org (BI), olbermoreira@uol.com.br (OMF), Joachim.Klode@uk-  
5 essen.de (JK), Dirk.Schadendorf@uk-essen.de (DS), Ingo.Stoffels@uk-essen.de (IS),  
6  
7 Philipp.Jansen@uk-essen.de (PJ), oscarlisboa17@gmail.com (OCL),  
8  
9 anacarlaco@outlook.com (ACCO), henriquelino@live.co.uk (HAL),  
10  
11 brenoneps@gmail.com (BBS)  
12  
13  
14  
15  
16  
17  
18  
19  
20  
21  
22  
23  
24  
25  
26  
27  
28  
29  
30  
31  
32  
33  
34  
35  
36  
37  
38  
39  
40  
41  
42  
43  
44  
45  
46  
47  
48  
49  
50  
51  
52  
53  
54  
55  
56  
57  
58  
59  
60

## ABSTRACT

### Introduction

The incidence of melanoma is increasing faster than any other major cancer both in Brazil and worldwide. Especially the Southeast of Brazil has high incidences of melanoma and early detection is comparably low. A main risk factor for developing melanoma is exposure to UV radiation. To increase attractiveness is a major motivation for unhealthy tanning behavior in adolescents. A medical-student delivered intervention that harnesses the broad availability of mobile phones as well as adolescents' interest in their appearance may be a novel way to improve skin cancer prevention.

### Methods and Analysis

We developed a free mobile app ("Sunface") which will be implemented in at least 30 secondary school classes with 21 subjects (at least 30 classes with 21 subjects for control) in February 2018 in the city of Itauna (Southeast Brazil) via a novel method called mirroring. In a 45 minutes classroom seminar, the students' altered three-dimensional selfies on tablets are "mirrored" via a projector in front of their whole class showing the effects of unprotected UV exposure on their own future faces. External block randomization via computer is performed on the class level with a 1:1 allocation. In addition to sociodemographic data, skin type, ancestry, UV protection behavior and its predictors are measured via a paper-pencil questionnaire before, three and six months post-intervention. The primary endpoint is the difference in the 30-day-prevalence of daily sunscreen use between both groups at six months follow-up. Secondary endpoints include the difference of daily sunscreen use at three months follow-up, if a self-skin exam in accordance with the ABCDE rule was

1  
2 performed within the six months follow-up and other measures of sun protection  
3  
4 behavior.  
5  
6  
7

8 **Ethics and dissemination:** Ethical approval is obtained from the ethics committee of  
9  
10 the University of Ituna. Results are disseminated at conferences and in peer-  
11  
12 reviewed journals.  
13  
14

15 **Trial Registration:** #NCT03178240  
16  
17  
18  
19  
20  
21  
22  
23  
24  
25  
26  
27  
28  
29  
30  
31  
32  
33  
34  
35  
36  
37  
38  
39  
40  
41  
42  
43  
44  
45  
46  
47  
48  
49  
50  
51  
52  
53  
54  
55  
56  
57  
58  
59  
60

## Strengths and limitations of this study

- This is the first randomized controlled trial on school-based skin cancer prevention in Brazil.
- This is the first randomized controlled trial on a photoaging app in the field of skin cancer prevention.
- Sensitizing prospective physicians for the importance of skin cancer prevention is mandatory.
- For the reason that intervention and control classes are located in the same schools, cluster effects can not be excluded entirely.

## Introduction

According to the World Health Organization, the incidence of melanoma is increasing faster than any other major cancer both in Brazil and worldwide. Melanoma is the most common cancer in young adults, posing a substantial health and economic burden [1].

About 90% of melanomas are associated with UV exposure, in particular with the frequency of severe sun burns, and are therefore eminently preventable [2]. Multiple studies were able to show that daily sunscreen use with a sun protection factor (SPF) above 30, as recommended by international dermatology guidelines, may prevent sunburns and skin cancer, including melanoma [3-6]. Interventions aiming at encouraging sun protection habits are important particularly among adolescents, as increased risk of skin cancer is associated with cumulative UV exposure and with sunburns early in life [7-9]. In line with this association, various recent experimental

1  
2  
3 studies designed to test these effects in young target groups aimed at promoting  
4 sunscreen use as an end point [10-13] and others used different UV protection  
5 behaviors (including avoiding sunbeds) or behavior scores [14-23]. Given the  
6  
7 substantial amount of time children and adolescents spend in the school  
8 environment, addressing skin cancer prevention in this setting is crucial and provides  
9 a unique opportunity to propel skin cancer prevention programs [24].  
10  
11  
12  
13  
14  
15

16  
17 Although Brazil has one of the highest UV indexes on earth, tanning is culturally  
18 established and Brazilians are used to unprotected overexposure to sun, especially  
19 in childhood and teenage years [25-29]. In a population-based survey with 1.604  
20 participants in the south of Brazil from 2008, 48.7% reported at least one sunburn in  
21 the prior year [28]. In an attempt to mitigate the health damage caused by excessive  
22 UV-exposure, Brazil was the first country to forbid indoor tanning in 2009, albeit with  
23 limited success [27]. Especially the southeast of Brazil (the location of this study) is  
24 populated by citizens with a European ethnicity and therefore has high incidences of  
25 melanoma (up to 23.5/100,000 inhabitants) with a lack of early diagnosis and an  
26 overall survival below the worldwide rates [30-33].  
27  
28  
29  
30  
31  
32  
33  
34  
35  
36  
37  
38

39  
40 Despite the effectiveness of daily sunscreen and its implementation in international  
41 dermatologic guidelines [34], a study conducted in Brazil among 398 medical  
42 students from the city of Curitiba showed that only 8.4% use sunscreen daily, 4.3%  
43 had already used tanning beds and 85.5% had already had sunburns in the past  
44 despite having undergone a clinical rotation in a Dermatology department [26]. The  
45 issue of a lack of exemplary behavior among prospective physicians regarding skin  
46 cancer prevention is known on a global scale [35-37]. The authors conclude that  
47 novel ways of engagement are needed to answer the increasing demand for skin  
48 cancer awareness among physicians.  
49  
50  
51  
52  
53  
54  
55  
56  
57  
58  
59  
60



1  
2  
3 The Sunface mirroring intervention aims at both: providing science-based skin cancer  
4 prevention to a large number of adolescents and by this means sensitizing  
5 prospective physicians for the importance of exemplary behavior [38, 39].  
6  
7  
8  
9

### 10 11 *Current knowledge on school-based skin cancer prevention* 12

13  
14 A recent randomized trial with Australian high school students demonstrated that  
15 appearance-based videos on UV-induced premature aging were superior in  
16 encouraging sunscreen use to videos of the same length focussing on health aspects  
17 exclusively [10]. These findings are in line with international studies demonstrating  
18 the important influence of self-perceived attractiveness on self-esteem in  
19 adolescence [40, 41]. Furthermore, enhancing ones attractiveness is a main  
20 motivation for tanning in adolescents both in Brazil and worldwide [42-44]. In addition,  
21 the success of appearance-based photoaging interventions, in which an image is  
22 altered to predict future appearance in the fields of tobacco and adiposity prevention  
23 shows promise of these interventions in behavioral change settings [45-49].  
24  
25  
26  
27  
28  
29  
30  
31  
32  
33  
34  
35

36 In the setting of skin cancer prevention, a quasi-experimental study by Williams et al.  
37 demonstrated significant higher scores for predictors of sun protection behavior in  
38 young females from the UK (average age=23,7; SD=5,03; 70 participants in total) by  
39 means of a photoaging desktop program [50]. Furthermore, the photoaging software  
40 has been shown to be effective in changing young adults' sun-tanning intentions in  
41 both genders in a study with ten participants in total (7 female and 3 male) [51].  
42  
43  
44  
45  
46  
47  
48

49 However, prior studies are limited by a small sample size and limitations of  
50 expanding the target population.  
51  
52  
53  
54  
55  
56  
57  
58  
59  
60

## Introduction of the Sunface App

We harnessed the widespread availability of mobile phones and adolescents' interest in appearance to develop the free mobile phone app "Sunface" which lets the user take a selfie and then offers three categories: "daily sun protection", "no sun protection" and "weekly sunbed" showing the altered face 5-25 years in the future (1-4). All effects are based on the individual skin type the user can choose at the start of the app (Fig. 5). The app also shows the most common UV-induced skin cancers via extra buttons and calculates how the odds ratio is increased with different behaviors. In addition, the app gives advice on sun protection, explains the facial

<Figure 1-4 provided as additional files>

<Figure 5 provided as additional file>

Afterwards, the app offers many sharing options (animated video or photo) with family and friends. By this means, the social network of the user may also be informed about the various photoaging effects of excessive UV-exposure, potential health consequences, and learn about the app.

In order to produce realistic effects (Fig. 6) and to show the user realistic odds ratios for the options they choose in the app for the three most strongly associated skin pathologies, an extensive review of the current literature on UV-induced skin-damage [52, 53] was conducted for each specific skin type. As no trials with 25 years of follow-up were available, we had to extrapolate the current evidence on UV-induced skin damage for the specific skin types.

<Figure 6 provided as additional file>

1  
2  
3  
4  
5  
6  
7  
8 This randomized trial was designed to answer the following main questions:  
9

10  
11 Is the implementation of the app in secondary schools in southeastern Brazil effective  
12  
13 in encouraging daily sunscreen use among adolescents? Is it equally effective for  
14  
15 both genders? Is it effective for the most sensitive skin types? How does the app-  
16  
17 intervention change the attitudes towards sun protection in accordance with the  
18  
19 theory of planned behaviour [54]?  
20  
21  
22  
23

## 24 Methods and Analysis

### 25 26 27 Trial Design

28  
29  
30  
31 The Sunface trial is designed as a randomised, controlled superiority trial with two  
32  
33 parallel groups and our primary end point is the difference in daily sunscreen use  
34  
35 (past 30 days) from baseline to six months follow-up compared between the two  
36  
37 groups (Fig. 7). The planned study period is February 2018 to November 2018. The  
38  
39 study groups will consist of randomized classes receiving the intervention and control  
40  
41 classes within the same schools (no intervention). Randomization is externally and  
42  
43 centrally performed at school level with a 1:1 allocation (control:intervention) via  
44  
45 computer [12]. A total of at least 60 secondary school classes in Itauna, Brazil  
46  
47 participate in the teacher-conducted baseline survey in February 2018. Immediately  
48  
49 after the baseline survey, the intervention classes receive a 45 minutes lasting app-  
50  
51 based intervention conducted by local volunteering medical students. Follow-up  
52  
53 surveys are conducted 3 and 6 months post-intervention.  
54  
55  
56  
57  
58  
59  
60

1  
2  
3 <Figure 7 provided as an additional file>  
4  
5

## 6 Intervention

7  
8 The school-based intervention under evaluation consists of a 45-minute module in  
9 the classroom setting. It is presented by 2 medical students per classroom to about  
10 21 students at a time. The goal is to initiate and guide the student evaluation process  
11 of skin cancer prevention with age-appropriate information that helps them to reframe  
12 positive opinions and views regarding sun protection habits in a gain-framed and  
13 interactive manner.  
14

15 To integrate app-based photoaging interventions into the school-based setting, we  
16 previously developed and tested the mirroring approach in a pilot study [46].  
17

18 Mirroring means that the students' altered three-dimensional selfies on smartphones  
19 or tablets are "mirrored" via a projector in front of the whole class. The mirroring  
20 approach is implemented by volunteering medical students from the University of  
21 Itauna who receive a standardized training in advance. To ensure the participation of  
22 all students within a certain class and to avoid contamination within schools, we  
23 implement the mirroring intervention via 10 Samsung Galaxy Tablets that are already  
24 set up and brought to the schools by the volunteers.  
25  
26  
27  
28  
29  
30  
31  
32  
33  
34  
35  
36  
37  
38  
39  
40  
41  
42

43 In the first 10-minute phase, the displayed face of one student volunteer is used to  
44 show the app's altering features in the three categories to the peer group, providing  
45 an incentive for the rest of the class to test the app. Students can interact with their  
46 own animated face via touch (sneezing, coughing, etc.; see Multimedia Appendix 1).  
47

48 In front of their peers, they could display their image as a non-/sun protection  
49 user/weekly tanning bed user 5, 10, 15, 20 and 25 years in the future (see Figures 1a  
50 and 2). Multiple device displays can be projected simultaneously, which are used to  
51  
52  
53  
54  
55  
56  
57  
58  
59  
60

1  
2  
3 consolidate the altering measures with graphics (eg, to explain wrinkle formation).

4 We implement mirroring with Galaxy Tab A (Samsung) via Apple's proprietary  
5 AirPlay interface using the Android app "Mirroring360" (Splashtop Inc.).  
6  
7  
8  
9

10  
11 <Multimedia Appendix 1 uploaded as an additional file>  
12  
13

14  
15 In the second 15-minute phase, students are encouraged to try the app on one of the  
16 tablet computers. The number of provided tablet computers was calculated so the  
17 phase would take up to 12 minutes at the most, factoring in a utilization time of about  
18 4 minutes per student. By this calculation, 25 minutes of the mirroring intervention  
19 and 10 provided tablets were sufficient to have every student within a class of 40  
20 pupils successfully photoaged at least once.  
21  
22  
23  
24  
25  
26  
27

28 In the following 15 minutes, the remaining functions of the app are discussed with the  
29 students: Facial changes, the ABCDE rule and the guidelines for sun protection are  
30 addressed in an interactive setting. At the end of the classroom seminar we ask for  
31 the students' final judgments on daily sunscreen use to create positive peer pressure  
32 and influence the students' subjective norm in accordance with the theory of planned  
33 behavior [54].  
34  
35  
36  
37  
38  
39  
40

41 In the last 5 minutes, the perception of the intervention by the students is measured  
42 directly after the intervention via four items in an anonymous survey on 5-point-Likert  
43 scales (1) "The animation of my 3D-selfie motivates me to use daily sunscreen," (2) "I  
44 learned new benefits of sun protection", (3) "The intervention motivates me to check  
45 my skin with the ABCDE rule in the next six months" and (4) "The intervention was  
46 fun."  
47  
48  
49  
50  
51  
52  
53  
54  
55  
56  
57  
58  
59  
60

## Participants

### ***Eligibility criteria at baseline***

Students from Itauna in southeast Brazil attending grades 6 to 12 in all types of regular secondary school are eligible.

### ***Contaminated classes***

All classes will be included in the final intention-to-treat analysis. However, app use will be assessed in both groups at six months follow-up to assess contamination of control classes and will be the basis for a secondary (sensitivity) analysis with the methods described in the Analysis section of this protocol.

## Procedure

Data are collected via a paper-pencil questionnaire. In addition to sociodemographic data (age, gender and school type), the questionnaire captures the Fitzpatrick skin type, the ancestry of the school students [55] and the frequency of sunscreen use in the past 30 days as well as other sun protection behaviors. These items are based on the sun exposure and protection index (SEPI) questionnaire [56] and were either used in their original form or adapted to the specific circumstances of the present study. Since no Portuguese equivalents of the instruments were available, we used the Conceptual Method for translation described by the WHO/UNESCAP Project on Health and Disability Statistics[57]. Newly translated and/or modified items were extensively pretested and subjected to statistical analyses (internal consistency/Cronbach's  $\alpha$ , exploratory and confirmatory factor analyses, which represented the basis for item selection).

## Data Collection

Each data collector received training for data collection and was required to use an adapted standardised protocol for data collection, an optimized version of the one used in the Smokerface randomized trial [58].

## Cluster-randomisation

In accordance with the guidelines for good epidemiologic practice (GEP guideline) classes within schools are externally and centrally randomly assigned to the control or intervention group via block-randomization in a ratio of 1:1 (control:intervention) via computer by a statistician at the University of Duisburg-Essen, Germany.

Stratification will be performed per grade.

## Outcomes

The primary endpoint is the difference in the 30-day-prevalence of daily sunscreen use between both groups at six months follow-up. Secondary endpoints include the difference of daily sunscreen use at three months follow-up, if a self-skin exam in accordance with the ABCDE rule was performed within the six months follow-up and other measures of sun protection behavior. For all end points, the number needed to treat (NNT) will be calculated in addition. A daily sunscreen user is defined as a pupil who claims to have used sunscreen daily in the 30 days preceding the survey.

## Statistical considerations

### *Sample size calculation*

1  
2  
3 We calculated sample sizes of 630 in the intervention group and 630 in the control  
4 group, which were obtained by sampling 30 classes with 21 students each in the  
5 intervention group and 30 classes with 21 students each in the control group to  
6 achieve 80% power to detect a prevalence difference between the groups of 5%. The  
7 daily sunscreen prevalence was assumed to be 6% under the null hypothesis  
8 and 11% under the alternative hypothesis based on a small pilot survey with 150  
9 students in Itauna. The test statistic used is the two-sided score test (Farrington &  
10 Manning). The significance level of the test is 0,05. Normal class size in Brazil is 35  
11 pupils and thus, a loss-to-follow-up effect of 40% was taken into account.  
12  
13  
14  
15  
16  
17  
18  
19  
20  
21  
22  
23

#### 24 *Data entry*

25  
26 Data entry is supported by the current software version of Formic Fusion by the  
27 Xerox AG (Kloten, Switzerland) and recommended scanners.  
28  
29  
30  
31  
32

#### 33 *Analysis*

34  
35 To examine baseline differences in pupils' characteristics in our experimental design,  
36 we will use  $\chi^2$  tests for the categorical variables and t-tests for continuous variables.  
37  
38 To test for differences in baseline and follow-up smoking prevalence between groups,  
39 we will use a cluster-adjusted Mantel-Haenszel  $\chi^2$  test[59] at a significance level of  
40 5% (two-sided). For the main analysis, HLM (hierarchical linear models) will be  
41 applied. HLM can handle the nested structure of the data and will be used to test for  
42 between-group differences in within-group changes in sun protection behaviour over  
43 time. HLM will also be used to investigate the influence of further covariates (such as  
44 gender, European ancestry and skin type) and time-dependent behaviour in  
45 secondary analyses. Statistical analyses will be performed using the newest version  
46 of SPSS Statistics (IBM Corporation, New York, USA).  
47  
48  
49  
50  
51  
52  
53  
54  
55  
56  
57  
58  
59  
60



1  
2  
3 The effect that missing data might have on results will be assessed via sensitivity  
4 analysis. Dropouts (essentially participants who withdraw consent for continued  
5 follow-up or who are missing in the classroom during the survey) will be included in  
6 the analysis by modern imputation methods for missing data and multiple imputation  
7 will be used to estimate treatment effect [60].  
8  
9  
10  
11  
12  
13  
14  
15

## 16 Discussion

17  
18  
19 This is the first cluster-randomized school-based trial on photoaging skin cancer  
20 prevention and the first trial on medical student-delivered school-based skin cancer  
21 prevention worldwide. While classic health educational school-based approaches in  
22 skin cancer prevention were evaluated as inferior to appearance-based approaches  
23 [10], there is a global lack of novel, innovative strategies that harness the available  
24 technology in the internet-age while taking widely accepted theories for behavioral  
25 change into account [54]. Although multiple studies were able to show that skin  
26 cancer risk is predominantly associated with sun exposure early in life, there is a lack  
27 of awareness in risk groups. In southeastern Brazil specifically, there is a high  
28 incidence of melanoma and the early detection is below the worldwide rates [31]. At  
29 the same time, there are no randomized trials on skin cancer prevention on PubMed  
30 that were implemented in Brazil.  
31  
32  
33  
34  
35  
36  
37  
38  
39  
40  
41  
42  
43  
44  
45

46 Thus, this trial provides the opportunity to evaluate an innovative, highly scalable,  
47 appearance-based intervention in a high risk population and provide data to estimate  
48 whether photoaging mobile apps have the potential to be broadly implemented in  
49 schools via the mirroring intervention but also via other vectors (i.e. posters [58] or  
50 smartphone based advertising campaigns in Appstore and Playstore) or could be a  
51 valuable addition to existing educational programs. Besides that, as it is medical-  
52  
53  
54  
55  
56  
57  
58  
59  
60

1  
2  
3 student delivered, this trial also sensitizes future physicians to the importance of skin  
4 cancer prevention, highlighting their associated responsibilities within communities  
5 [35, 61].  
6  
7  
8  
9

10 According to the theory of planned behavior (TPB), the subjective norm and the  
11 expected self-efficacy of the participants play a substantial role in their resulting  
12 behavior: What do their peers think about tanning? Is the result of tanning regarded  
13 as attractive and does it therefore increase ones chances to find a boy-/girlfriend?  
14 How likely is it that own behavioral change can influence this reaction positively? The  
15 mirroring intervention triggers strong reactions of the peer-group of the individual  
16 participant towards their photoaged future self (=affecting subjective norm) but also  
17 illustrates the power of own behavioral change (and thereby increases ones  
18 expectation of self-efficacy, another predictor of the TPB) to influence this reaction by  
19 the peers [46].  
20  
21  
22  
23  
24  
25  
26  
27  
28  
29  
30  
31  
32

### 33 *Limitations*

34  
35  
36 Since this study is conducted only in Brazil, results might not be generalisable to  
37 other cultural or national settings. However, the theoretical basis for this intervention,  
38 the theory of planned behavior has been proven to apply to most cultural contexts  
39 around the globe [54]. As this trial is enrolled in about 10 different public schools total  
40 it should be representable for most school types.  
41  
42  
43  
44  
45  
46  
47

48 As we have to choose classes but not schools as a cluster due to sample size  
49 limitations, cluster-effects can not be excluded entirely. However, multiple steps are  
50 taken to limit contamination between control and intervention classes (i.e. the name  
51 of the App is not mentioned to the pupils by the trained medical students and the  
52 teachers of the control classes are strictly prohibited to talk about the intervention  
53  
54  
55  
56  
57  
58  
59  
60

1  
2  
3 with their students). Cluster-effects are also monitored in the endline questionnaire  
4  
5 and provide basis for a sensitivity analysis.  
6  
7

## 8 Conclusion

9

10  
11 In summary, we present a novel way of integrating photoaging in school-based skin  
12  
13 cancer prevention in a population with high risk for developing skin cancer, which  
14  
15 affects the students' peer group and considers the predictors of tanning in  
16  
17 accordance with the theory of planned behavior. Our study is the first randomized  
18  
19 controlled trial on skin cancer prevention in Brazil and the first randomized trial on a  
20  
21 medical student-delivered app- and school-based skin cancer prevention strategy in  
22  
23 general.  
24  
25

## 26 Dissemination

27

28  
29 All legal and data protection issues were discussed with the responsible authorities,  
30  
31 and participants are required to provide informed consent. All participant information  
32  
33 will be stored in locked file cabinets in areas with limited access. Participants' study  
34  
35 information will not be released outside of the study without the written permission of  
36  
37 the participant. Results will be disseminated at national and international conferences  
38  
39 and in peer-reviewed journals.  
40  
41  
42  
43  
44  
45  
46  
47

## 48 Acknowledgements

49

50  
51 The authors would like to thank all participating schools, students, volunteering  
52  
53 medical students and teachers who helped to organize the classroom visits in the city  
54  
55 of Itauna.  
56  
57  
58  
59  
60

## Authors' Contributions

TJB initiated the study, invented, designed and organized the intervention, wrote the manuscript, drafted the design of the study and performs the statistical analyses.

BBS participated in the conception of the study. JK, PJ, IS, BI, FB and DS contributed to the design of the study and analyses of data, and proofread the manuscript. BBS and OCL contributed to the design and logistics of the study, assisted with the translation of classroom materials, and reviewed the final version of the manuscript. BLF, OMF, HAL, ACCO conduct data entry and coordinate/conduct the intervention in Brazil, supported the translation of the classroom materials, and proofread the manuscript.

## Conflicts of Interest

None declared.

1. Livingstone E, Windemuth-Kieselbach C, Eigentler TK, Rompel R, Trefzer U, Nashan D, Rotterdam S, Ugurel S, Schadendorf D: **A first prospective population-based analysis investigating the actual practice of melanoma diagnosis, treatment and follow-up.** *European journal of cancer* 2011, **47**(13):1977-1989.
2. The L: **Skin cancer: prevention is better than cure.** *The Lancet*, **384**(9942):470.
3. Green AC, Williams GM, Logan V, Strutton GM: **Reduced melanoma after regular sunscreen use: randomized trial follow-up.** *Journal of Clinical Oncology* 2010, **29**(3):257-263.
4. Ghiasvand R, Weiderpass E, Green AC, Lund E, Veierød MB: **Sunscreen use and subsequent melanoma risk: A population-based cohort study.** *Journal of Clinical Oncology* 2016, **34**(33):3976-3983.
5. Nijsten T: **Sunscreen Use in the Prevention of Melanoma: Common Sense Rules.** In: American Society of Clinical Oncology; 2016.
6. Ou-Yang H, Jiang LI, Meyer K, Wang SQ, Farberg AS, Rigel DS: **Sun Protection by Beach Umbrella vs Sunscreen With a High Sun Protection Factor: A Randomized Clinical Trial.** *JAMA dermatology* 2017, **153**(3):304-308.

- 1
  - 2
  - 3
  - 4
  - 5
  - 6
  - 7
  - 8
  - 9
  - 10
  - 11
  - 12
  - 13
  - 14
  - 15
  - 16
  - 17
  - 18
  - 19
  - 20
  - 21
  - 22
  - 23
  - 24
  - 25
  - 26
  - 27
  - 28
  - 29
  - 30
  - 31
  - 32
  - 33
  - 34
  - 35
  - 36
  - 37
  - 38
  - 39
  - 40
  - 41
  - 42
  - 43
  - 44
  - 45
  - 46
  - 47
  - 48
  - 49
  - 50
  - 51
  - 52
  - 53
  - 54
  - 55
  - 56
  - 57
  - 58
  - 59
  - 60
7. Lo JA, Fisher DE: **The melanoma revolution: from UV carcinogenesis to a new era in therapeutics.** *Science* 2014, **346**(6212):945-949.
8. Wu S, Han J, Laden F, Qureshi AA: **Long-term ultraviolet flux, other potential risk factors, and skin cancer risk: a cohort study.** *Cancer Epidemiology and Prevention Biomarkers* 2014, **23**(6):1080-1089.
9. Barton MK: **Indoor tanning increases melanoma risk, even in the absence of a sunburn.** *CA: a cancer journal for clinicians* 2014, **64**(6):367-368.
10. Tuong W, Armstrong AW: **Effect of appearance-based education compared with health-based education on sunscreen use and knowledge: a randomized controlled trial.** *Journal of the American Academy of Dermatology* 2014, **70**(4):665-669.
11. Craciun C, Schüz N, Lippke S, Schwarzer R: **Facilitating sunscreen use in women by a theory-based online intervention: A randomized controlled trial.** *Journal of health psychology* 2012, **17**(2):207-216.
12. Hirst NG, Gordon LG, Scuffham PA, Green AC: **Lifetime cost-effectiveness of skin cancer prevention through promotion of daily sunscreen use.** *Value in Health* 2012, **15**(2):261-268.
13. Sakoufaki M, Stergiopoulou A, Stratigos A: **Design and implementation of a health promotion program to prevent the harmful effects of ultraviolet radiation at primary school students of rural areas of Greece.** *International Journal of Research in Dermatology* 2017.
14. Miller K, Langholz B, Ly T, Harris S, Richardson J, Peng D, Cockburn M: **SunSmart: evaluation of a pilot school-based sun protection intervention in Hispanic early adolescents.** *Health education research* 2015:cyv011.
15. Aarestrup C, Bonnesen CT, Thygesen LC, Krarup AF, Waagstein AB, Jensen PD, Bentzen J: **The effect of a school-based intervention on sunbed use in Danish pupils at continuation schools: a cluster-randomized controlled trial.** *Journal of Adolescent Health* 2014, **54**(2):214-220.
16. Holman DM, Fox KA, Glenn JD, Guy GP, Watson M, Baker K, Cokkinides V, Gottlieb M, Lazovich D, Perna FM: **Strategies to reduce indoor tanning: current research gaps and future opportunities for prevention.** *American journal of preventive medicine* 2013, **44**(6):672-681.
17. Hillhouse J, Turrisi R, Scaglione NM, Cleveland MJ, Baker K, Florence LC: **A Web-Based Intervention to Reduce Indoor Tanning Motivations in Adolescents: a Randomized Controlled Trial.** *Prevention Science* 2016:1-10.
18. Stapleton JL, Hillhouse J, Levonyan-Radloff K, Manne SL: **Review of Interventions to Reduce Ultraviolet Tanning: Need for Treatments Targeting Excessive Tanning, An Emerging Addictive Behavior.** 2017.
19. Olson AL, Gaffney C, Starr P, Gibson JJ, Cole BF, Dietrich AJ: **SunSafe in the middle school years: a community-wide intervention to change early-adolescent sun protection.** *Pediatrics* 2007, **119**(1):e247-e256.
20. Miller KA, Huh J, Unger JB, Richardson JL, Allen MW, Peng DH, Cockburn MG: **Patterns of sun protective behaviors among Hispanic children in a skin cancer prevention intervention.** *Preventive medicine* 2015, **81**:303-308.
21. Turner D, Harrison SL, Buettner P, Nowak M: **Does being a "SunSmart School" influence hat-wearing compliance? An ecological study of hat-wearing rates at Australian primary schools in a region of high sun exposure.** *Preventive medicine* 2014, **60**:107-114.
22. Buller DB, Andersen PA, Walkosz BJ, Scott MD, Beck L, Cutter GR: **Rationale, design, samples, and baseline sun protection in a randomized trial on a skin**

- 1  
2  
3 **cancer prevention intervention in resort environments. *Contemporary*  
4 *clinical trials* 2016, **46**:67-76.**
- 5 23. Sontag JM, Noar SM: **Assessing the Potential Effectiveness of Pictorial**  
6 **Messages to Deter Young Women from Indoor Tanning: An Experimental**  
7 **Study. *Journal of Health Communication* 2017, **22**(4):294-303.**
- 8 24. Guy GP, Holman DM, Watson M: **The Important Role of Schools in the**  
9 **Prevention of Skin Cancer. *Jama dermatology* 2016, **152**(10):1083-1084.**
- 10 25. Benvenuto - Andrade C, Zen B, Fonseca G, Villa D, Cestari T: **Sun Exposure and**  
11 **Sun Protection Habits Among High - school Adolescents in Porto Alegre,**  
12 **Brazil. *Photochemistry and photobiology* 2005, **81**(3):630-635.**
- 13 26. Purim KSM, Wroblewski FC: **Sun exposure and protection among medical**  
14 **students in curitiba (PR). *Revista Brasileira de Educação Médica* 2014,  
15 **38**(4):477-485.**
- 16 27. Schalka S, Steiner D, Ravelli FN, Steiner T, Terena AC, Marçon CR, Ayres EL, Addor  
17 FASa, Miot HA, Ponzio H: **Brazilian consensus on photoprotection. *Anais*  
18 *brasileiros de dermatologia* 2014, **89**(6):1-74.**
- 19 28. Haack RL, Horta BL, Cesar JA: **Sunburn in young people: population-based**  
20 **study in Southern Brazil. *Revista de Saúde Pública* 2008, **42**(1):26-33.**
- 21 29. Silva AA: **Outdoor Exposure to Solar Ultraviolet Radiation and Legislation in**  
22 **Brazil. *Health physics* 2016, **110**(6):623-626.**
- 23 30. Lima ASd, Stein CE, Casemiro KP, Rovere RK: **Epidemiology of Melanoma in the**  
24 **South of Brazil: study of a city in the Vale do Itajaí from 1999 to 2013. *Anais*  
25 *brasileiros de dermatologia* 2015, **90**(2):185-189.**
- 26 31. de Lima Vazquez V, Silva TB, de Andrade Vieira M, de Oliveira ATT, Lisboa MV, de  
27 Andrade DAP, Fregnani JHTG, Carneseca EC: **Melanoma characteristics in**  
28 **Brazil: demographics, treatment, and survival analysis. *BMC research notes*  
29 2015, **8**(1):4.**
- 30 32. Amancio CT, Nascimento LFC: **Cutaneous melanoma in the State of São Paulo:**  
31 **a spatial approach. *Anais brasileiros de dermatologia* 2014, **89**(3):442-446.**
- 32 33. Naser N: **Cutaneous melanoma: a 30-year-long epidemiological study**  
33 **conducted in a city in southern Brazil, from 1980-2009. *Anais brasileiros de*  
34 *dermatologia* 2011, **86**(5):932-941.**
- 35 34. Farberg AS, Glazer AM, Rigel AC, White R, Rigel DS: **Dermatologists'**  
36 **Perceptions, Recommendations, and Use of Sunscreen. *Jama dermatology*  
37 2017, **153**(1):99-101.**
- 38 35. Isvy A, Beauchet A, Saiag P, Mahé E: **Medical students and sun prevention:**  
39 **knowledge and behaviours in France. *Journal of the European Academy of*  
40 *Dermatology and Venereology* 2013, **27**(2):e247-e251.**
- 41 36. Nanyes JE, McGrath JM, Krejci-Manwaring J: **Medical Students' Perceptions of**  
42 **Skin Cancer: Confusion and Disregard for Warnings and the Need for New**  
43 **Preventive Strategies. *Archives of dermatology* 2012, **148**(3):392-393.**
- 44 37. Patel SS, Nijhawan RI, Stechschulte S, Parmet Y, Rouhani P, Kirsner RS, Hu S: **Skin**  
45 **cancer awareness, attitude, and sun protection behavior among medical**  
46 **students at the University of Miami Miller School of Medicine. *Archives of*  
47 *dermatology* 2010, **146**(7):797-800.**
- 48 38. Brinker TJ, Stamm-Balderjahn S, Seeger W, Klingelhöfer D, Groneberg DA:  
49 **Education Against Tobacco (EAT): a quasi-experimental prospective**  
50 **evaluation of a multinational medical-student-delivered smoking**  
51 **prevention programme for secondary schools in Germany. *BMJ open* 2015,  
52 **5**(9):e008093.**



- 1  
2  
3 39. Brinker TJ, Stamm-Balderjahn S, Seeger W, Groneberg DA: **Education Against Tobacco (EAT): a quasi-experimental prospective evaluation of a programme for preventing smoking in secondary schools delivered by medical students: a study protocol.** *BMJ Open* 2014, **4**(7):e004909.
- 4  
5  
6 40. Baudson TG, Weber KE, Freund PA: **More Than Only Skin Deep: Appearance Self-Concept Predicts Most of Secondary School Students' Self-Esteem.** *Frontiers in psychology* 2016, **7**.
- 7  
8  
9 41. Wichstrøm L, von Soest T: **Reciprocal relations between body satisfaction and self-esteem: A large 13-year prospective study of adolescents.** *Journal of adolescence* 2016, **47**:16-27.
- 10  
11  
12 42. Bränström R, Kasparian NA, Chang Y-m, Affleck P, Tibben A, Aspinwall LG, Azizi E, Baron-Epel O, Battistuzzi L, Bergman W: **Predictors of sun protection behaviors and severe sunburn in an international online study.** *Cancer Epidemiology and Prevention Biomarkers* 2010, **19**(9):2199-2210.
- 13  
14  
15 43. Schneider S, Diehl K, Bock C, Schlüter M, Breitbart EW, Volkmer B, Greinert R: **Sunbed use, user characteristics, and motivations for tanning: results from the German population-based SUN-Study 2012.** *JAMA dermatology* 2013, **149**(1):43-49.
- 16  
17  
18 44. Görig T, Diehl K, Greinert R, Breitbart E, Schneider S: **Prevalence of sun - protective behavior and intentional sun tanning in German adolescents and adults: results of a nationwide telephone survey.** *Journal of the European Academy of Dermatology and Venereology* 2017.
- 19  
20  
21 45. Brinker TJ, Seeger W: **Photoaging Mobile Apps: A Novel Opportunity for Smoking Cessation?** *Journal of medical Internet research* 2015, **17**(7):e186.
- 22  
23  
24 46. Brinker TJ, Seeger W, Buslaff F: **Photoaging Mobile Apps in School-Based Tobacco Prevention: The Mirroring Approach.** *J Med Internet Res* 2016, **18**(6):e183.
- 25  
26  
27 47. Burford O, Jiwa M, Carter O, Parsons R, Hendrie D: **Internet-Based Photoaging Within Australian Pharmacies to Promote Smoking Cessation: Randomized Controlled Trial.** *J Med Internet Res* 2013, **15**(3):e64.
- 28  
29  
30 48. Jiwa M, Burford O, Parsons R: **Preliminary findings of how visual demonstrations of changes to physical appearance may enhance weight loss attempts.** *The European Journal of Public Health* 2015, **25**(2):283-285.
- 31  
32  
33 49. Brinker TJ, Owczarek AD, Seeger W, Groneberg DA, Brieske CM, Jansen P, Klode J, Stoffels I, Schadendorf D, Izar B: **A Medical Student-Delivered Smoking Prevention Program, Education Against Tobacco, for Secondary Schools in Germany: Randomized Controlled Trial.** *Journal of Medical Internet Research* 2017, **19**(6):e199.
- 34  
35  
36 50. Williams AL, Grogan S, Clark-Carter D, Buckley E: **Impact of a facial-ageing intervention versus a health literature intervention on women's sun protection attitudes and behavioural intentions.** *Psychology & health* 2013, **28**(9):993-1008.
- 37  
38  
39 51. Presti LL, Chang P, Taylor MF: **Young Australian adults' reactions to viewing personalised UV photoaged photographs.** *The Australasian medical journal* 2014, **7**(11):454.
- 40  
41  
42 52. D'Orazio J, Jarrett S, Amaro-Ortiz A, Scott T: **UV radiation and the skin.** *International journal of molecular sciences* 2013, **14**(6):12222-12248.
- 43  
44  
45 53. Kammeyer A, Luiten R: **Oxidation events and skin aging.** *Ageing research reviews* 2015, **21**:16-29.
- 46  
47  
48  
49  
50  
51  
52  
53  
54  
55  
56  
57  
58  
59  
60

- 1  
2  
3  
4  
5  
6  
7  
8  
9  
10  
11  
12  
13  
14  
15  
16  
17  
18  
19  
20  
21  
22  
23  
24  
25  
26  
27  
28  
29  
30  
31  
32  
33  
34  
35  
36  
37  
38  
39  
40  
41  
42  
43  
44  
45  
46  
47  
48  
49  
50  
51  
52  
53  
54  
55  
56  
57  
58  
59  
60
54. Ajzen I: **Theory of planned behavior.** *Handb Theor Soc Psychol Vol One* 2011, **1**:438.
  55. Bakos L, Masiero N, Bakos R, Burttet R, Wagner M, Benzano D: **European ancestry and cutaneous melanoma in Southern Brazil.** *Journal of the European Academy of Dermatology and Venereology* 2009, **23**(3):304-307.
  56. Detert H, Hedlund S, Anderson C, Rodvall Y, Festin K, Whiteman D, Falk M: **Validation of sun exposure and protection index (SEPI) for estimation of sun habits.** *Cancer epidemiology* 2015, **39**(6):986-993.
  57. Robine J, Jagger C: **Translation & Linguistic Evaluation protocol & Supporting Material.** *WHO/UNESCAP Project on Health and Disability Statistics* 2003.
  58. Brinker TJ, Holzapfel J, Baudson TG, Sies K, Jakob L, Baumert HM, Heckl M, Cirac A, Suhre JL, Mathes V: **Photoaging smartphone app promoting poster campaign to reduce smoking prevalence in secondary schools: the Smokerface Randomized Trial: design and baseline characteristics.** *BMJ open* 2016, **6**(11):e014288.
  59. Donald A, Donner A: **Adjustments to the Mantel-Haenszel chi - square statistic and odds ratio variance estimator when the data are clustered.** *Statistics in Medicine* 1987, **6**(4):491-499.
  60. Sterne JA, White IR, Carlin JB, Spratt M, Royston P, Kenward MG, Wood AM, Carpenter JR: **Multiple imputation for missing data in epidemiological and clinical research: potential and pitfalls.** *Bmj* 2009, **338**:b2393.
  61. Rat C, Houd S, Gaultier A, Grimault C, Quereux G, Mercier A, Letrilliart L, Dreno B, Nguyen JM: **General practitioner management related to skin cancer prevention and screening during standard medical encounters: a French cross-sectional study based on the International Classification of Primary Care.** *BMJ open* 2017, **7**(1):e013033.



1  
2  
3  
4  
5  
6  
7  
8  
9  
10  
11  
12  
13  
14  
15  
16  
17  
18  
19  
20  
21  
22  
23  
24  
25  
26  
27  
28  
29  
30  
31  
32  
33  
34  
35  
36  
37  
38  
39  
40  
41  
42  
43  
44  
45  
46  
47  
48  
49  
50  
51  
52  
53  
54  
55  
56  
57  
58  
59  
60

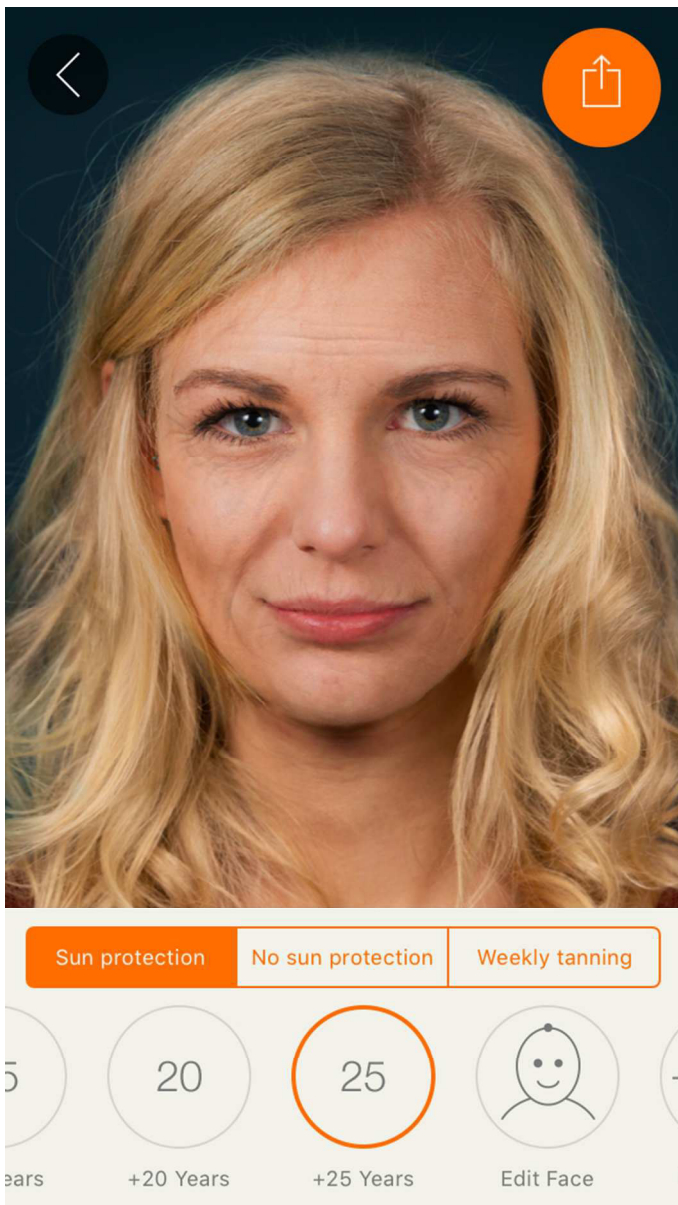

Figure 1: Effect view of the app with bottom bar indicating the effects shown on ones own face.

225x400mm (72 x 72 DPI)

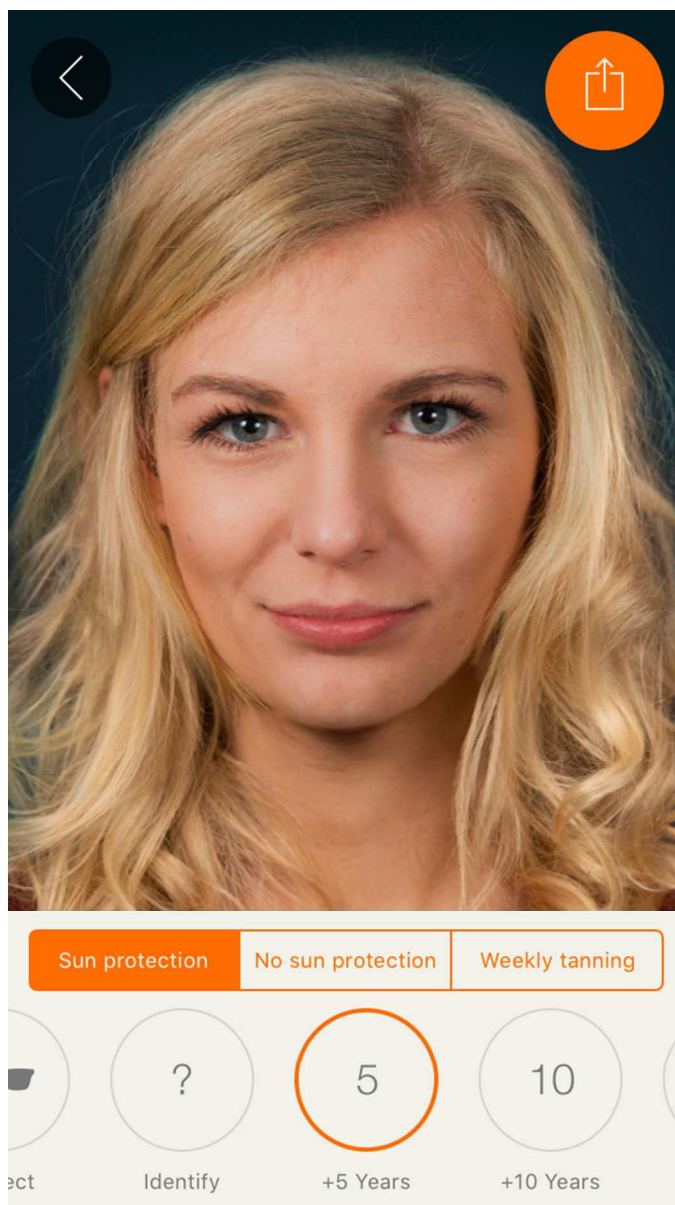

45 Figure 2: Effect view of the app with bottom bar indicating the effects shown on ones own face.

46 225x400mm (72 x 72 DPI)

1  
2  
3  
4  
5  
6  
7  
8  
9  
10  
11  
12  
13  
14  
15  
16  
17  
18  
19  
20  
21  
22  
23  
24  
25  
26  
27  
28  
29  
30  
31  
32  
33  
34  
35  
36  
37  
38  
39  
40  
41  
42  
43  
44  
45  
46  
47  
48  
49  
50  
51  
52  
53  
54  
55  
56  
57  
58  
59  
60

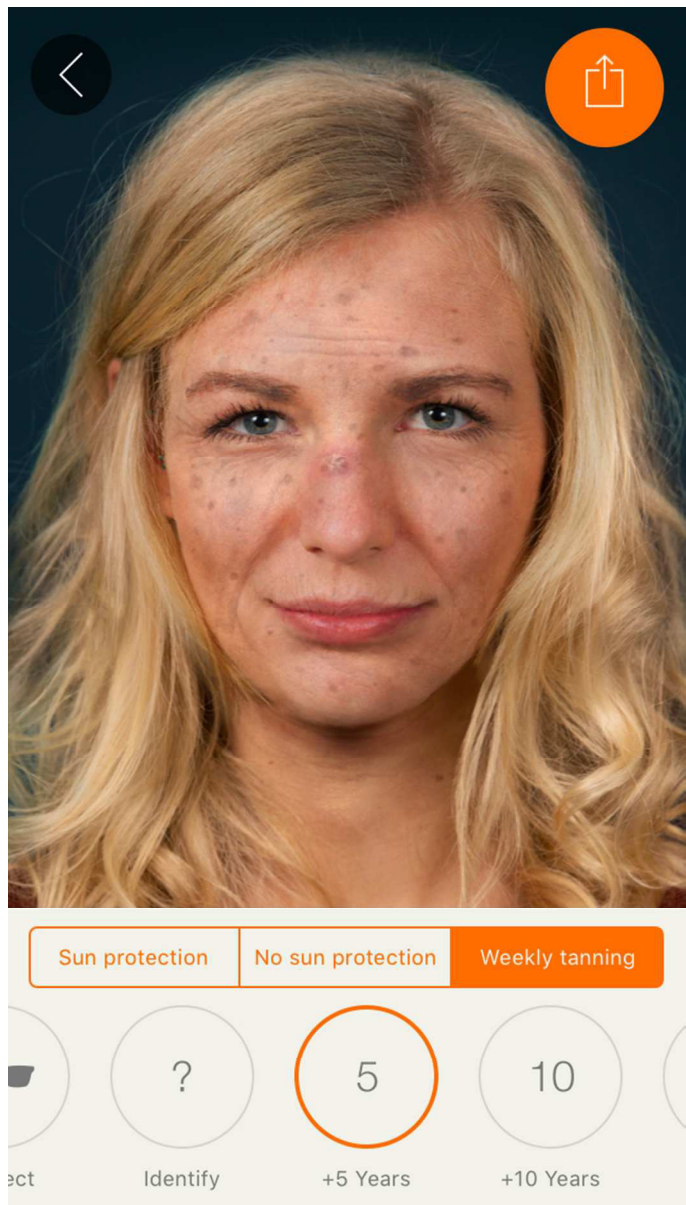

Figure 3: Effect view of the app with bottom bar indicating the effects shown on ones own face.

225x400mm (72 x 72 DPI)

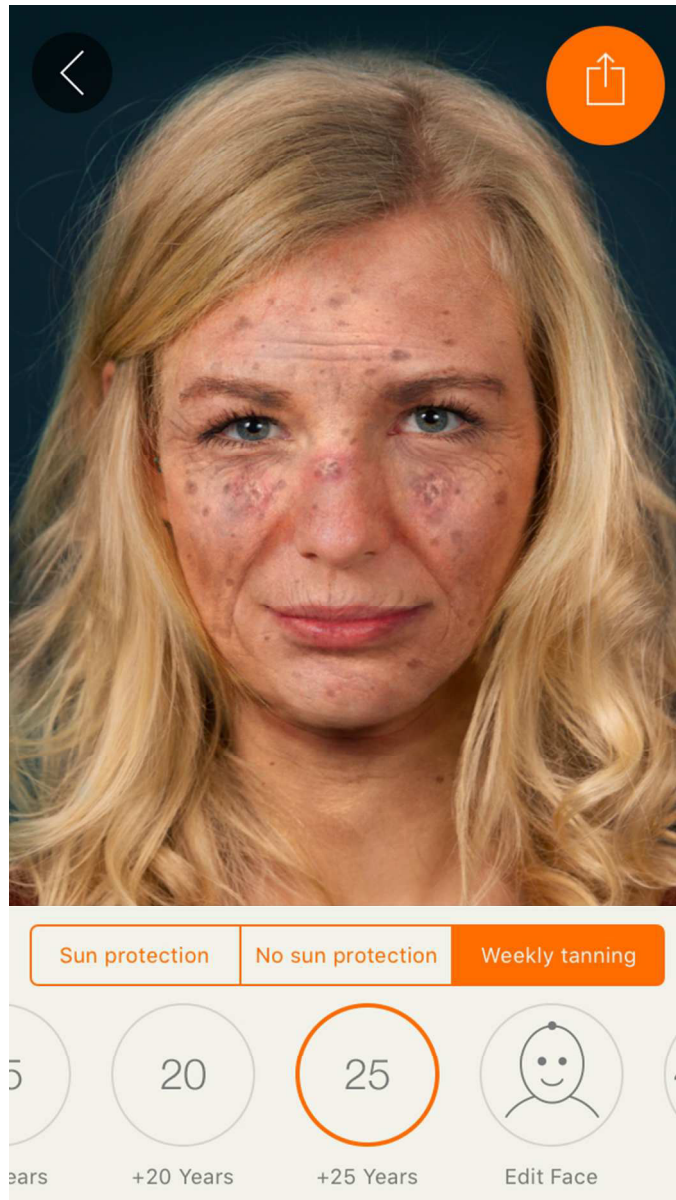

Figure 4: Effect view of the app with bottom bar indicating the effects shown on ones own face.

225x400mm (72 x 72 DPI)

1  
2  
3  
4  
5  
6  
7  
8  
9  
10  
11  
12  
13  
14  
15  
16  
17  
18  
19  
20  
21  
22  
23  
24  
25  
26  
27  
28  
29  
30  
31  
32  
33  
34  
35  
36  
37  
38  
39  
40  
41  
42  
43  
44  
45  
46  
47  
48  
49  
50  
51  
52  
53  
54  
55  
56  
57  
58  
59  
60

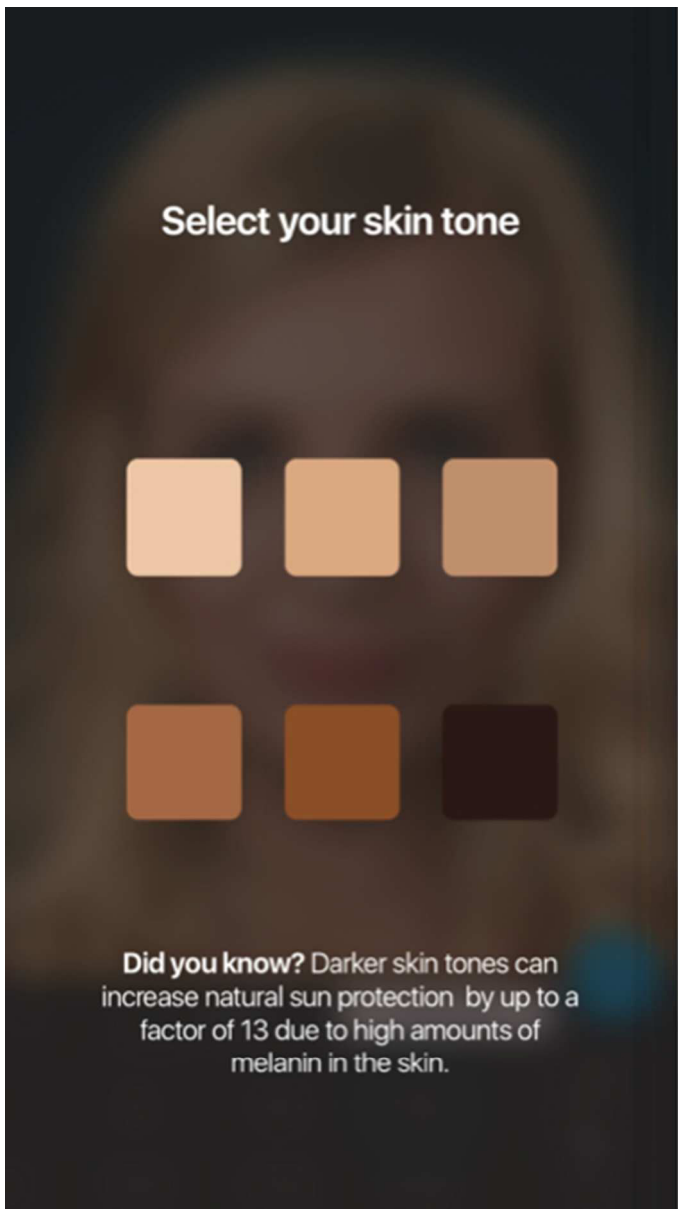

Figure 5: Fitzpatrick skin type picker at the start of the app.



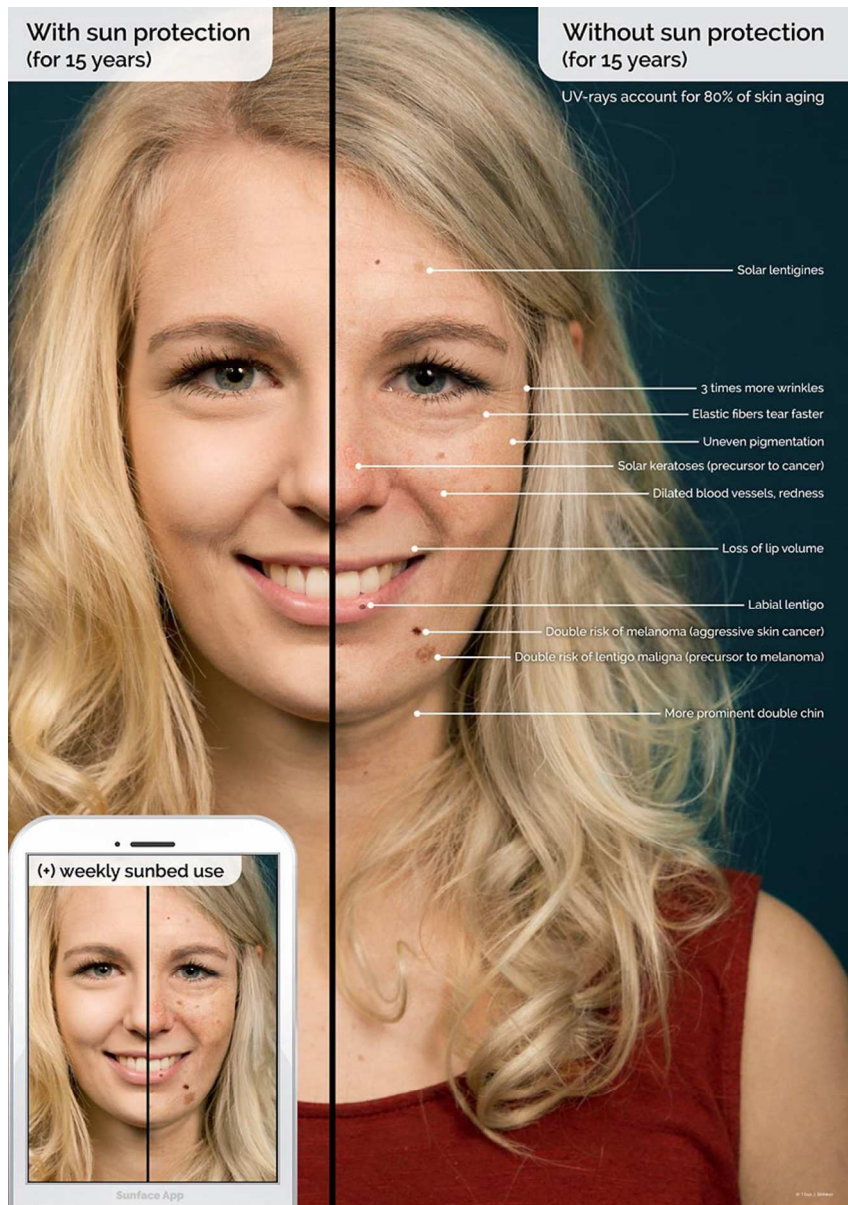

Figure 6: Explanation graphic of the effects seen provided as an infographic within the app.

299x423mm (72 x 72 DPI)

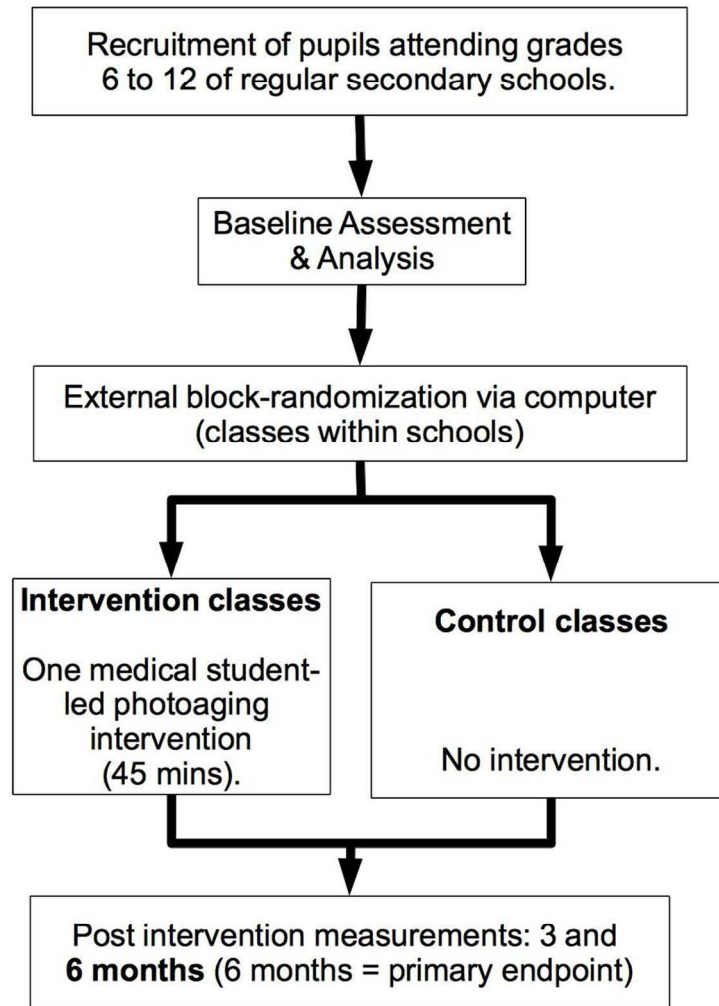

**Figure 6**  
**Study design.**

Figure 7: Study Design

370x523mm (72 x 72 DPI)

# BMJ Open

## A skin cancer prevention photoaging intervention for secondary schools in Brazil delivered by medical students: protocol for a randomized controlled trial

|                                 |                                                                                                                                                                                                                                                                                                                                                                                                                                                                                                                                                                                                                                                                                                                                                                                                                                                                                                                                                                                                                                                                                                                                                                                                                                                                                                                                                                                                                                                                                                                                                                                                                                                                                              |
|---------------------------------|----------------------------------------------------------------------------------------------------------------------------------------------------------------------------------------------------------------------------------------------------------------------------------------------------------------------------------------------------------------------------------------------------------------------------------------------------------------------------------------------------------------------------------------------------------------------------------------------------------------------------------------------------------------------------------------------------------------------------------------------------------------------------------------------------------------------------------------------------------------------------------------------------------------------------------------------------------------------------------------------------------------------------------------------------------------------------------------------------------------------------------------------------------------------------------------------------------------------------------------------------------------------------------------------------------------------------------------------------------------------------------------------------------------------------------------------------------------------------------------------------------------------------------------------------------------------------------------------------------------------------------------------------------------------------------------------|
| Journal:                        | <i>BMJ Open</i>                                                                                                                                                                                                                                                                                                                                                                                                                                                                                                                                                                                                                                                                                                                                                                                                                                                                                                                                                                                                                                                                                                                                                                                                                                                                                                                                                                                                                                                                                                                                                                                                                                                                              |
| Manuscript ID                   | bmjopen-2017-018299.R1                                                                                                                                                                                                                                                                                                                                                                                                                                                                                                                                                                                                                                                                                                                                                                                                                                                                                                                                                                                                                                                                                                                                                                                                                                                                                                                                                                                                                                                                                                                                                                                                                                                                       |
| Article Type:                   | Protocol                                                                                                                                                                                                                                                                                                                                                                                                                                                                                                                                                                                                                                                                                                                                                                                                                                                                                                                                                                                                                                                                                                                                                                                                                                                                                                                                                                                                                                                                                                                                                                                                                                                                                     |
| Date Submitted by the Author:   | 30-Oct-2017                                                                                                                                                                                                                                                                                                                                                                                                                                                                                                                                                                                                                                                                                                                                                                                                                                                                                                                                                                                                                                                                                                                                                                                                                                                                                                                                                                                                                                                                                                                                                                                                                                                                                  |
| Complete List of Authors:       | <p>Brinker, Titus; University Hospital Heidelberg, Department of Dermatology and National Center for Tumor Diseases (NCT); Universitat Duisburg-Essen, Department of Dermatology, Venerology and Allergology</p> <p>Faria, Bianca; University of Itauna, 35680-142 Itauna, Brazil, School of Medicine</p> <p>Gatzka, Martina; University of Ulm, Department of Dermatology and Allergic Diseases</p> <p>de Faria, Olber; Universidade de Itauna, School of Medicine</p> <p>Klode, Joachim; University Hospital Essen, University Duisburg-Essen, Essen, Germany, Department of Dermatology, Venerology and Allergology; Universitat Duisburg-Essen, West German Cancer Center</p> <p>Schadendorf, Dirk; University Hospital Essen, University Duisburg-Essen, Essen, Germany, Department of Dermatology, Venerology and Allergology; Universitat Duisburg-Essen, West German Cancer Center</p> <p>Stoffels, Ingo; Universitat Duisburg-Essen, Department of Dermatology, Venerology and Allergology; Universitat Duisburg-Essen, West German Cancer Center</p> <p>Jansen, Philipp; Universitat Duisburg-Essen, Department of Dermatology, Venerology and Allergology; Universitat Duisburg-Essen, West German Cancer Center</p> <p>Buslaff, Fabian; University Hospital Heidelberg, Department of Dermatology and National Center for Tumor Diseases (NCT)</p> <p>Lisboa, Oscar; Universidade Federal de Ouro Preto, School of Medicine</p> <p>Oliveira, Ana; Universidade de Itauna, School of Medicine</p> <p>Lino, Henrique; University of Itauna, 35680-142 Itauna, Brazil, School of Medicine</p> <p>Bernardes-Souza, Breno; Universidade Federal de Ouro Preto, School of Medicine</p> |
| <b>Primary Subject Heading</b>: | Dermatology                                                                                                                                                                                                                                                                                                                                                                                                                                                                                                                                                                                                                                                                                                                                                                                                                                                                                                                                                                                                                                                                                                                                                                                                                                                                                                                                                                                                                                                                                                                                                                                                                                                                                  |
| Secondary Subject Heading:      | Epidemiology, Dermatology, Public health                                                                                                                                                                                                                                                                                                                                                                                                                                                                                                                                                                                                                                                                                                                                                                                                                                                                                                                                                                                                                                                                                                                                                                                                                                                                                                                                                                                                                                                                                                                                                                                                                                                     |
| Keywords:                       | PUBLIC HEALTH, DERMATOLOGY, PREVENTIVE MEDICINE                                                                                                                                                                                                                                                                                                                                                                                                                                                                                                                                                                                                                                                                                                                                                                                                                                                                                                                                                                                                                                                                                                                                                                                                                                                                                                                                                                                                                                                                                                                                                                                                                                              |
|                                 |                                                                                                                                                                                                                                                                                                                                                                                                                                                                                                                                                                                                                                                                                                                                                                                                                                                                                                                                                                                                                                                                                                                                                                                                                                                                                                                                                                                                                                                                                                                                                                                                                                                                                              |



1  
2  
3  
4  
5  
6  
7  
8  
9  
10  
11  
12  
13  
14  
15  
16  
17  
18  
19  
20  
21  
22  
23  
24  
25  
26  
27  
28  
29  
30  
31  
32  
33  
34  
35  
36  
37  
38  
39  
40  
41  
42  
43  
44  
45  
46  
47  
48  
49  
50  
51  
52  
53  
54  
55  
56  
57  
58  
59  
60

SCHOLARONE™  
Manuscripts

For peer review only

1  
2  
3 **A skin cancer prevention photoaging intervention for secondary schools in**  
4 **Brazil delivered by medical students: protocol for a randomized controlled trial**  
5  
6  
7

8  
9 Titus J. Brinker<sup>1,2\*</sup>, Bianca Lisa Faria<sup>3</sup>, Martina Gatzka<sup>4</sup>, Olber Moreira de Faria<sup>3</sup>,  
10 Joachim Klode<sup>2</sup>, Dirk Schadendorf<sup>2</sup>, Ingo Stoffels<sup>2</sup>, Philipp Jansen<sup>2</sup>, Fabian Buslaff<sup>1</sup>,  
11 Oscar Campos Lisboa<sup>5</sup>, Ana Carla Cruz Oliveira<sup>3</sup>, Henrique Augusto Lino<sup>3</sup>, Breno  
12 Bernardes-Souza<sup>5</sup>  
13  
14  
15

- 16  
17  
18 1. Department of Dermatology and National Center for Tumor Diseases (NCT),  
19 University Hospital Heidelberg, University of Heidelberg, Heidelberg,  
20 Germany  
21  
22  
23 2. Department of Dermatology, Venerology and Allergology, University Hospital  
24 Essen, University of Duisburg-Essen, 45122 Essen, Germany  
25  
26  
27 3. School of Medicine, University of Itauna, 35680-142 Itauna, Brazil  
28  
29  
30 4. Department of Dermatology and Allergic Diseases, University of Ulm, Ulm,  
31 Germany.  
32  
33  
34 5. School of Medicine, Federal University of Ouro Preto, 35400-000 Ouro Preto,  
35 Brazil  
36  
37  
38  
39  
40  
41

42 \* Address for correspondence: Titus J. Brinker, Department of Dermatology and  
43 National Center for Tumor Diseases (NCT), University Hospital Heidelberg,  
44 University of Heidelberg, Heidelberg, Germany; E-mail: titus.brinker@gmail.com;  
45  
46  
47  
48 Telephone number: +4915175084347  
49  
50  
51

52  
53 **E-Mails:** titus.brinker@gmail.com (TJB), biancalisadefaria@outlook.com (BLF),  
54 martina.gatzka@uni-ulm.de (MG), olbermoreira@uol.com.br (OMF),  
55 Joachim.Klode@uk-essen.de (JK), Dirk.Schadendorf@uk-essen.de (DS),  
56  
57  
58  
59

1  
2  
3 Ingo.Stoffels@uk-essen.de (IS), Philipp.Jansen@uk-essen.de (PJ),  
4 [fabian.buslaff@fau.de](mailto:fabian.buslaff@fau.de) (FB), oscarlisboa17@gmail.com (OCL),  
5  
6  
7 anacarlaco@outlook.com (ACCO), henriquelino@live.co.uk (HAL),  
8  
9 brenoneps@gmail.com (BBS)  
10  
11  
12  
13  
14  
15

16 Manuscript version: 2 (major revision was made to the original protocol after  
17 reviewers' comments)  
18  
19  
20  
21  
22  
23  
24  
25  
26  
27  
28  
29  
30  
31  
32  
33  
34  
35  
36  
37  
38  
39  
40  
41  
42  
43  
44  
45  
46  
47  
48  
49  
50  
51  
52  
53  
54  
55  
56  
57  
58  
59  
60

## ABSTRACT

### Introduction

The incidence of melanoma is increasing faster than any other major cancer both in Brazil and worldwide. The southeast of Brazil has especially high incidences of melanoma, and early detection is low. Exposure to UV radiation represents a primary risk factor for developing melanoma. Increasing attractiveness is a major motivation for adolescents for tanning. A medical student-delivered intervention that harnesses the broad availability of mobile phones as well as adolescents' interest in their appearance may represent a novel method to improve skin cancer prevention.

### Methods and Analysis

We developed a free mobile app ("Sunface"), which will be implemented in at least 30 secondary school classes, each with 21 students (at least 30 classes with 21 students for control) in February 2018 in Southeast Brazil via a novel method called mirroring. In a 45-minute classroom seminar, the students' altered three-dimensional selfies on tablets are "mirrored" via a projector in front of their entire class, showing the effects of unprotected UV exposure on their future faces. External block randomization via computer is performed on the class level with a 1:1 allocation. Sociodemographic data, as well as skin type, ancestry, UV protection behavior and its predictors are measured via a paper-pencil questionnaire before as well as three and six months post-intervention. The primary endpoint is the group difference in the 30-day prevalence of daily sunscreen use at a six-month follow-up. Secondary endpoints include (1) the difference in daily sunscreen use at a three-month follow-up, (2) if a self-skin exam in accordance with the ABCDE rule was performed within the six-month follow-up and (3) the number of tanning sessions.

1  
2  
3 **Ethics and dissemination:** Ethical approval was obtained from the ethics committee  
4  
5 of the University of Itana. Results will be disseminated at conferences and in peer-  
6  
7 reviewed journals.  
8  
9

10 **Trial Registration:** #NCT03178240  
11  
12  
13  
14  
15  
16  
17  
18  
19  
20  
21  
22  
23  
24  
25  
26  
27  
28  
29  
30  
31  
32  
33  
34  
35  
36  
37  
38  
39  
40  
41  
42  
43  
44  
45  
46  
47  
48  
49  
50  
51

52 **Strengths and limitations of this study**  
53  
54  
55  
56  
57  
58  
59  
60

- This is the first study measuring the longitudinal effectiveness of a photoaging mobile app to change sun protection behavior.
- External randomization via computer and a relatively high number of clusters ensure good comparability between groups.
- Cluster effects cannot be excluded because the intervention and control classes are located in the same schools.

## Introduction

According to the World Health Organization, the incidence of melanoma is increasing more rapidly than any other major cancer both in Brazil and worldwide. Melanoma is one of the most common cancers in young adults and poses substantial health and economic burdens [1].

Approximately 90% of melanomas are associated with UV exposure, in particular with the frequency of severe sunburns, and are therefore highly preventable [2]. Multiple studies showed that daily sunscreen use with a sun protection factor (SPF) above 30, as recommended by international dermatology guidelines, may prevent sunburns and skin cancer including melanoma [3-6].

Brazil has one of the highest UV indexes on earth; additionally, tanning is culturally established and Brazilians commonly experience unprotected overexposure to the sun, especially in their childhood and teenage years [7-11]. In a 2008 population-based survey with 1,604 participants in the south of Brazil, 48.7% reported at least one sunburn in the prior year [10]. In an attempt to mitigate the health damage caused by excessive UV exposure, Brazil was the first country to prohibit indoor

1  
2  
3 tanning in 2009, albeit with limited success [9]. The southeast of Brazil (the location  
4 of this study) is especially populated by citizens with a European ancestry and  
5 therefore has high incidences of melanoma (up to 23.5/100,000 inhabitants) with a  
6 lack of early diagnosis and an overall survival below worldwide rates [12-15].  
7  
8  
9

10  
11  
12 Interventions encouraging sun protection habits are important, particularly among  
13 adolescents, as increased risk of skin cancer is associated with cumulative UV  
14 exposure and sunburns early in life [16-18]. In line with this association, various  
15 recent experimental studies to test these effects in young target groups aimed at  
16 promoting sunscreen use as an end point [19-22], and others used various UV  
17 protection behaviors (including avoiding sunbeds) or behavior scores [23-32]. Given  
18 the substantial amount of time that children and adolescents spend in the school  
19 environment, addressing skin cancer prevention in this setting is crucial and provides  
20 a unique opportunity to propel skin cancer prevention programs [33].  
21  
22  
23  
24  
25  
26  
27  
28  
29  
30  
31  
32  
33  
34  
35

36 Despite the effectiveness of daily sunscreen and its implementation in international  
37 dermatologic guidelines [34], a study conducted in Brazil among 398 medical  
38 students from the city of Curitiba showed that only 8.4% use sunscreen daily, 4.3%  
39 had already used tanning beds and 85.5% had past sunburns despite having  
40 undergone a clinical rotation in a Dermatology department [8]. The lack of exemplary  
41 behavior among prospective physicians regarding skin cancer prevention is known  
42 on a global scale [35-37]. The authors of this study have concluded that novel  
43 engagement methods are needed to answer the increasing demand for skin cancer  
44 awareness among physicians.  
45  
46  
47  
48  
49  
50  
51  
52  
53  
54  
55  
56  
57  
58  
59  
60

1  
2  
3 The Sunface mirroring intervention aims to provide science-based skin cancer  
4 prevention to a large number of adolescents in an attempt to sensitize prospective  
5 physicians to the importance of exemplary behavior [38, 39].  
6  
7  
8  
9

### 10 *Current knowledge on school-based skin cancer prevention*

11  
12  
13  
14 Unhealthy behavior in regards of UV exposure is mostly initiated in early  
15 adolescence [40], often with the idea that a tan increases attractiveness [41-43]; the  
16 problems related to melanoma and skin atrophy are too far in the future to fathom.  
17  
18  
19  
20

21  
22  
23  
24 A recent randomized trial with Australian high school students demonstrated that  
25 appearance-based videos on UV-induced premature aging were superior in  
26 encouraging sunscreen use to videos of the same length focusing exclusively on  
27 health aspects [19]. These findings are in line with international studies  
28 demonstrating the important influence of self-perceived attractiveness on self-esteem  
29 in adolescence [44, 45]. Furthermore, enhancing one's attractiveness is a primary  
30 motivation for tanning in adolescents both in Brazil and worldwide [41, 46, 47]. In  
31 addition, the success of appearance-based photoaging interventions, in which an  
32 image is altered to predict future appearance in the fields of tobacco and adiposity  
33 prevention, shows promise for these interventions in behavioral change settings [48-  
34 53].  
35  
36  
37  
38  
39  
40  
41  
42  
43  
44  
45  
46

47  
48 In the setting of skin cancer prevention, a quasi-experimental study by Williams et al.  
49 demonstrated significantly higher scores for predictors of sun protection behavior in  
50 young women from the UK (70 participants in total) using a photoaging desktop  
51 program [54]. Furthermore, the photoaging software 'showed promising reduction in  
52 young adults' tanning intentions in a study with ten participants in total (7 female and  
53  
54  
55  
56  
57  
58  
59  
60



1  
2  
3 3 male) [55]. However, prior studies are limited by their small sample size and  
4  
5 limitations related to expanding the target population.  
6  
7  
8  
9  
10

### 11 12 13 **Introduction of the Sunface app** 14

15  
16 We harnessed the widespread availability of mobile phones and adolescents'  
17 interest in appearance to develop the free mobile phone app "Sunface," which  
18 enables the user take a selfie and then offers three categories: "daily sun  
19 protection", "no sun protection" and "weekly tanning," showing the altered face at 5  
20 to 25 years in the future (Figure 1, Figure 2, Figure 3, Figure 4). All effects are based  
21 on the individual skin type that the user can choose at the start of the app (Figure 5).  
22 The app also shows the most common UV-induced skin cancers via extra buttons  
23 and calculates how the odds ratio is increased with different behaviors. In addition,  
24 the app gives advice on sun protection, explains the facial changes and encourages  
25 skin examinations using the ABCDE rule (assess border irregularity, color variety,  
26 diameter, and evolution [56]).  
27  
28  
29  
30  
31  
32  
33  
34  
35  
36  
37  
38  
39  
40

41 Afterwards, the app offers many sharing options (animated video or photo) with  
42 family and friends. By this means, the social network of the user may also be  
43 informed about the various photoaging effects of excessive UV exposure and  
44 potential health consequences, as well as potentially learning about the benefits of  
45 using the app [57].  
46  
47  
48  
49  
50  
51

52  
53 To produce realistic effects (Figure 6) and to show the user realistic odds ratios for  
54 the options they choose in the app for the three most strongly associated skin  
55  
56  
57  
58  
59  
60

1  
2  
3 pathologies, an extensive review of the current literature on UV-induced skin  
4 damage [58, 59] was conducted for each specific skin type. As no trials with 25  
5 years of follow-up were available, we had to extrapolate the current evidence on UV-  
6 induced skin damage for the specific skin types. The evidence consists of more than  
7 50 publications to create realistic effects from a clinician's standpoint (which may  
8 differ from what the average person perceives as realistic).  
9  
10  
11  
12  
13  
14  
15

16  
17 We recently implemented this app in 2 German secondary schools via a method  
18 called mirroring. We "mirrored" the students' altered 3-dimensional (3D) selfies on  
19 mobile phones or tablets via a projector in front of their entire grade. Using an  
20 anonymous questionnaire, we then measured sociodemographic data as well as risk  
21 factors for melanoma and the perceptions of the intervention on a 5-point Likert  
22 scale among 205 students of both sexes aged 13-19 years (median 15 years).  
23  
24  
25  
26  
27  
28  
29  
30

31 In our pilot study, we found more than 60% agreement in both items measuring  
32 motivation to reduce UV exposure and only 12.5% disagreement: 126 (63.0%)  
33 agreed or strongly agreed that their 3D selfie motivated them to avoid using a  
34 tanning bed, and 124 (61.7%) agreed or strongly agreed to increase use of sun  
35 protection; only 25 (12.5%) disagreed with both items. However, no effects on actual  
36 behavior could be measured due to the cross-sectional design of the study [60].  
37  
38  
39  
40  
41  
42  
43  
44  
45  
46

47 This randomized trial was designed to answer the following questions:  
48  
49

50 Is the implementation of the app in secondary schools in southeastern Brazil effective  
51 in encouraging daily sunscreen use among adolescents? Is it equally effective for  
52 both genders? Is it effective for the most sensitive skin types? How does the app  
53  
54  
55  
56  
57  
58  
59  
60

1  
2  
3 intervention change the attitudes towards sun protection in accordance with the  
4  
5 theory of planned behavior [61]?  
6  
7  
8

## 9 10 **Methods and Analysis**

### 11 12 **Study Design**

13  
14  
15  
16 The Sunface trial is designed as a randomized controlled superiority trial with two  
17  
18 parallel groups. Our primary end point is the difference between the two groups in  
19  
20 daily sunscreen use (past 30 days) from baseline to six months follow-up (Figure 7).  
21  
22 The planned study period is February 2018 to November 2018. The study groups will  
23  
24 consist of randomized classes receiving the intervention and control classes within  
25  
26 the same schools (no intervention). Randomization is externally and centrally  
27  
28 performed at the school level with a 1:1 allocation (control:intervention) via computer  
29  
30 [12]. A total of at least 60 secondary school classes in Itauna, Brazil will participate in  
31  
32 the teacher-supervised baseline survey in February 2018, which is conducted by  
33  
34 trained data collectors. One week after the baseline survey, the intervention classes  
35  
36 receive a 45-minute app-based intervention conducted by local medical student  
37  
38 volunteers. Follow-up surveys will be conducted 3 and 6 months post-intervention.  
39  
40  
41  
42

43 **Figure 7**

### 44 45 46 **Intervention**

47  
48  
49 The school-based intervention under evaluation consists of a 45-minute educational  
50  
51 module in the classroom setting using a photoaging app. The intervention is  
52  
53 presented by 2 medical students per classroom to approximately 21 students at a  
54  
55 time. The goal is to initiate and guide the student evaluation process of skin cancer  
56  
57 prevention with age-appropriate information that helps the students reframe positive  
58  
59  
60

1  
2  
3 opinions and views regarding sun protection habits in a gain-framed and interactive  
4  
5 manner.

6  
7 To integrate app-based photoaging interventions into a school-based setting, we  
8  
9 previously developed and tested the mirroring approach in a pilot study [49].

10  
11 Mirroring means that the students' altered three-dimensional selfies on smartphones  
12  
13 or tablets are "mirrored" via a projector in front of the entire class. The mirroring  
14  
15 approach is implemented by medical student volunteers from the University of Itauna,  
16  
17 who receive standardized training in advance. To ensure the participation of all  
18  
19 students within a certain class and to avoid contamination within schools, we will  
20  
21 implement the mirroring intervention via 10 Samsung Galaxy Tablets that are already  
22  
23 set up and brought to the schools by the volunteers.  
24  
25  
26  
27

28  
29 In the first 10-minute phase, the displayed face of one student volunteer is used to  
30  
31 show the app's altered features in the three categories to the peer group, providing  
32  
33 an incentive for the rest of the class to test the app. Students can interact with their  
34  
35 own animated face via touch (sneezing, coughing, etc.; see Multimedia Appendix 1).  
36  
37 In front of their peers, they will be able to display their image as a non-/sun protection  
38  
39 user/weekly tanning bed user at 5, 10, 15, 20 and 25 years in the future (see Figure 1  
40  
41 and Figure 2). Multiple device displays can be projected simultaneously, which are  
42  
43 used to consolidate the altered measures with graphics (e.g., to explain wrinkle  
44  
45 formation). We implement mirroring with Galaxy Tab A (Samsung) via Apple's  
46  
47 proprietary AirPlay interface using the Android app "Mirroring360" (Splashtop Inc.).  
48  
49  
50  
51

52 <Multimedia Appendix 1 uploaded as an additional file>  
53  
54  
55  
56  
57  
58  
59  
60

1  
2  
3 In the second 15-minute phase, students are encouraged to try the app on one of the  
4 tablet computers. The number of provided tablet computers was calculated so that  
5 the phase would take up to 12 minutes at the most after factoring in a utilization time  
6 of approximately 4 minutes per student. By this calculation, 25 minutes of the  
7 mirroring intervention and 10 provided tablets were sufficient to have every student  
8 within a class of 40 pupils successfully photoaged at least once.

9  
10  
11 In the following 15 minutes, the remaining functions of the app are discussed with the  
12 students: facial changes, the ABCDE rule and the guidelines for sun protection are  
13 addressed in an interactive setting. At the end of the classroom seminar, we ask for  
14 the students' final judgments on daily sunscreen use to create positive peer pressure  
15 and influence the students' subjective norm in accordance with the theory of planned  
16 behavior [61].

17  
18  
19 In the last 5 minutes, the perception of the intervention by the students is measured  
20 directly after the intervention in an anonymous survey on a 5-point Likert scale via  
21 four items: (1) "The animation of my 3D selfie motivates me to use daily sunscreen,"  
22 (2) "I learned new benefits of sun protection," (3) "The intervention motivates me to  
23 check my skin with the ABCDE rule in the next six months," and (4) "The intervention  
24 was fun."  
25  
26  
27  
28  
29  
30  
31  
32  
33  
34  
35  
36  
37  
38  
39  
40  
41  
42  
43  
44  
45  
46  
47  
48  
49  
50  
51  
52  
53  
54  
55  
56  
57  
58  
59  
60

## Participants

### ***Eligibility criteria at baseline***

Students from Itauna in southeast Brazil attending grades 6 to 12 in all types of regular secondary school are eligible.

### ***Contaminated classes***

All classes will be included in the final intention-to-treat analysis. However, app use will be assessed in both groups at six months follow-up to assess contamination of control classes and will be the basis for a secondary (sensitivity) analysis with the methods described in the Analysis section of this protocol.

## Procedure

The schools are recruited via E-mail, telephone and personal appointment (in most cases with the principal). Reasons for non-participation are not recorded. Data are collected via a paper-pencil questionnaire. In addition to sociodemographic data (age, gender and school type), the questionnaire captures the Fitzpatrick skin type, the ancestry of the school students [62] and the frequency of sunscreen use in the past 30 days as well as other sun protection behaviors. These items are based on the sun exposure and protection index questionnaire [63] and were either used in their original form or adapted to the specific circumstances of the present study. No Portuguese equivalents of the instruments were available; thus, we used the Conceptual Method for translation described by the WHO/UNESCAP Project on Health and Disability Statistics [64]. Newly translated and/or modified items were extensively pretested and subjected to statistical analyses (internal consistency/Cronbach's  $\alpha$  and exploratory and confirmatory factor analyses, which represented the basis for item selection).

## Data Collection

Each data collector received training for data collection and was required to use an adapted standardized protocol for data collection, an optimized version of that used in the Smokerface randomized trial [65].

## Cluster randomization

In accordance with the guidelines for good epidemiologic practice, classes within schools are externally and centrally randomly assigned to the control or intervention group via block randomization in a 1:1 ratio (control:intervention) via computer by a statistician at the University of Duisburg-Essen, Germany. Stratification will be performed by grade.

## Outcomes

The primary endpoint is the difference in the 30-day-prevalence of daily sunscreen use between both groups at six months follow-up. Secondary endpoints include the difference in daily sunscreen use at three months follow-up if a self-skin exam in accordance with the ABCDE rule [56] was performed within the six-month follow-up and the number of tanning sessions in the past 30 days. For all end points, the number needed to treat will also be calculated. A daily sunscreen user is defined as a pupil who claims to have used sunscreen daily in the 30 days preceding the survey.

## Statistical considerations

### *Sample size calculation*

1  
2  
3 We calculated sample sizes of 630 in the intervention group and 630 in the control  
4 group, which were obtained by sampling 30 classes with 21 students each in the  
5 intervention group and 30 classes with 21 students each in the control group to  
6 achieve 80% power to detect a prevalence difference between the groups of 5%. The  
7 daily sunscreen prevalence was assumed to be 6% under the null hypothesis and  
8 11% under the alternative hypothesis based on a small pilot survey with 150 students  
9 in Itauna. The test statistic used is the two-sided score test (Farrington & Manning).  
10  
11 The significance level of the test is 0.05. Normal class size in Brazil is 35 pupils; a  
12 lost to follow-up effect of 40% was taken into account.  
13  
14  
15  
16  
17  
18  
19  
20  
21  
22  
23

#### 24 *Data entry*

25  
26 Data entry will be supported by the current software version of Formic Fusion by  
27 Xerox AG (Kloten, Switzerland) and the recommended scanners.  
28  
29  
30  
31

#### 32 *Analysis*

33  
34 To examine baseline differences in pupils' characteristics in our experimental design,  
35 we will use  $\chi^2$  tests for categorical variables and t-tests for continuous variables. To  
36 test for between-group differences in baseline and follow-up daily sunscreen use in  
37 the past 30 days, we will use a cluster-adjusted Mantel-Haenszel  $\chi^2$  test [66] with a  
38 significance level of 5% (two-sided). For the main analysis, HLM (hierarchical linear  
39 models) will be applied. HLM can handle the nested structure of the data and will be  
40 used to test for between-group differences in within-group changes in sun protection  
41 behavior over time. HLM will also be used to investigate the influence of further  
42 covariates (such as gender, European ancestry and skin type) and time-dependent  
43 behavior in secondary analyses. Statistical analyses will be performed using SPSS  
44 Statistics (IBM Corporation, New York, USA).  
45  
46  
47  
48  
49  
50  
51  
52  
53  
54  
55  
56  
57  
58  
59  
60



1  
2  
3 The effect that missing data may have on results will be assessed via sensitivity  
4 analysis. Dropouts (essentially participants who withdraw consent for continued  
5 follow-up or who are missing from the classroom during the survey) will be included  
6 in the analysis, and multiple imputation will be used to estimate the treatment effect  
7 [67].  
8  
9  
10  
11  
12  
13  
14  
15

## 16 Discussion

17  
18  
19 This is the first cluster-randomized school-based trial on photoaging skin cancer  
20 prevention and the first trial on medical student-delivered school-based skin cancer  
21 prevention worldwide. While classic health educational school-based approaches in  
22 skin cancer prevention were evaluated as inferior to appearance-based approaches  
23 [19], there is a global lack of novel, innovative strategies that harness current  
24 technology while taking widely accepted theories for behavioral change into account  
25 [61]. Although multiple studies have shown that skin cancer risk is predominantly  
26 associated with sun exposure early in life, there is a lack of awareness regarding risk  
27 groups.  
28  
29  
30  
31  
32  
33  
34  
35  
36  
37  
38  
39

40 Thus, this trial provides the opportunity to evaluate an innovative, highly scalable,  
41 appearance-based intervention in a high-risk population. It will also provide data to  
42 estimate whether photoaging mobile apps have the potential to be broadly  
43 implemented in schools via the mirroring intervention but also via other avenues (i.e.,  
44 posters [65] or smartphone-based advertising campaigns in the App Store and  
45 Google Play Store) or could be a valuable addition to existing educational programs.  
46  
47  
48  
49  
50  
51  
52  
53 Additionally, because it is delivered by medical students, this trial also sensitizes  
54 future physicians to the importance of skin cancer prevention, highlighting their  
55 associated responsibilities within communities [35, 68].  
56  
57  
58  
59  
60

1  
2  
3 According to the theory of planned behavior (TPB), the subjective norm and the  
4 expected self-efficacy of the participants play a substantial role in their resulting  
5 behavior: What do their peers think about tanning? Is the result of tanning regarded  
6 as attractive and does it therefore increase one's chances of finding a boy/girlfriend?  
7 How likely is it that a behavioral change can positively influence this reaction? The  
8 mirroring intervention triggers strong reactions of the peer group of the individual  
9 participant towards their photoaged future self (=affecting subjective norm) but also  
10 illustrates the power of one's own behavioral change (and thereby increases one's  
11 expectation of self-efficacy, another predictor of the TPB) to influence this reaction by  
12 peers [49].  
13  
14  
15  
16  
17  
18  
19  
20  
21  
22  
23  
24

### 25 *Limitations*

26  
27  
28 Because this study is conducted only in Brazil, the results may not be generalizable  
29 to other cultural or national settings. However, the theoretical basis for this  
30 intervention (the theory of planned behavior) has been proven to apply to most  
31 cultural contexts around the globe [61]. As this trial enrolls approximately 10 different  
32 public schools, it should be representative for most school types.  
33  
34  
35  
36  
37  
38  
39

40 We must choose classes and not schools as a cluster due to sample size limitations;  
41 thus, cluster effects cannot be entirely excluded. However, multiple steps are taken  
42 to limit contamination between the control and intervention classes (i.e., the name of  
43 the app is not mentioned to the pupils by the trained medical students, and the  
44 teachers of the control classes are strictly prohibited to talk about the intervention  
45 with their students). Cluster effects are also monitored in the endline questionnaire  
46 and provide a basis for a sensitivity analysis.  
47  
48  
49  
50  
51  
52  
53  
54

55  
56  
57 Some students may find the effects of the Surface App unrealistic, as indicated in  
58  
59  
60

1  
2  
3 our recently published pilot study. However, this does not appear to attenuate  
4  
5 motivation to adhere to UV protection behavior [60].  
6  
7

8 In summary, we evaluate the long-term effects on behavior of a novel method that  
9  
10 integrates photoaging in a school-based skin cancer prevention program in a  
11  
12 population with a high risk for developing skin cancer. The program affects the  
13  
14 students' peer group and also considers predictors for tanning. Our study is the first  
15  
16 randomized controlled trial on skin cancer prevention in Brazil and the first  
17  
18 randomized trial based on a medical student-delivered app and school skin cancer  
19  
20 prevention strategy.  
21  
22  
23  
24

### 25 **Ethics and Dissemination**

26  
27 Written informed consent will be obtained from both the participants themselves and  
28  
29 their parents. All participant information will be stored in locked file cabinets in areas  
30  
31 with limited access. The participants' study information will not be released outside  
32  
33 the study without the written permission of the participant. Results will be  
34  
35 disseminated at conferences, in peer-reviewed journals and on our websites.  
36  
37  
38  
39  
40  
41  
42

### 43 **Acknowledgements**

44  
45  
46 The authors would like to thank all participating schools, students, volunteering  
47  
48 medical students and teachers who helped organize the classroom visits in the city of  
49  
50 Itauna.  
51  
52  
53  
54  
55  
56  
57  
58  
59  
60

## Authors' Contributions

TJB initiated the study, invented, designed and organized the intervention, wrote the manuscript, drafted the design of the study and will perform the statistical analyses. BBS participated in the conception of the study. JK, PJ, IS, MG, FB and DS contributed to the design of the study and data analyses and proofread the manuscript. BBS and OCL contributed to the design and logistics of the study, assisted with the translation of classroom materials and reviewed the final version of the manuscript. BLF, OMF, HAL and ACCO will conduct data entry and coordinate/conduct the intervention in Brazil. They also supported the translation of the classroom materials and proofread the manuscript. All authors declare responsibility for the data and findings presented and have full access to the final trial dataset.

## Conflicts of Interest

None declared.

## Funding

The tablets are funded by the Young Research Award Research Grant from La Fondation La Roche Posay awarded to Titus J. Brinker for his research on the Sunface app. The University of Itauna will contribute by providing logistic support for the project and copies of all questionnaires. La Fondation La Roche Posay (LA FONDATION LA ROCHE-POSAY, Att : Cécile Voletm 62 quai Charles Pasqua, 92300 LEVALLOIS PERRET, France) and the University of Itauna Funding Board had no role in the design and conduction of this study or in the preparation, review or approval of this manuscript,

1. Livingstone E, Windemuth-Kieselbach C, Eigentler TK, Rompel R, Trefzer U, Nashan D, Rotterdam S, Ugurel S, Schadendorf D: **A first prospective population-based analysis investigating the actual practice of melanoma diagnosis, treatment and follow-up.** *European Journal of Cancer* 2011, **47**(13):1977-1989.
2. The Lancet Editorial Board: **Skin cancer: prevention is better than cure.** *The Lancet* 2014, **384**(9942):470.
3. Green AC, Williams GM, Logan V, Strutton GM: **Reduced melanoma after regular sunscreen use: randomized trial follow-up.** *Journal of Clinical Oncology* 2010, **29**(3):257-263.
4. Ghiasvand R, Weiderpass E, Green AC, Lund E, Veierød MB: **Sunscreen use and subsequent melanoma risk: A population-based cohort study.** *Journal of Clinical Oncology* 2016, **34**(33):3976-3983.
5. Nijsten T: **Sunscreen Use in the Prevention of Melanoma: Common Sense Rules.** In: American Society of Clinical Oncology; 2016.
6. Ou-Yang H, Jiang LI, Meyer K, Wang SQ, Farberg AS, Rigel DS: **Sun Protection by Beach Umbrella vs Sunscreen With a High Sun Protection Factor: A Randomized Clinical Trial.** *JAMA dermatology* 2017, **153**(3):304-308.
7. Benvenuto - Andrade C, Zen B, Fonseca G, Villa D, Cestari T: **Sun Exposure and Sun Protection Habits Among High - school Adolescents in Porto Alegre, Brazil.** *Photochemistry and photobiology* 2005, **81**(3):630-635.
8. Purim KSM, Wroblewski FC: **Sun exposure and protection among medical students in Curitiba (PR).** *Revista Brasileira de Educação Médica* 2014, **38**(4):477-485.
9. Schalka S, Steiner D, Ravelli FN, Steiner T, Terena AC, Marçon CR, Ayres EL, Addor FASa, Miot HA, Ponzio H: **Brazilian consensus on photoprotection.** *Anais brasileiros de dermatologia* 2014, **89**(6):1-74.
10. Haack RL, Horta BL, Cesar JA: **Sunburn in young people: population-based study in Southern Brazil.** *Revista de Saúde Pública* 2008, **42**(1):26-33.
11. Silva AA: **Outdoor Exposure to Solar Ultraviolet Radiation and Legislation in Brazil.** *Health physics* 2016, **110**(6):623-626.
12. Lima ASd, Stein CE, Casemiro KP, Rovere RK: **Epidemiology of Melanoma in the South of Brazil: study of a city in the Vale do Itajaí from 1999 to 2013.** *Anais brasileiros de dermatologia* 2015, **90**(2):185-189.
13. de Lima Vazquez V, Silva TB, de Andrade Vieira M, de Oliveira ATT, Lisboa MV, de Andrade DAP, Fregnani JHTG, Carneseca EC: **Melanoma characteristics in Brazil: demographics, treatment, and survival analysis.** *BMC research notes* 2015, **8**(1):4.
14. Amancio CT, Nascimento LFC: **Cutaneous melanoma in the State of São Paulo: a spatial approach.** *Anais brasileiros de dermatologia* 2014, **89**(3):442-446.
15. Naser N: **Cutaneous melanoma: a 30-year-long epidemiological study conducted in a city in southern Brazil, from 1980-2009.** *Anais brasileiros de dermatologia* 2011, **86**(5):932-941.
16. Lo JA, Fisher DE: **The melanoma revolution: from UV carcinogenesis to a new era in therapeutics.** *Science* 2014, **346**(6212):945-949.
17. Wu S, Han J, Laden F, Qureshi AA: **Long-term ultraviolet flux, other potential risk factors, and skin cancer risk: a cohort study.** *Cancer Epidemiology and Prevention Biomarkers* 2014, **23**(6):1080-1089.
18. Barton MK: **Indoor tanning increases melanoma risk, even in the absence of a sunburn.** *CA: a cancer journal for clinicians* 2014, **64**(6):367-368.

19. Tuong W, Armstrong AW: **Effect of appearance-based education compared with health-based education on sunscreen use and knowledge: a randomized controlled trial.** *Journal of the American Academy of Dermatology* 2014, **70**(4):665-669.
20. Craciun C, Schüz N, Lippke S, Schwarzer R: **Facilitating sunscreen use in women by a theory-based online intervention: A randomized controlled trial.** *Journal of health psychology* 2012, **17**(2):207-216.
21. Hirst NG, Gordon LG, Scuffham PA, Green AC: **Lifetime cost-effectiveness of skin cancer prevention through promotion of daily sunscreen use.** *Value in Health* 2012, **15**(2):261-268.
22. Sakoufaki M, Stergiopoulou A, Stratigos A: **Design and implementation of a health promotion program to prevent the harmful effects of ultraviolet radiation at primary school students of rural areas of Greece.** *International Journal of Research in Dermatology* 2017.
23. Miller K, Langholz B, Ly T, Harris S, Richardson J, Peng D, Cockburn M: **SunSmart: evaluation of a pilot school-based sun protection intervention in Hispanic early adolescents.** *Health education research* 2015:cyv011.
24. Aarestrup C, Bonnesen CT, Thygesen LC, Krarup AF, Waagstein AB, Jensen PD, Bentzen J: **The effect of a school-based intervention on sunbed use in Danish pupils at continuation schools: a cluster-randomized controlled trial.** *Journal of Adolescent Health* 2014, **54**(2):214-220.
25. Holman DM, Fox KA, Glenn JD, Guy GP, Watson M, Baker K, Cokkinides V, Gottlieb M, Lazovich D, Perna FM: **Strategies to reduce indoor tanning: current research gaps and future opportunities for prevention.** *American journal of preventive medicine* 2013, **44**(6):672-681.
26. Hillhouse J, Turrisi R, Scaglione NM, Cleveland MJ, Baker K, Florence LC: **A Web-Based Intervention to Reduce Indoor Tanning Motivations in Adolescents: a Randomized Controlled Trial.** *Prevention Science* 2016:1-10.
27. Stapleton JL, Hillhouse J, Levonyan-Radloff K, Manne SL: **Review of Interventions to Reduce Ultraviolet Tanning: Need for Treatments Targeting Excessive Tanning, An Emerging Addictive Behavior.** 2017.
28. Olson AL, Gaffney C, Starr P, Gibson JJ, Cole BF, Dietrich AJ: **SunSafe in the middle school years: a community-wide intervention to change early-adolescent sun protection.** *Pediatrics* 2007, **119**(1):e247-e256.
29. Miller KA, Huh J, Unger JB, Richardson JL, Allen MW, Peng DH, Cockburn MG: **Patterns of sun protective behaviors among Hispanic children in a skin cancer prevention intervention.** *Preventive medicine* 2015, **81**:303-308.
30. Turner D, Harrison SL, Buettner P, Nowak M: **Does being a "SunSmart School" influence hat-wearing compliance? An ecological study of hat-wearing rates at Australian primary schools in a region of high sun exposure.** *Preventive medicine* 2014, **60**:107-114.
31. Buller DB, Andersen PA, Walkosz BJ, Scott MD, Beck L, Cutter GR: **Rationale, design, samples, and baseline sun protection in a randomized trial on a skin cancer prevention intervention in resort environments.** *Contemporary clinical trials* 2016, **46**:67-76.
32. Sontag JM, Noar SM: **Assessing the Potential Effectiveness of Pictorial Messages to Deter Young Women from Indoor Tanning: An Experimental Study.** *Journal of Health Communication* 2017, **22**(4):294-303.
33. Guy GP, Holman DM, Watson M: **The Important Role of Schools in the Prevention of Skin Cancer.** *Jama dermatology* 2016, **152**(10):1083-1084.



- 1
  - 2
  - 3
  - 4
  - 5
  - 6
  - 7
  - 8
  - 9
  - 10
  - 11
  - 12
  - 13
  - 14
  - 15
  - 16
  - 17
  - 18
  - 19
  - 20
  - 21
  - 22
  - 23
  - 24
  - 25
  - 26
  - 27
  - 28
  - 29
  - 30
  - 31
  - 32
  - 33
  - 34
  - 35
  - 36
  - 37
  - 38
  - 39
  - 40
  - 41
  - 42
  - 43
  - 44
  - 45
  - 46
  - 47
  - 48
  - 49
  - 50
  - 51
  - 52
  - 53
  - 54
  - 55
  - 56
  - 57
  - 58
  - 59
  - 60
34. Farberg AS, Glazer AM, Rigel AC, White R, Rigel DS: **Dermatologists' Perceptions, Recommendations, and Use of Sunscreen.** *Jama dermatology* 2017, **153**(1):99-101.
35. Isvy A, Beauchet A, Saiag P, Mahé E: **Medical students and sun prevention: knowledge and behaviours in France.** *Journal of the European Academy of Dermatology and Venereology* 2013, **27**(2):e247-e251.
36. Nanyes JE, McGrath JM, Krejci-Manwaring J: **Medical Students' Perceptions of Skin Cancer: Confusion and Disregard for Warnings and the Need for New Preventive Strategies.** *Archives of dermatology* 2012, **148**(3):392-393.
37. Patel SS, Nijhawan RI, Stechschulte S, Parmet Y, Rouhani P, Kirsner RS, Hu S: **Skin cancer awareness, attitude, and sun protection behavior among medical students at the University of Miami Miller School of Medicine.** *Archives of dermatology* 2010, **146**(7):797-800.
38. Brinker TJ, Stamm-Balderjahn S, Seeger W, Klingelhöfer D, Groneberg DA: **Education Against Tobacco (EAT): a quasi-experimental prospective evaluation of a multinational medical-student-delivered smoking prevention programme for secondary schools in Germany.** *BMJ open* 2015, **5**(9):e008093.
39. Brinker TJ, Stamm-Balderjahn S, Seeger W, Groneberg DA: **Education Against Tobacco (EAT): a quasi-experimental prospective evaluation of a programme for preventing smoking in secondary schools delivered by medical students: a study protocol.** *BMJ Open* 2014, **4**(7):e004909.
40. Görig T, Diehl K, Greinert R, Breitbart EW, Schneider S: **Prevalence of sun-protective behaviour and intentional sun tanning in German adolescents and adults: results of a nationwide telephone survey.** *Journal of the European Academy of Dermatology and Venereology* 2017, **Volume 31**(Issue 6):Pages 913–1077, e1273–e1306.
41. Schneider S, Diehl K, Bock C, Schlüter M, Breitbart EW, Volkmer B, Greinert R: **Sunbed use, user characteristics, and motivations for tanning: results from the German population-based SUN-Study 2012.** *JAMA dermatology* 2013, **149**(1):43-49.
42. Hillhouse J, Turrisi R, Scaglione NM, Cleveland MJ, Baker K, Florence LC: **A Web-Based Intervention to Reduce Indoor Tanning Motivations in Adolescents: a Randomized Controlled Trial.** *Prevention Science* 2017, **18**(2):131-140.
43. Hillhouse J, Turrisi R, Cleveland MJ, Scaglione NM, Baker K, Florence LC: **Theory-driven longitudinal study exploring indoor tanning initiation in teens using a person-centered approach.** *Annals of Behavioral Medicine* 2016, **50**(1):48-57.
44. Baudson TG, Weber KE, Freund PA: **More Than Only Skin Deep: Appearance Self-Concept Predicts Most of Secondary School Students' Self-Esteem.** *Frontiers in psychology* 2016, **7**.
45. Wichstrøm L, von Soest T: **Reciprocal relations between body satisfaction and self-esteem: A large 13-year prospective study of adolescents.** *Journal of adolescence* 2016, **47**:16-27.
46. Bränström R, Kasparian NA, Chang Y-m, Affleck P, Tibben A, Aspinwall LG, Azizi E, Baron-Epel O, Battistuzzi L, Bergman W: **Predictors of sun protection behaviors and severe sunburn in an international online study.** *Cancer Epidemiology and Prevention Biomarkers* 2010, **19**(9):2199-2210.
47. Görig T, Diehl K, Greinert R, Breitbart E, Schneider S: **Prevalence of sun - protective behavior and intentional sun tanning in German adolescents and**

- 1  
2  
3 **adults: results of a nationwide telephone survey.** *Journal of the European*  
4 *Academy of Dermatology and Venereology* 2017.
- 5 48. Brinker TJ, Seeger W: **Photoaging Mobile Apps: A Novel Opportunity for**  
6 **Smoking Cessation?** *Journal of medical Internet research* 2015, **17(7):**e186.
- 7 49. Brinker TJ, Seeger W, Buslaff F: **Photoaging Mobile Apps in School-Based**  
8 **Tobacco Prevention: The Mirroring Approach.** *J Med Internet Res* 2016,  
9 **18(6):**e183.
- 10 50. Burford O, Jiwa M, Carter O, Parsons R, Hendrie D: **Internet-Based Photoaging**  
11 **Within Australian Pharmacies to Promote Smoking Cessation: Randomized**  
12 **Controlled Trial.** *J Med Internet Res* 2013, **15(3):**e64.
- 13 51. Jiwa M, Burford O, Parsons R: **Preliminary findings of how visual**  
14 **demonstrations of changes to physical appearance may enhance weight**  
15 **loss attempts.** *The European Journal of Public Health* 2015, **25(2):**283-285.
- 16 52. Brinker TJ, Owczarek AD, Seeger W, Groneberg DA, Brieske CM, Jansen P, Klode J,  
17 Stoffels I, Schadendorf D, Izar B: **A Medical Student-Delivered Smoking**  
18 **Prevention Program, Education Against Tobacco, for Secondary Schools in**  
19 **Germany: Randomized Controlled Trial.** *Journal of Medical Internet Research*  
20 2017, **19(6):**e199.
- 21 53. Brinker TJ, Brieske CM, et al.: **A Dermatologists' Ammunition in the War**  
22 **Against Smoking.** *J Med Internet Res* 2017, **forthcoming.**
- 23 54. Williams AL, Grogan S, Clark-Carter D, Buckley E: **Impact of a facial-ageing**  
24 **intervention versus a health literature intervention on women's sun**  
25 **protection attitudes and behavioural intentions.** *Psychology & health* 2013,  
26 **28(9):**993-1008.
- 27 55. Presti LL, Chang P, Taylor MF: **Young Australian adults' reactions to viewing**  
28 **personalised UV photoaged photographs.** *The Australasian medical journal*  
29 2014, **7(11):**454.
- 30 56. Robinson JK, Wayne JD, Martini MC, Hultgren BA, Mallett KA, Turrisi R: **Early**  
31 **detection of new melanomas by patients with melanoma and their partners**  
32 **using a structured skin self-examination skills training intervention: a**  
33 **randomized clinical trial.** *JAMA dermatology* 2016, **152(9):**979-985.
- 34 57. Brinker TJ, Schadendorf D, Klode J, Cosgarea I, Rösch A, Jansen P, Stoffels I, Izar B: **Photoaging Mobile Apps as a Novel Opportunity for Melanoma Prevention: Pilot Study.** *JMIR mHealth and uHealth* 2017, **5(7):**e101.
- 35 58. D'Orazio J, Jarrett S, Amaro-Ortiz A, Scott T: **UV radiation and the skin.** *International journal of molecular sciences* 2013, **14(6):**12222-12248.
- 36 59. Kammeyer A, Luiten R: **Oxidation events and skin aging.** *Ageing research reviews* 2015, **21:**16-29.
- 37 60. Brinker TJ, Brieske CM, Schaefer CM, Buslaff F, Gatzka M, Petri MP, Sondermann  
38 W, Schadendorf D, Stoffels I, Klode J: **Photoaging Mobile Apps in School-Based**  
39 **Melanoma Prevention: Pilot Study.** *Journal of Medical Internet Research* 2017,  
40 **19(9):**e319.
- 41 61. Ajzen I: **Theory of planned behavior.** *Handb Theor Soc Psychol Vol One* 2011,  
42 **1:**438.
- 43 62. Bakos L, Masiero N, Bakos R, Burttet R, Wagner M, Benzano D: **European**  
44 **ancestry and cutaneous melanoma in Southern Brazil.** *Journal of the*  
45 *European Academy of Dermatology and Venereology* 2009, **23(3):**304-307.
- 46 63. Detert H, Hedlund S, Anderson C, Rodvall Y, Festin K, Whiteman D, Falk M: **Validation of sun exposure and protection index (SEPI) for estimation of sun habits.** *Cancer epidemiology* 2015, **39(6):**986-993.



- 1  
2  
3 64. Robine J, Jagger C: **Translation & Linguistic Evaluation protocol & Supporting**  
4 **Material.** *WHO/UNESCAP Project on Health and Disability Statistics* 2003.
- 5 65. Brinker TJ, Holzapfel J, Baudson TG, Sies K, Jakob L, Baumert HM, Heckl M, Cirac A,  
6 Suhre JL, Mathes V: **Photoaging smartphone app promoting poster campaign**  
7 **to reduce smoking prevalence in secondary schools: the Smokerface**  
8 **Randomized Trial: design and baseline characteristics.** *BMJ open* 2016,  
9 6(11):e014288.
- 10 66. Donald A, Donner A: **Adjustments to the Mantel-Haenszel chi - square**  
11 **statistic and odds ratio variance estimator when the data are clustered.**  
12 *Statistics in Medicine* 1987, 6(4):491-499.
- 13 67. Sterne JA, White IR, Carlin JB, Spratt M, Royston P, Kenward MG, Wood AM,  
14 Carpenter JR: **Multiple imputation for missing data in epidemiological and**  
15 **clinical research: potential and pitfalls.** *Bmj* 2009, 338:b2393.
- 16 68. Rat C, Houd S, Gaultier A, Grimault C, Quereux G, Mercier A, Letrilliart L, Dreno B,  
17 Nguyen JM: **General practitioner management related to skin cancer**  
18 **prevention and screening during standard medical encounters: a French**  
19 **cross-sectional study based on the International Classification of Primary**  
20 **Care.** *BMJ open* 2017, 7(1):e013033.  
21  
22  
23  
24

### 25 *Figure Legends*

- 26  
27 Figure 1: Effect view: 25 years of skin aging with sun protection.  
28 Figure 2: Effect view: 5 years of skin aging with sun protection.  
29 Figure 3: Effect view: 5 years of weekly tanning without sun protection.  
30 Figure 4: Start screen of the app prompts the user to pick his skin type.  
31 Figure 5: Maximum effect view: 25 years of UV-damage due to weekly tanning.  
32 Figure 6: Explanatory graphic of the effects within the app.  
33 Figure 7: Study Design.  
34  
35  
36  
37  
38  
39  
40  
41  
42  
43  
44  
45  
46  
47  
48  
49  
50  
51  
52  
53  
54  
55  
56  
57  
58  
59  
60

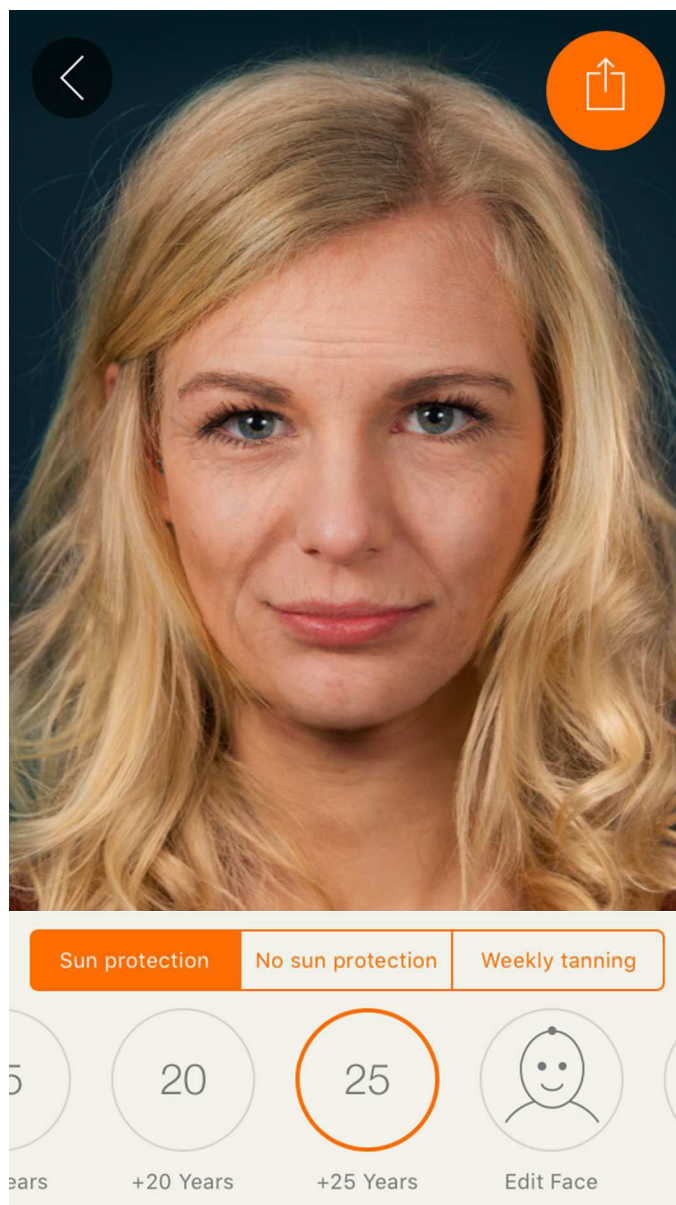

Figure 1: Effect view: 25 years of skin aging with sun protection.

54x96mm (300 x 300 DPI)

1  
2  
3  
4  
5  
6  
7  
8  
9  
10  
11  
12  
13  
14  
15  
16  
17  
18  
19  
20  
21  
22  
23  
24  
25  
26  
27  
28  
29  
30  
31  
32  
33  
34  
35  
36  
37  
38  
39  
40  
41  
42  
43  
44  
45  
46  
47  
48  
49  
50  
51  
52  
53  
54  
55  
56  
57  
58  
59  
60

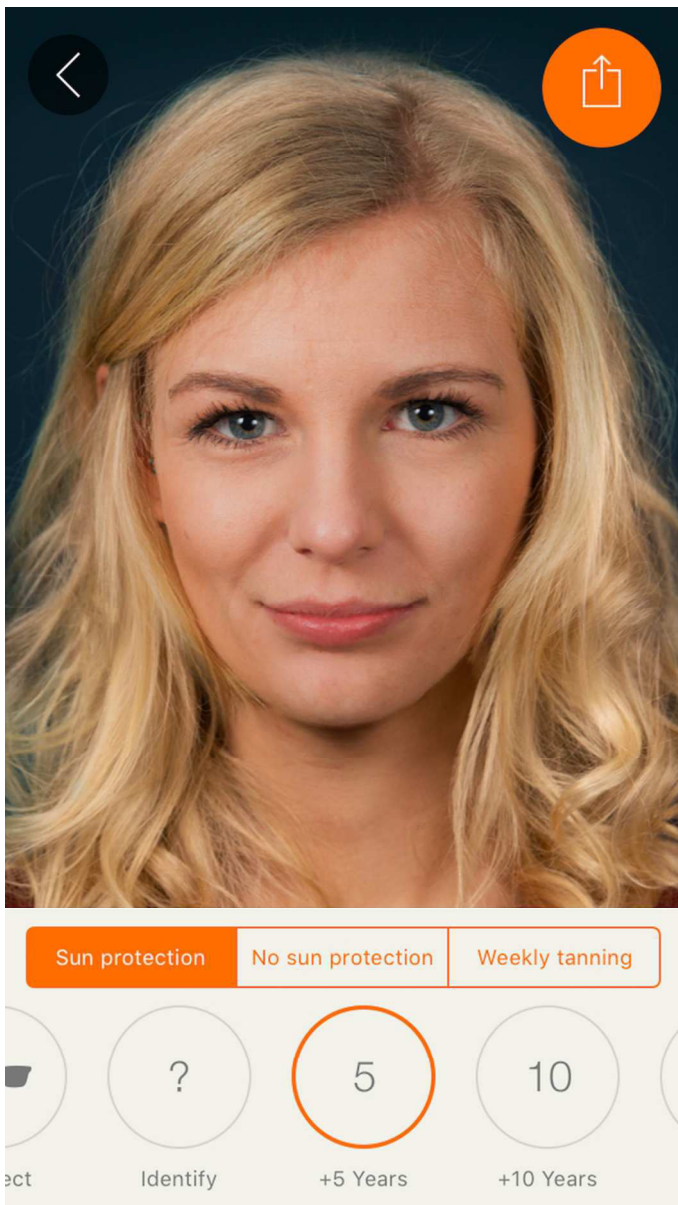

Figure 2: Effect view: 5 years of skin aging with sun protection.

67x120mm (300 x 300 DPI)

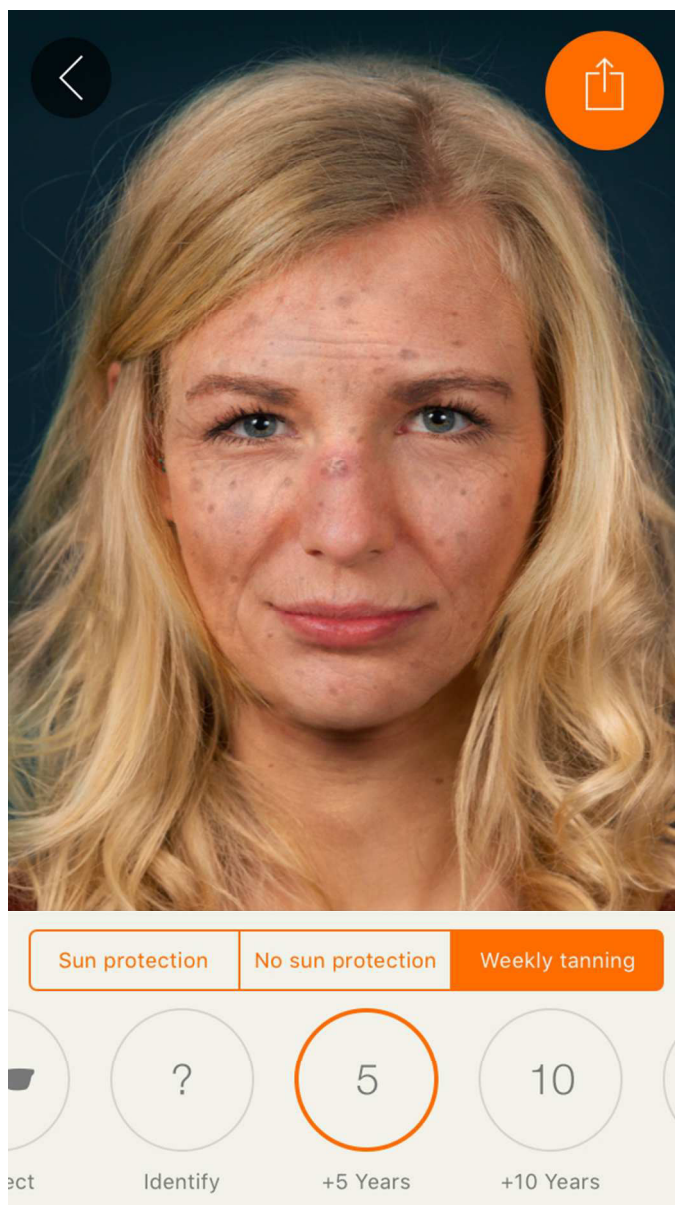

Figure 3: Effect view: 5 years of weekly tanning without sun protection.

54x96mm (300 x 300 DPI)

1  
2  
3  
4  
5  
6  
7  
8  
9  
10  
11  
12  
13  
14  
15  
16  
17  
18  
19  
20  
21  
22  
23  
24  
25  
26  
27  
28  
29  
30  
31  
32  
33  
34  
35  
36  
37  
38  
39  
40  
41  
42  
43  
44  
45  
46  
47  
48  
49  
50  
51  
52  
53  
54  
55  
56  
57  
58  
59  
60

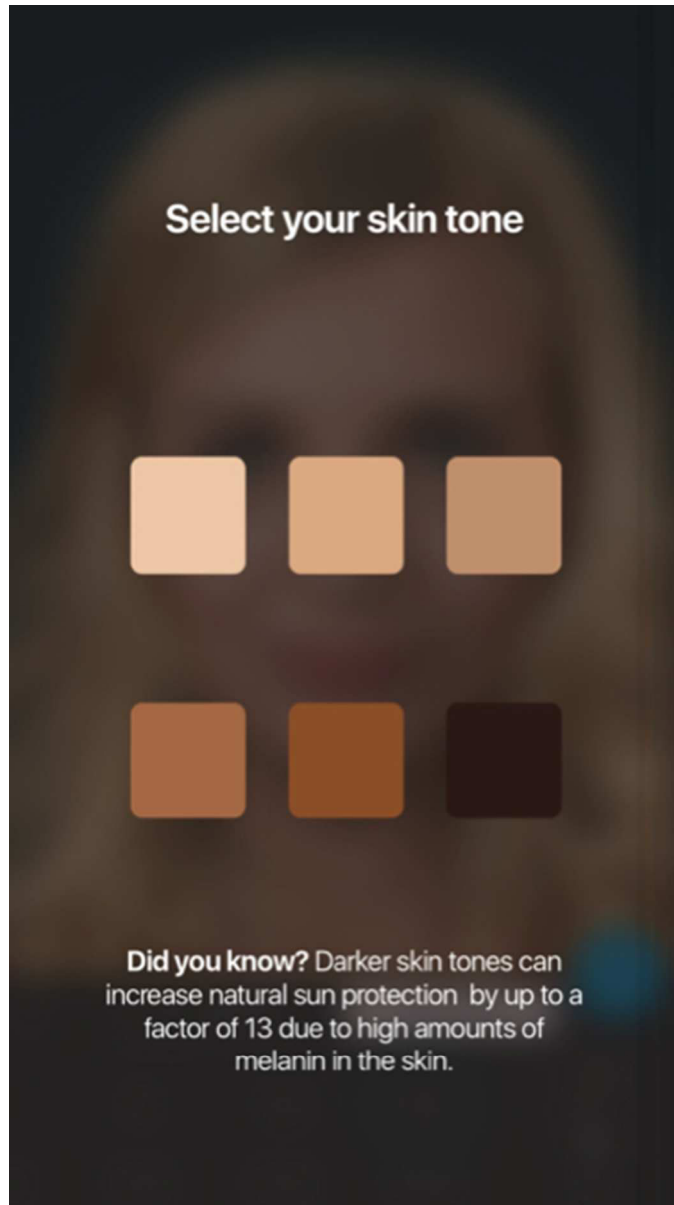

Figure 4: Start screen of the app prompts the user to pick his skin type.

30x54mm (300 x 300 DPI)



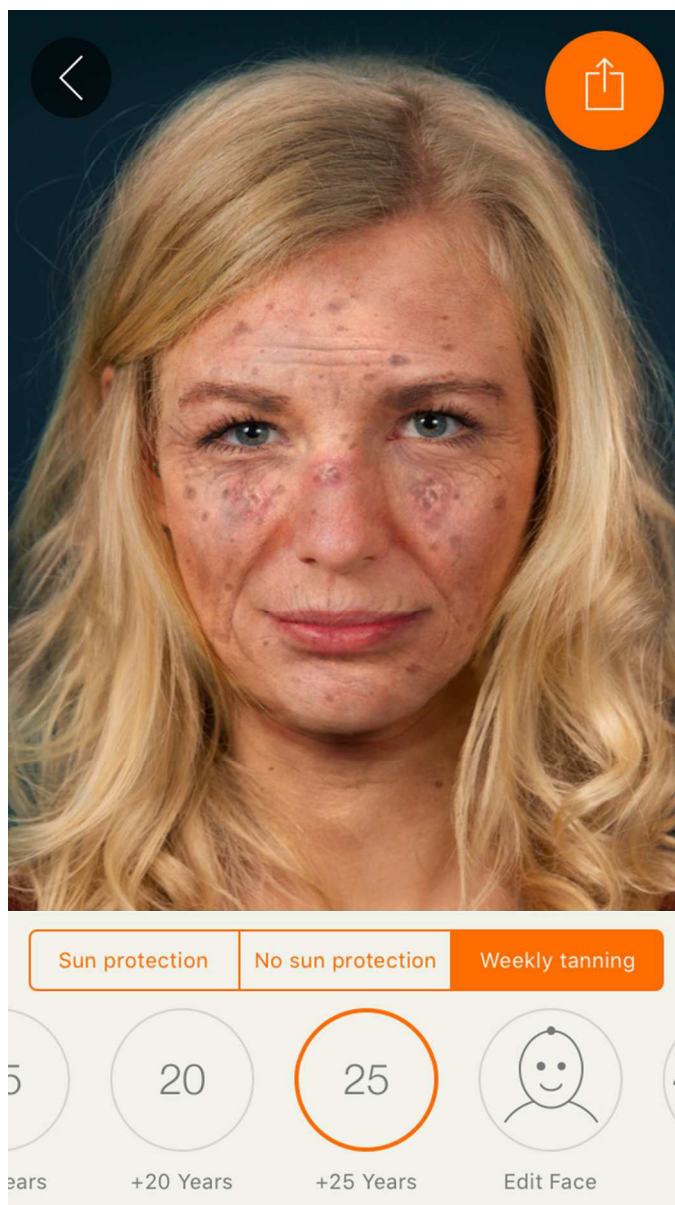

Maximum effect view: 25 years of UV-damage due to weekly tanning.

54x96mm (300 x 300 DPI)

1  
2  
3  
4  
5  
6  
7  
8  
9  
10  
11  
12  
13  
14  
15  
16  
17  
18  
19  
20  
21  
22  
23  
24  
25  
26  
27  
28  
29  
30  
31  
32  
33  
34  
35  
36  
37  
38  
39  
40  
41  
42  
43  
44  
45  
46  
47  
48  
49  
50  
51  
52  
53  
54  
55  
56  
57  
58  
59  
60

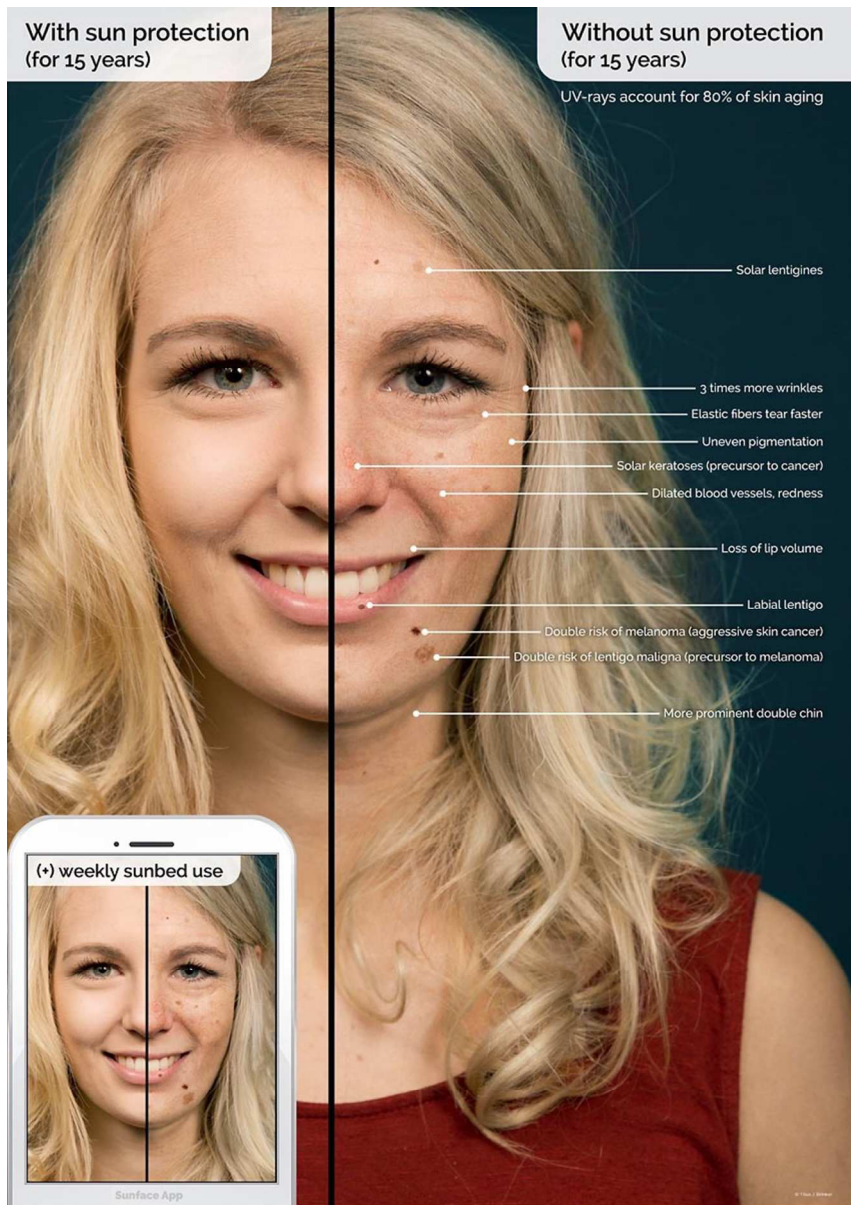

Figure 6: Explanatory graphic of the effects within the app.

71x101mm (300 x 300 DPI)

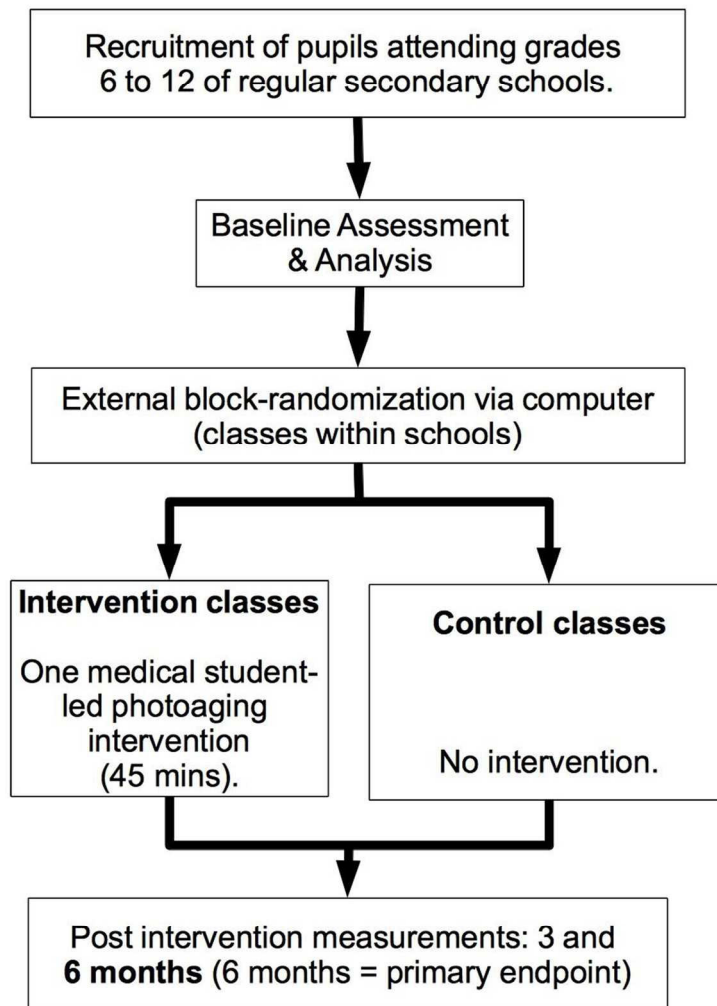

**Figure 6**  
**Study design.**

Figure 7: Study Design.

88x125mm (300 x 300 DPI)



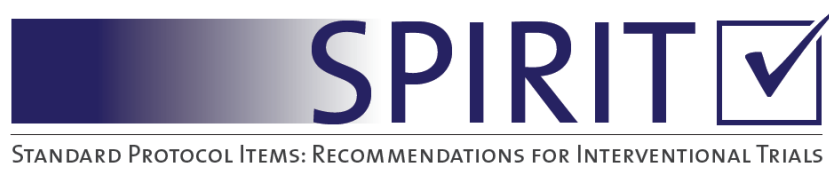

SPIRIT 2013 Checklist: Recommended items to address in a clinical trial protocol and related documents\*

| Section/item                      | Item No | Description                                                                                                                                                                                                                                                                                           |
|-----------------------------------|---------|-------------------------------------------------------------------------------------------------------------------------------------------------------------------------------------------------------------------------------------------------------------------------------------------------------|
| <b>Administrative information</b> |         |                                                                                                                                                                                                                                                                                                       |
| Title                             | 1       | Descriptive title identifying the study design, population, interventions, and, if applicable, trial acronym <b>p. 1</b>                                                                                                                                                                              |
| Trial registration                | 2a      | Trial identifier and registry name. If not yet registered, name of intended registry <b>p. 4</b>                                                                                                                                                                                                      |
|                                   | 2b      | All items from the World Health Organization Trial Registration Data Set <b>p. 4</b>                                                                                                                                                                                                                  |
| Protocol version                  | 3       | Date and version identifier <b>p. 2</b>                                                                                                                                                                                                                                                               |
| Funding                           | 4       | Sources and types of financial, material, and other support <b>p. 19</b>                                                                                                                                                                                                                              |
| Roles and responsibilities        | 5a      | Names, affiliations, and roles of protocol contributors <b>p. 1-2 and 19</b>                                                                                                                                                                                                                          |
|                                   | 5b      | Name and contact information for the trial sponsor <b>p. 19</b>                                                                                                                                                                                                                                       |
|                                   | 5c      | Role of study sponsor and funders, if any, in study design; collection, management, analysis, and interpretation of data; writing of the report; and the decision to submit the report for publication, including whether they will have ultimate authority over any of these activities <b>p. 19</b> |
|                                   | 5d      | Composition, roles, and responsibilities of the coordinating centre, steering committee, endpoint adjudication committee, data management team, and other individuals or groups overseeing the trial, if applicable (see Item 21a for data monitoring committee) <b>n/a</b>                           |
| <b>Introduction</b>               |         |                                                                                                                                                                                                                                                                                                       |
| Background and rationale          | 6a      | Description of research question and justification for undertaking the trial, including summary of relevant studies (published and unpublished) examining benefits and harms for each intervention <b>p. 5-10</b>                                                                                     |
|                                   | 6b      | Explanation for choice of comparators <b>p. 10</b>                                                                                                                                                                                                                                                    |
| Objectives                        | 7       | Specific objectives or hypotheses <b>p. 10</b>                                                                                                                                                                                                                                                        |
| Trial design                      | 8       | Description of trial design including type of trial (eg, parallel group, crossover, factorial, single group), allocation ratio, and framework (eg, superiority, equivalence, noninferiority, exploratory) <b>p. 10</b>                                                                                |

**Methods: Participants, interventions, and outcomes**

|                      |     |                                                                                                                                                                                                                                                                                                                                                                                             |
|----------------------|-----|---------------------------------------------------------------------------------------------------------------------------------------------------------------------------------------------------------------------------------------------------------------------------------------------------------------------------------------------------------------------------------------------|
| Study setting        | 9   | Description of study settings (eg, community clinic, academic hospital) and list of countries where data will be collected. Reference to where list of study sites can be obtained <b>p. 10 and 13</b>                                                                                                                                                                                      |
| Eligibility criteria | 10  | Inclusion and exclusion criteria for participants. If applicable, eligibility criteria for study centres and individuals who will perform the interventions (eg, surgeons, psychotherapists) <b>p. 13</b>                                                                                                                                                                                   |
| Interventions        | 11a | Interventions for each group with sufficient detail to allow replication, including how and when they will be administered <b>p. 10-12</b>                                                                                                                                                                                                                                                  |
|                      | 11b | Criteria for discontinuing or modifying allocated interventions for a given trial participant (eg, drug dose change in response to harms, participant request, or improving/worsening disease) <b>p. 16</b>                                                                                                                                                                                 |
|                      | 11c | Strategies to improve adherence to intervention protocols, and any procedures for monitoring adherence (eg, drug tablet return, laboratory tests) <b>p. 10</b>                                                                                                                                                                                                                              |
|                      | 11d | Relevant concomitant care and interventions that are permitted or prohibited during the trial <b>n/a</b>                                                                                                                                                                                                                                                                                    |
| Outcomes             | 12  | Primary, secondary, and other outcomes, including the specific measurement variable (eg, systolic blood pressure), analysis metric (eg, change from baseline, final value, time to event), method of aggregation (eg, median, proportion), and time point for each outcome. Explanation of the clinical relevance of chosen efficacy and harm outcomes is strongly recommended <b>p. 14</b> |
| Participant timeline | 13  | Time schedule of enrolment, interventions (including any run-ins and washouts), assessments, and visits for participants. A schematic diagram is highly recommended (see Figure) <b>p. 10</b>                                                                                                                                                                                               |
| Sample size          | 14  | Estimated number of participants needed to achieve study objectives and how it was determined, including clinical and statistical assumptions supporting any sample size calculations <b>p. 14-15</b>                                                                                                                                                                                       |
| Recruitment          | 15  | Strategies for achieving adequate participant enrolment to reach target sample size <b>p. 14-15</b>                                                                                                                                                                                                                                                                                         |

**Methods: Assignment of interventions (for controlled trials)**

## Allocation:

|                     |     |                                                                                                                                                                                                                                                                                                                                                                          |
|---------------------|-----|--------------------------------------------------------------------------------------------------------------------------------------------------------------------------------------------------------------------------------------------------------------------------------------------------------------------------------------------------------------------------|
| Sequence generation | 16a | Method of generating the allocation sequence (eg, computer-generated random numbers), and list of any factors for stratification. To reduce predictability of a random sequence, details of any planned restriction (eg, blocking) should be provided in a separate document that is unavailable to those who enrol participants or assign interventions <b>p. 14-16</b> |
|---------------------|-----|--------------------------------------------------------------------------------------------------------------------------------------------------------------------------------------------------------------------------------------------------------------------------------------------------------------------------------------------------------------------------|

|    |                                                           |     |                                                                            |
|----|-----------------------------------------------------------|-----|----------------------------------------------------------------------------|
| 1  |                                                           |     |                                                                            |
| 2  | Allocation                                                | 16b | Mechanism of implementing the allocation sequence (eg, central             |
| 3  | concealment                                               |     | telephone; sequentially numbered, opaque, sealed envelopes),               |
| 4  | mechanism                                                 |     | describing any steps to conceal the sequence until interventions are       |
| 5  |                                                           |     | assigned <b>p. 14</b>                                                      |
| 6  |                                                           |     |                                                                            |
| 7  | Implementation                                            | 16c | Who will generate the allocation sequence, who will enrol participants,    |
| 8  |                                                           |     | and who will assign participants to interventions <b>p. 14</b>             |
| 9  |                                                           |     |                                                                            |
| 10 | Blinding                                                  | 17a | Who will be blinded after assignment to interventions (eg, trial           |
| 11 | (masking)                                                 |     | participants, care providers, outcome assessors, data analysts), and       |
| 12 |                                                           |     | how <b>p. 14</b>                                                           |
| 13 |                                                           | 17b | If blinded, circumstances under which unblinding is permissible, and       |
| 14 |                                                           |     | procedure for revealing a participant's allocated intervention during      |
| 15 |                                                           |     | the trial <b>n/a</b>                                                       |
| 16 |                                                           |     |                                                                            |
| 17 |                                                           |     |                                                                            |
| 18 |                                                           |     |                                                                            |
| 19 |                                                           |     |                                                                            |
| 20 | <b>Methods: Data collection, management, and analysis</b> |     |                                                                            |
| 21 | Data collection                                           | 18a | Plans for assessment and collection of outcome, baseline, and other        |
| 22 | methods                                                   |     | trial data, including any related processes to promote data quality (eg,   |
| 23 |                                                           |     | duplicate measurements, training of assessors) and a description of        |
| 24 |                                                           |     | study instruments (eg, questionnaires, laboratory tests) along with        |
| 25 |                                                           |     | their reliability and validity, if known. Reference to where data          |
| 26 |                                                           |     | collection forms can be found, if not in the protocol <b>p. 13-16</b>      |
| 27 |                                                           | 18b | Plans to promote participant retention and complete follow-up,             |
| 28 |                                                           |     | including list of any outcome data to be collected for participants who    |
| 29 |                                                           |     | discontinue or deviate from intervention protocols <b>p. 16</b>            |
| 30 |                                                           |     |                                                                            |
| 31 | Data                                                      | 19  | Plans for data entry, coding, security, and storage, including any         |
| 32 | management                                                |     | related processes to promote data quality (eg, double data entry;          |
| 33 |                                                           |     | range checks for data values). Reference to where details of data          |
| 34 |                                                           |     | management procedures can be found, if not in the protocol <b>p. 13-16</b> |
| 35 |                                                           |     |                                                                            |
| 36 |                                                           |     |                                                                            |
| 37 |                                                           |     |                                                                            |
| 38 |                                                           |     |                                                                            |
| 39 |                                                           |     |                                                                            |
| 40 | Statistical                                               | 20a | Statistical methods for analysing primary and secondary outcomes.          |
| 41 | methods                                                   |     | Reference to where other details of the statistical analysis plan can be   |
| 42 |                                                           |     | found, if not in the protocol <b>p. 15</b>                                 |
| 43 |                                                           | 20b | Methods for any additional analyses (eg, subgroup and adjusted             |
| 44 |                                                           |     | analyses) <b>p. 15-16</b>                                                  |
| 45 |                                                           | 20c | Definition of analysis population relating to protocol non-adherence       |
| 46 |                                                           |     | (eg, as randomised analysis), and any statistical methods to handle        |
| 47 |                                                           |     | missing data (eg, multiple imputation) <b>p. 15-16</b>                     |
| 48 |                                                           |     |                                                                            |
| 49 |                                                           |     |                                                                            |
| 50 |                                                           |     |                                                                            |
| 51 |                                                           |     |                                                                            |
| 52 | <b>Methods: Monitoring</b>                                |     |                                                                            |
| 53 | Data monitoring                                           | 21a | Composition of data monitoring committee (DMC); summary of its role        |
| 54 |                                                           |     | and reporting structure; statement of whether it is independent from       |
| 55 |                                                           |     | the sponsor and competing interests; and reference to where further        |
| 56 |                                                           |     | details about its charter can be found, if not in the protocol.            |
| 57 |                                                           |     | Alternatively, an explanation of why a DMC is not needed                   |
| 58 |                                                           |     | <b>n/a (there are no treatment side effects;</b>                           |
| 59 |                                                           |     | <b>all authors declare responsibility for the</b>                          |
| 60 |                                                           |     | <b>collected data); p. 18</b>                                              |

|    |          |     |                                                                                                                                                                                                                    |
|----|----------|-----|--------------------------------------------------------------------------------------------------------------------------------------------------------------------------------------------------------------------|
| 1  |          | 21b | Description of any interim analyses and stopping guidelines, including who will have access to these interim results and make the final decision to terminate the trial <b>n/a</b>                                 |
| 2  |          |     |                                                                                                                                                                                                                    |
| 3  |          |     |                                                                                                                                                                                                                    |
| 4  |          |     |                                                                                                                                                                                                                    |
| 5  |          |     |                                                                                                                                                                                                                    |
| 6  | Harms    | 22  | Plans for collecting, assessing, reporting, and managing solicited and spontaneously reported adverse events and other unintended effects of trial interventions or trial conduct <b>no treatment side effects</b> |
| 7  |          |     |                                                                                                                                                                                                                    |
| 8  |          |     |                                                                                                                                                                                                                    |
| 9  |          |     |                                                                                                                                                                                                                    |
| 10 |          |     |                                                                                                                                                                                                                    |
| 11 | Auditing | 23  | Frequency and procedures for auditing trial conduct, if any, and whether the process will be independent from investigators and the sponsor <b>n/a</b>                                                             |
| 12 |          |     |                                                                                                                                                                                                                    |
| 13 |          |     |                                                                                                                                                                                                                    |
| 14 |          |     |                                                                                                                                                                                                                    |

### Ethics and dissemination

|    |                               |     |                                                                                                                                                                                                                                                                                                                               |
|----|-------------------------------|-----|-------------------------------------------------------------------------------------------------------------------------------------------------------------------------------------------------------------------------------------------------------------------------------------------------------------------------------|
| 15 |                               |     |                                                                                                                                                                                                                                                                                                                               |
| 16 |                               |     |                                                                                                                                                                                                                                                                                                                               |
| 17 | Research ethics approval      | 24  | Plans for seeking research ethics committee/institutional review board (REC/IRB) approval <b>p. 4 and 18</b>                                                                                                                                                                                                                  |
| 18 |                               |     |                                                                                                                                                                                                                                                                                                                               |
| 19 |                               |     |                                                                                                                                                                                                                                                                                                                               |
| 20 | Protocol amendments           | 25  | Plans for communicating important protocol modifications (eg, changes to eligibility criteria, outcomes, analyses) to relevant parties (eg, investigators, REC/IRBs, trial participants, trial registries, journals, regulators) <b>if substantial changes are made, those are introduced in the published research paper</b> |
| 21 |                               |     |                                                                                                                                                                                                                                                                                                                               |
| 22 |                               |     |                                                                                                                                                                                                                                                                                                                               |
| 23 |                               |     |                                                                                                                                                                                                                                                                                                                               |
| 24 |                               |     |                                                                                                                                                                                                                                                                                                                               |
| 25 |                               |     |                                                                                                                                                                                                                                                                                                                               |
| 26 | Consent or assent             | 26a | Who will obtain informed consent or assent from potential trial participants or authorised surrogates, and how (see Item 32) <b>p. 18</b>                                                                                                                                                                                     |
| 27 |                               |     |                                                                                                                                                                                                                                                                                                                               |
| 28 |                               |     |                                                                                                                                                                                                                                                                                                                               |
| 29 |                               |     |                                                                                                                                                                                                                                                                                                                               |
| 30 |                               | 26b | Additional consent provisions for collection and use of participant data and biological specimens in ancillary studies, if applicable <b>p. 4 and 18</b>                                                                                                                                                                      |
| 31 |                               |     |                                                                                                                                                                                                                                                                                                                               |
| 32 |                               |     |                                                                                                                                                                                                                                                                                                                               |
| 33 | Confidentiality               | 27  | How personal information about potential and enrolled participants will be collected, shared, and maintained in order to protect confidentiality before, during, and after the trial <b>p. 18</b>                                                                                                                             |
| 34 |                               |     |                                                                                                                                                                                                                                                                                                                               |
| 35 |                               |     |                                                                                                                                                                                                                                                                                                                               |
| 36 |                               |     |                                                                                                                                                                                                                                                                                                                               |
| 37 | Declaration of interests      | 28  | Financial and other competing interests for principal investigators for the overall trial and each study site <b>p. 19</b>                                                                                                                                                                                                    |
| 38 |                               |     |                                                                                                                                                                                                                                                                                                                               |
| 39 |                               |     |                                                                                                                                                                                                                                                                                                                               |
| 40 |                               |     |                                                                                                                                                                                                                                                                                                                               |
| 41 | Access to data                | 29  | Statement of who will have access to the final trial dataset, and disclosure of contractual agreements that limit such access for investigators <b>p. 19</b>                                                                                                                                                                  |
| 42 |                               |     |                                                                                                                                                                                                                                                                                                                               |
| 43 |                               |     |                                                                                                                                                                                                                                                                                                                               |
| 44 |                               |     |                                                                                                                                                                                                                                                                                                                               |
| 45 | Ancillary and post-trial care | 30  | Provisions, if any, for ancillary and post-trial care, and for compensation to those who suffer harm from trial participation <b>n/a</b>                                                                                                                                                                                      |
| 46 |                               |     |                                                                                                                                                                                                                                                                                                                               |
| 47 |                               |     |                                                                                                                                                                                                                                                                                                                               |
| 48 | Dissemination policy          | 31a | Plans for investigators and sponsor to communicate trial results to participants, healthcare professionals, the public, and other relevant groups (eg, via publication, reporting in results databases, or other data sharing arrangements), including any publication restrictions <b>p. 18</b>                              |
| 49 |                               |     |                                                                                                                                                                                                                                                                                                                               |
| 50 |                               |     |                                                                                                                                                                                                                                                                                                                               |
| 51 |                               |     |                                                                                                                                                                                                                                                                                                                               |
| 52 |                               |     |                                                                                                                                                                                                                                                                                                                               |
| 53 |                               |     |                                                                                                                                                                                                                                                                                                                               |
| 54 |                               | 31b | Authorship eligibility guidelines and any intended use of professional writers <b>p. 19</b>                                                                                                                                                                                                                                   |
| 55 |                               |     |                                                                                                                                                                                                                                                                                                                               |
| 56 |                               |     |                                                                                                                                                                                                                                                                                                                               |
| 57 |                               |     |                                                                                                                                                                                                                                                                                                                               |
| 58 |                               | 31c | Plans, if any, for granting public access to the full protocol, participant-level dataset, and statistical code                                                                                                                                                                                                               |
| 59 |                               |     | <b>This manuscript/protocol is under consideration for publication in BMJ Open; p. 18-19.</b>                                                                                                                                                                                                                                 |
| 60 |                               |     |                                                                                                                                                                                                                                                                                                                               |

## Appendices

|                            |    |                                                                                                                                                                                                           |
|----------------------------|----|-----------------------------------------------------------------------------------------------------------------------------------------------------------------------------------------------------------|
| Informed consent materials | 32 | Model consent form and other related documentation given to participants and authorised surrogates <small>only available in Portuguese</small>                                                            |
| Biological specimens       | 33 | Plans for collection, laboratory evaluation, and storage of biological specimens for genetic or molecular analysis in the current trial and for future use in ancillary studies, if applicable <b>n/a</b> |

---

\*It is strongly recommended that this checklist be read in conjunction with the SPIRIT 2013 Explanation & Elaboration for important clarification on the items. Amendments to the protocol should be tracked and dated. The SPIRIT checklist is copyrighted by the SPIRIT Group under the Creative Commons "[Attribution-NonCommercial-NoDerivs 3.0 Unported](#)" license.

# BMJ Open

## A skin cancer prevention photoaging intervention for secondary schools in Brazil delivered by medical students: protocol for a randomized controlled trial

|                                 |                                                                                                                                                                                                                                                                                                                                                                                                                                                                                                                                                                                                                                                                                                                                                                                                                                                                                                                                                                                                                                                                                                                                                                                                                                                                                                                                                                                                                                                                                                                                |
|---------------------------------|--------------------------------------------------------------------------------------------------------------------------------------------------------------------------------------------------------------------------------------------------------------------------------------------------------------------------------------------------------------------------------------------------------------------------------------------------------------------------------------------------------------------------------------------------------------------------------------------------------------------------------------------------------------------------------------------------------------------------------------------------------------------------------------------------------------------------------------------------------------------------------------------------------------------------------------------------------------------------------------------------------------------------------------------------------------------------------------------------------------------------------------------------------------------------------------------------------------------------------------------------------------------------------------------------------------------------------------------------------------------------------------------------------------------------------------------------------------------------------------------------------------------------------|
| Journal:                        | <i>BMJ Open</i>                                                                                                                                                                                                                                                                                                                                                                                                                                                                                                                                                                                                                                                                                                                                                                                                                                                                                                                                                                                                                                                                                                                                                                                                                                                                                                                                                                                                                                                                                                                |
| Manuscript ID                   | bmjopen-2017-018299.R2                                                                                                                                                                                                                                                                                                                                                                                                                                                                                                                                                                                                                                                                                                                                                                                                                                                                                                                                                                                                                                                                                                                                                                                                                                                                                                                                                                                                                                                                                                         |
| Article Type:                   | Protocol                                                                                                                                                                                                                                                                                                                                                                                                                                                                                                                                                                                                                                                                                                                                                                                                                                                                                                                                                                                                                                                                                                                                                                                                                                                                                                                                                                                                                                                                                                                       |
| Date Submitted by the Author:   | 05-Dec-2017                                                                                                                                                                                                                                                                                                                                                                                                                                                                                                                                                                                                                                                                                                                                                                                                                                                                                                                                                                                                                                                                                                                                                                                                                                                                                                                                                                                                                                                                                                                    |
| Complete List of Authors:       | <p>Brinker, Titus; University Hospital Heidelberg, Department of Dermatology and National Center for Tumor Diseases (NCT); Universitat Duisburg-Essen, Department of Dermatology, Venerology and Allergology</p> <p>Faria, Bianca; University of Itauna, 35680-142 Itauna, Brazil, School of Medicine</p> <p>Gatzka, Martina; University of Ulm, Department of Dermatology and Allergic Diseases</p> <p>de Faria, Olber; Universidade de Itauna, School of Medicine</p> <p>Heppt, Markus; University Medical Center Munich, Department of Dermatology and Allergology</p> <p>Kirchberger, Michael; University Hospital Erlangen, Friedrich-Alexander-University Erlangen-Nürnberg (FAU), Department of Dermatology</p> <p>Schadendorf, Dirk; University Hospital Essen, University Duisburg-Essen, Essen, Germany, Department of Dermatology, Venerology and Allergology; Universitat Duisburg-Essen, West German Cancer Center</p> <p>Nakamura, Yasuhiro; Saitama Medical University International Medical Center, Department of Skin Oncology / Dermatology</p> <p>Buslaff, Fabian; University Hospital Heidelberg, Department of Dermatology and National Center for Tumor Diseases (NCT)</p> <p>Lisboa, Oscar; Universidade Federal de Ouro Preto, School of Medicine</p> <p>Oliveira, Ana; Universidade de Itauna, School of Medicine</p> <p>Lino, Henrique; University of Itauna, 35680-142 Itauna, Brazil, School of Medicine</p> <p>Bernardes-Souza, Breno; Universidade Federal de Ouro Preto, School of Medicine</p> |
| <b>Primary Subject Heading</b>: | Dermatology                                                                                                                                                                                                                                                                                                                                                                                                                                                                                                                                                                                                                                                                                                                                                                                                                                                                                                                                                                                                                                                                                                                                                                                                                                                                                                                                                                                                                                                                                                                    |
| Secondary Subject Heading:      | Epidemiology, Dermatology, Public health                                                                                                                                                                                                                                                                                                                                                                                                                                                                                                                                                                                                                                                                                                                                                                                                                                                                                                                                                                                                                                                                                                                                                                                                                                                                                                                                                                                                                                                                                       |
| Keywords:                       | DERMATOLOGY, PREVENTIVE MEDICINE, EPIDEMIOLOGY, PUBLIC HEALTH                                                                                                                                                                                                                                                                                                                                                                                                                                                                                                                                                                                                                                                                                                                                                                                                                                                                                                                                                                                                                                                                                                                                                                                                                                                                                                                                                                                                                                                                  |
|                                 |                                                                                                                                                                                                                                                                                                                                                                                                                                                                                                                                                                                                                                                                                                                                                                                                                                                                                                                                                                                                                                                                                                                                                                                                                                                                                                                                                                                                                                                                                                                                |

SCHOLARONE™  
Manuscripts

1  
2  
3 **A skin cancer prevention photoaging intervention for secondary schools in**  
4 **Brazil delivered by medical students: protocol for a randomized controlled trial**  
5  
6  
7

8  
9 Titus J. Brinker<sup>1,2\*</sup>, Bianca Lisa Faria<sup>3</sup>, Martina Gatzka<sup>4</sup>, Olber Moreira de Faria<sup>3</sup>,  
10  
11 Markus V. Heppt<sup>5</sup>, Michael C. Kirchberger<sup>6</sup>, Dirk Schadendorf<sup>2</sup>, Yasuhiro Nakamura<sup>7</sup>,  
12  
13 Fabian Buslaff<sup>1</sup>, Oscar Campos Lisboa<sup>5</sup>, Ana Carla Cruz Oliveira<sup>3</sup>, Henrique Augusto  
14  
15 Lino<sup>3</sup>, Breno Bernardes-Souza<sup>8</sup>  
16  
17  
18  
19

- 20 1. Department of Dermatology and National Center for Tumor Diseases (NCT),  
21 University Hospital Heidelberg, University of Heidelberg, Heidelberg,  
22 Germany  
23
- 24 2. Department of Dermatology, Venerology and Allergology, University Hospital  
25 Essen, University of Duisburg-Essen, 45122 Essen, Germany  
26
- 27 3. School of Medicine, University of Itauna, 35680-142 Itauna, Brazil  
28
- 29 4. Department of Dermatology and Allergic Diseases, University of Ulm, Ulm,  
30 Germany.  
31
- 32 5. Department of Dermatology and Allergology, University Medical Center  
33 Munich, Munich, Germany.  
34
- 35 6. Department of Dermatology, University Hospital Erlangen, Friedrich-  
36 Alexander-University Erlangen-Nürnberg (FAU), 91054, Erlangen, Germany.  
37
- 38 7. Department of Skin Oncology/Dermatology, Saitama Medical University  
39 International Medical Center, Saitama, Japan.  
40
- 41 8. School of Medicine, Federal University of Ouro Preto, 35400-000 Ouro Preto,  
42 Brazil  
43  
44  
45  
46  
47  
48  
49  
50  
51  
52  
53  
54  
55  
56  
57  
58  
59  
60

1  
2  
3 \* Address for correspondence: Titus J. Brinker, Department of Dermatology and  
4 National Center for Tumor Diseases (NCT), University Hospital Heidelberg,  
5 University of Heidelberg, Heidelberg, Germany; E-mail: [titus.brinker@gmail.com](mailto:titus.brinker@gmail.com);  
6  
7 Telephone number: +4915175084347  
8  
9  
10  
11  
12

13 **E-Mails:** [titus.brinker@gmail.com](mailto:titus.brinker@gmail.com) (TJB), [biancalisadefaria@outlook.com](mailto:biancalisadefaria@outlook.com) (BLF),  
14  
15 [martina.gatzka@uni-ulm.de](mailto:martina.gatzka@uni-ulm.de) (MG), [olbermoreira@uol.com.br](mailto:olbermoreira@uol.com.br) (OMF),  
16  
17 [Markus.Heppt@med.uni-muenchen.de](mailto:Markus.Heppt@med.uni-muenchen.de) (MVH), [michael.kirchberger@uk-erlangen.de](mailto:michael.kirchberger@uk-erlangen.de)  
18  
19 (MCK), [Dirk.Schadendorf@uk-essen.de](mailto:Dirk.Schadendorf@uk-essen.de) (DS), [ynakamur@saitama-med.ac.jp](mailto:ynakamur@saitama-med.ac.jp) (YN),  
20  
21 [fabian.buslaff@fau.de](mailto:fabian.buslaff@fau.de) (FB), [oscarlisboa17@gmail.com](mailto:oscarlisboa17@gmail.com) (OCL),  
22  
23 [anacarlaco@outlook.com](mailto:anacarlaco@outlook.com) (ACCO), [henriquelino@live.co.uk](mailto:henriquelino@live.co.uk) (HAL),  
24  
25 [brenoneps@gmail.com](mailto:brenoneps@gmail.com) (BBS)  
26  
27  
28  
29  
30  
31  
32

33 Manuscript version: 3 (minor revision was made to the original protocol after  
34 reviewers' comments)  
35  
36  
37  
38  
39  
40  
41  
42  
43  
44  
45  
46  
47  
48  
49  
50  
51  
52  
53  
54  
55  
56  
57  
58  
59  
60



## ABSTRACT

### Introduction

The incidence of melanoma is increasing faster than any other major cancer both in Brazil and worldwide. The southeast of Brazil has especially high incidences of melanoma, and early detection is low. Exposure to UV radiation represents a primary risk factor for developing melanoma. Increasing attractiveness is a major motivation for adolescents for tanning. A medical student-delivered intervention that harnesses the broad availability of mobile phones as well as adolescents' interest in their appearance may represent a novel method to improve skin cancer prevention.

### Methods and Analysis

We developed a free mobile app ("Sunface"), which will be implemented in at least 30 secondary school classes, each with 21 students (at least 30 classes with 21 students for control) in February 2018 in Southeast Brazil via a novel method called mirroring. In a 45-minute classroom seminar, the students' altered three-dimensional selfies on tablets are "mirrored" via a projector in front of their entire class, showing the effects of unprotected UV exposure on their future faces. External block

1  
2  
3 randomization via computer is performed on the class level with a 1:1 allocation.  
4 Sociodemographic data, as well as skin type, ancestry, UV protection behavior and  
5 its predictors are measured via a paper-pencil questionnaire before as well as three  
6 and six months post-intervention. The primary endpoint is the group difference in the  
7 30-day prevalence of daily sunscreen use at a six-month follow-up. Secondary  
8 endpoints include (1) the difference in daily sunscreen use at a three-month follow-  
9 up, (2) if a self-skin exam in accordance with the ABCDE rule was performed within  
10 the six-month follow-up and (3) the number of tanning sessions.  
11  
12  
13  
14  
15  
16  
17  
18  
19  
20

21 **Ethics and dissemination:** Ethical approval was obtained from the ethics committee  
22 of the University of Itauna. Results will be disseminated at conferences and in peer-  
23 reviewed journals.  
24  
25  
26  
27

28 **Trial Registration:** #NCT03178240  
29  
30  
31  
32  
33  
34  
35  
36  
37  
38  
39  
40  
41  
42  
43  
44  
45  
46  
47  
48  
49  
50  
51  
52  
53  
54  
55  
56  
57  
58  
59  
60

## Strengths and limitations of this study

- This is the first study measuring the longitudinal effectiveness of a photoaging mobile app to change sun protection behavior.
- External randomization via computer and a relatively high number of clusters ensure good comparability between groups.
- Cluster effects cannot be excluded because the intervention and control classes are located in the same schools.

## Introduction

According to the World Health Organization, the incidence of melanoma is increasing more rapidly than any other major cancer both in Brazil and worldwide. Melanoma is one of the most common cancers in young adults and poses substantial health and economic burdens [1].

Approximately 90% of melanomas are associated with UV exposure, in particular with the frequency of severe sunburns, and are therefore highly preventable [2].

Multiple studies showed that daily sunscreen use with a sun protection factor (SPF)

1  
2  
3 above 30, as recommended by international dermatology guidelines, may prevent  
4  
5 sunburns and skin cancer including melanoma [3-6].  
6  
7

8 Brazil has one of the highest UV indexes on earth; additionally, tanning is culturally  
9  
10 established and Brazilians commonly experience unprotected overexposure to the  
11  
12 sun, especially in their childhood and teenage years [7-11]. In a 2008 population-  
13  
14 based survey with 1,604 participants in the south of Brazil, 48.7% reported at least  
15  
16 one sunburn in the prior year [10]. In an attempt to mitigate the health damage  
17  
18 caused by excessive UV exposure, Brazil was the first country to prohibit indoor  
19  
20 tanning in 2009, albeit with limited success [9]. The southeast of Brazil (the location  
21  
22 of this study) is especially populated by citizens with a European ancestry and  
23  
24 therefore has high incidences of melanoma (up to 23.5/100,000 inhabitants) with a  
25  
26 lack of early diagnosis and an overall survival below worldwide rates [12-15].  
27  
28  
29

30  
31 Interventions encouraging sun protection habits are important, particularly among  
32  
33 adolescents, as increased risk of skin cancer is associated with cumulative UV  
34  
35 exposure and sunburns early in life [16-18]. In line with this association, various  
36  
37 recent experimental studies to test these effects in young target groups aimed at  
38  
39 promoting sunscreen use as an end point [19-22], and others used various UV  
40  
41 protection behaviors (including avoiding sunbeds) or behavior scores [23-32]. Given  
42  
43 the substantial amount of time that children and adolescents spend in the school  
44  
45 environment, addressing skin cancer prevention in this setting is crucial and provides  
46  
47 a unique opportunity to propel skin cancer prevention programs [33].  
48  
49  
50

51  
52  
53  
54 Despite the effectiveness of daily sunscreen and its implementation in international  
55  
56 dermatologic guidelines [34], a study conducted in Brazil among 398 medical  
57  
58  
59

1  
2  
3 students from the city of Curitiba showed that only 8.4% use sunscreen daily, 4.3%  
4 had already used tanning beds and 85.5% had past sunburns despite having  
5 undergone a clinical rotation in a Dermatology department [8]. The lack of exemplary  
6 behavior among prospective physicians regarding skin cancer prevention is known  
7 on a global scale [35-37]. The authors of this study have concluded that novel  
8 engagement methods are needed to answer the increasing demand for skin cancer  
9 awareness among physicians.  
10

11  
12 The Sunface mirroring intervention aims to provide science-based skin cancer  
13 prevention to a large number of adolescents in an attempt to sensitize prospective  
14 physicians to the importance of exemplary behavior [38, 39].  
15  
16

#### 17 18 19 20 21 22 23 24 25 26 *Current knowledge on school-based skin cancer prevention*

27  
28 Unhealthy behavior with respect to UV exposure is mostly initiated in early  
29 adolescence [40], commonly with the belief that a tan increases attractiveness [41-  
30 43] and the problems related to melanoma as well as skin atrophy are too far in the  
31 future to fathom.  
32  
33  
34  
35  
36  
37  
38  
39  
40

41 A recent randomized trial with Australian high school students demonstrated that  
42 appearance-based videos on UV-induced premature aging were superior in  
43 encouraging sunscreen use to videos of the same length focusing exclusively on  
44 health aspects [19]. These findings are in line with international studies  
45 demonstrating the important influence of self-perceived attractiveness on self-esteem  
46 in adolescence [44, 45]. Furthermore, enhancing one's attractiveness is a primary  
47 motivation for tanning in adolescents both in Brazil and worldwide [41, 46, 47]. In  
48 addition, the success of appearance-based photoaging intervention mobile apps, in  
49  
50  
51  
52  
53  
54  
55  
56  
57  
58  
59  
60

1  
2  
3 which an image is altered to predict future appearance in the fields of tobacco and  
4 adiposity prevention, shows promise for these interventions in behavioral change  
5 settings [48-53].  
6  
7  
8

9  
10 In the setting of skin cancer prevention, a quasi-experimental study by Williams et al.  
11 demonstrated significantly higher scores for predictors of sun protection behavior in  
12 young women from the UK (70 participants in total) using a photoaging desktop  
13 program [54]. Furthermore, the photoaging software 'showed promising reduction in  
14 young adults' tanning intentions in a study with ten participants in total (7 female and  
15 3 male) [55]. However, prior studies are limited by their small sample size and  
16 limitations related to expanding the target population.  
17  
18  
19  
20  
21  
22  
23  
24  
25  
26  
27  
28  
29  
30

### 31 **Introduction of the Sunface app**

32  
33  
34 We harnessed the widespread availability of mobile phones and adolescents'  
35 interest in appearance to develop the free mobile phone app "Sunface," which  
36 enables the user take a selfie and then offers three categories: "daily sun  
37 protection", "no sun protection" and "weekly tanning," showing the altered face at 5  
38 to 25 years in the future (Figure 1, Figure 2, Figure 3, Figure 4). All effects are based  
39 on the individual skin type that the user can choose at the start of the app (Figure 5).  
40  
41 The app also shows the most common UV-induced skin cancers via extra buttons  
42 and calculates how the odds ratio is increased with different behaviors. In addition,  
43 the app gives advice on sun protection, explains the facial changes and encourages  
44 skin examinations using the ABCDE rule (assess border irregularity, color variety,  
45 diameter, and evolution [56]).  
46  
47  
48  
49  
50  
51  
52  
53  
54  
55  
56  
57  
58  
59  
60

1  
2  
3 Afterwards, the app offers many sharing options (animated video or photo) with  
4 family and friends. By this means, the social network of the user may also be  
5 informed about the various photoaging effects of excessive UV exposure and  
6 potential health consequences, as well as potentially learning about the benefits of  
7 using the app [57].  
8  
9  
10  
11  
12

13  
14 To produce realistic effects (Figure 6) and to show the user realistic odds ratios for  
15 the options they choose in the app for the three most strongly associated skin  
16 pathologies, an extensive review of the current literature on UV-induced skin  
17 damage [58, 59] was conducted for each specific skin type. As no trials with 25  
18 years of follow-up were available, we had to extrapolate the current evidence on UV-  
19 induced skin damage for the specific skin types. The evidence consists of more than  
20 50 publications to create realistic effects from a clinician's standpoint (which may  
21 differ from what the average person perceives as realistic).  
22  
23  
24  
25  
26  
27  
28  
29  
30  
31

32  
33 We recently implemented this app in 2 German secondary schools via a method  
34 called mirroring. We "mirrored" the students' altered 3-dimensional (3D) selfies on  
35 mobile phones or tablets via a projector in front of their entire grade. Using an  
36 anonymous questionnaire, we then measured sociodemographic data as well as risk  
37 factors for melanoma and the perceptions of the intervention on a 5-point Likert  
38 scale among 205 students of both sexes aged 13-19 years (median 15 years).  
39  
40  
41  
42  
43  
44  
45

46  
47 In our pilot study, we found more than 60% agreement in both items measuring  
48 motivation to reduce UV exposure and only 12.5% disagreement: 126 (63.0%)  
49 agreed or strongly agreed that their 3D selfie motivated them to avoid using a  
50 tanning bed, and 124 (61.7%) agreed or strongly agreed to increase use of sun  
51  
52  
53  
54  
55  
56  
57  
58  
59  
60

1  
2  
3 protection; only 25 (12.5%) disagreed with both items. However, no effects on actual  
4  
5 behavior could be measured due to the cross-sectional design of the study [60].  
6  
7  
8  
9

10 This randomized trial was designed to answer the following questions:

11  
12  
13 Is the implementation of the app in secondary schools in southeastern Brazil effective  
14  
15 in encouraging daily sunscreen use among adolescents? Is it equally effective for  
16  
17 both genders? Is it effective for the most sensitive skin types? How does the app  
18  
19 intervention change the attitudes towards sun protection in accordance with the  
20  
21 theory of planned behavior [61]?  
22  
23  
24  
25

## 26 27 Methods and Analysis

### 28 29 Study Design

30  
31  
32  
33 The Sunface trial is designed as a randomized controlled superiority trial with two  
34  
35 parallel groups. Our primary end point is the difference between the two groups in  
36  
37 daily sunscreen use (past 30 days) from baseline to six months follow-up (Figure 7).  
38  
39 The planned study period is February 2018 to November 2018. The study groups will  
40  
41 consist of randomized classes receiving the intervention and control classes within  
42  
43 the same schools (no intervention). Randomization is externally and centrally  
44  
45 performed at the school level with a 1:1 allocation (control:intervention) via computer  
46  
47 [12]. A total of at least 60 secondary school classes in Itauna, Brazil will participate in  
48  
49 the teacher-supervised baseline survey in February 2018, which is conducted by  
50  
51 trained data collectors. One week after the baseline survey, the intervention classes  
52  
53 receive a 45-minute app-based intervention conducted by local medical student  
54  
55 volunteers. Follow-up surveys will be conducted 3 and 6 months post-intervention.  
56  
57  
58  
59  
60



## Figure 7

### Intervention

The school-based intervention under evaluation consists of a 45-minute educational module in the classroom setting using a photoaging app. The intervention is presented by 2 medical students per classroom to approximately 21 students at a time. The goal is to initiate and guide the student evaluation process of skin cancer prevention with age-appropriate information that helps the students reframe positive opinions and views regarding sun protection habits in a gain-framed and interactive manner.

To integrate app-based photoaging interventions into a school-based setting, we previously developed and tested the mirroring approach in a pilot study [49].

Mirroring means that the students' altered three-dimensional selfies on smartphones or tablets are "mirrored" via a projector in front of the entire class. The mirroring approach is implemented by medical student volunteers from the University of Itana, who receive standardized training in advance. To ensure the participation of all students within a certain class and to avoid contamination within schools, we will implement the mirroring intervention via 10 Samsung Galaxy Tablets that are already set up and brought to the schools by the volunteers.

In the first 10-minute phase, the displayed face of one student volunteer is used to show the app's altered features in the three categories to the peer group, providing an incentive for the rest of the class to test the app. Students can interact with their own animated face via touch (see Multimedia Appendix 1). In front of their peers, they will be able to display their image as a non-/sun protection user/weekly tanning bed user at 5, 10, 15, 20 and 25 years in the future (see Figure 1 and Figure 2).

1  
2  
3 Multiple device displays can be projected simultaneously, which are used to  
4 consolidate the altered measures with graphics (e.g., to explain wrinkle formation).

5  
6  
7 We implement mirroring with Galaxy Tab A (Samsung) via Apple's proprietary  
8  
9 AirPlay interface using the Android app "Mirroring360" (Splashtop Inc.).  
10

11  
12  
13 <Multimedia Appendix 1 uploaded as an additional file>  
14

15  
16  
17  
18 In the second 15-minute phase, students are encouraged to try the app on one of the  
19  
20 tablet computers. The number of provided tablet computers was calculated so that  
21  
22 the phase would take up to 12 minutes at the most after factoring in a utilization time  
23  
24 of approximately 4 minutes per student. By this calculation, 25 minutes of the  
25  
26 mirroring intervention and 10 provided tablets were sufficient to have every student  
27  
28 within a class of 40 pupils successfully photoaged at least once.  
29

30  
31 In the following 15 minutes, the remaining functions of the app are discussed with the  
32  
33 students: facial changes, the ABCDE rule and the guidelines for sun protection are  
34  
35 addressed in an interactive setting. At the end of the classroom seminar, we ask for  
36  
37 the students' final judgments on daily sunscreen use to create positive peer pressure  
38  
39 and influence the students' subjective norm in accordance with the theory of planned  
40  
41 behavior [61].  
42

43  
44 In the last 5 minutes, the perception of the intervention by the students is measured  
45  
46 directly after the intervention in an anonymous survey on a 5-point Likert scale via  
47  
48 four items: (1) "The animation of my 3D selfie motivates me to use daily sunscreen,"  
49  
50 (2) "I learned new benefits of sun protection," (3) "The intervention motivates me to  
51  
52 check my skin with the ABCDE rule in the next six months," and (4) "The intervention  
53  
54 was fun."  
55

## Participants

### ***Eligibility criteria at baseline***

Students from Itauna in southeast Brazil attending grades 6 to 12 in all types of regular secondary school are eligible.

### ***Contaminated classes***

All classes will be included in the final intention-to-treat analysis. However, app use will be assessed in both groups at six months follow-up to assess contamination of control classes and will be the basis for a secondary (sensitivity) analysis with the methods described in the Analysis section of this protocol.

## Procedure

The schools are recruited via E-mail, telephone and personal appointment (in most cases with the principal). Reasons for non-participation are not recorded. Data are collected via a paper-pencil questionnaire. In addition to sociodemographic data (age, gender and school type), the questionnaire captures the Fitzpatrick skin type, the ancestry of the school students [62] and the frequency of sunscreen use in the past 30 days as well as other sun protection behaviors. These items are based on the sun exposure and protection index questionnaire [63] and were either used in their original form or adapted to the specific circumstances of the present study. No Portuguese equivalents of the instruments were available; thus, we used the Conceptual Method for translation described by the WHO/UNESCAP Project on Health and Disability Statistics [64]. Newly translated and/or modified items were extensively pretested and subjected to statistical analyses (internal consistency/Cronbach's  $\alpha$  and exploratory and confirmatory factor analyses, which represented the basis for item selection).

## Data Collection

Each data collector received training for data collection and was required to use an adapted standardized protocol for data collection, an optimized version of that used in the Smokerface randomized trial [65].

## Cluster randomization

In accordance with the guidelines for good epidemiologic practice, classes within schools are externally and centrally randomly assigned to the control or intervention group via block randomization in a 1:1 ratio (control:intervention) via computer by a statistician at the University of Duisburg-Essen, Germany. Stratification will be performed by grade.

## Outcomes

The primary endpoint is the difference in the 30-day-prevalence of daily sunscreen use between both groups at six months follow-up. Secondary endpoints include the difference in daily sunscreen use at three months follow-up if a self-skin exam in accordance with the ABCDE rule [56] was performed within the six-month follow-up and the number of tanning sessions in the past 30 days. For all end points, the number needed to treat will also be calculated. A daily sunscreen user is defined as a pupil who claims to have used sunscreen daily in the 30 days preceding the survey.

## Statistical considerations

### *Sample size calculation*

1  
2  
3 We calculated sample sizes of 630 in the intervention group and 630 in the control  
4 group, which were obtained by sampling 30 classes with 21 students each in the  
5 intervention group and 30 classes with 21 students each in the control group to  
6 achieve 80% power to detect a prevalence difference between the groups of 5%. The  
7 daily sunscreen prevalence was assumed to be 6% under the null hypothesis and  
8 11% under the alternative hypothesis based on a small pilot survey with 150 students  
9 in Itauna. The test statistic used is the two-sided score test (Farrington & Manning).  
10  
11 The significance level of the test is 0.05. Normal class size in Brazil is 35 pupils; a  
12 lost to follow-up effect of 40% was taken into account.  
13  
14  
15  
16  
17  
18  
19  
20  
21  
22  
23

#### 24 *Data entry*

25  
26 Data entry will be supported by the current software version of Formic Fusion by  
27 Xerox AG (Kloten, Switzerland) and the recommended scanners.  
28  
29  
30  
31  
32

#### 33 *Analysis*

34  
35 To examine baseline differences in pupils' characteristics in our experimental design,  
36 we will use  $\chi^2$  tests for categorical variables and t-tests for continuous variables. To  
37 test for between-group differences in baseline and follow-up daily sunscreen use in  
38 the past 30 days, we will use a cluster-adjusted Mantel-Haenszel  $\chi^2$  test [66] with a  
39 significance level of 5% (two-sided). For the main analysis, HLM (hierarchical linear  
40 models) will be applied. HLM can handle the nested structure of the data and will be  
41 used to test for between-group differences in within-group changes in sun protection  
42 behavior over time. HLM will also be used to investigate the influence of further  
43 covariates (such as gender, European ancestry and skin type) and time-dependent  
44 behavior in secondary analyses. Statistical analyses will be performed using SPSS  
45 Statistics (IBM Corporation, New York, USA).  
46  
47  
48  
49  
50  
51  
52  
53  
54  
55  
56  
57  
58  
59  
60

1  
2  
3 The effect that missing data may have on results will be assessed via sensitivity  
4 analysis. Dropouts (essentially participants who withdraw consent for continued  
5 follow-up or who are missing from the classroom during the survey) will be included  
6 in the analysis, and multiple imputation will be used to estimate the treatment effect  
7 [67].  
8  
9  
10  
11  
12  
13  
14  
15

## 16 Discussion

17  
18  
19 This is the first cluster-randomized school-based trial on photoaging skin cancer  
20 prevention and the first trial on medical student-delivered school-based skin cancer  
21 prevention worldwide. While classic health educational school-based approaches in  
22 skin cancer prevention were evaluated as inferior to appearance-based approaches  
23 [19], there is a global lack of novel, innovative strategies that harness current  
24 technology while taking widely accepted theories for behavioral change into account  
25 [61]. Although multiple studies have shown that skin cancer risk is predominantly  
26 associated with sun exposure early in life, there is often a lack of awareness in risk  
27 groups.  
28  
29  
30  
31  
32  
33  
34  
35  
36  
37  
38  
39

40 Thus, this trial provides the opportunity to evaluate an innovative, highly scalable,  
41 appearance-based intervention in a high-risk population. It will also provide data to  
42 estimate whether photoaging mobile apps have the potential to be broadly  
43 implemented in schools via the mirroring intervention but also via other avenues (i.e.,  
44 posters [65] or smartphone-based advertising campaigns in the App Store and  
45 Google Play Store) or could be a valuable addition to existing educational programs.  
46  
47 Additionally, because it is delivered by medical students, this trial also sensitizes  
48 future physicians to the importance of skin cancer prevention, highlighting their  
49 associated responsibilities within communities [35, 68].  
50  
51  
52  
53  
54  
55  
56  
57  
58  
59  
60

1  
2  
3 According to the theory of planned behavior (TPB), the subjective norm and the  
4 expected self-efficacy of the participants play a substantial role in their resulting  
5 behavior. For example: What do their peers think about tanning? Is the result of  
6 tanning regarded as attractive and does it therefore increase one's chances of finding  
7 a boy/girlfriend? How likely is it that a behavioral change can positively influence this  
8 reaction? The mirroring intervention triggers strong reactions of the peer group of the  
9 individual participant towards their photoaged future self (=affecting subjective norm)  
10 but also illustrates the power of one's own behavioral change (and thereby increases  
11 one's expectation of self-efficacy, another predictor of the TPB) to influence this  
12 reaction by peers [49].  
13  
14  
15  
16  
17  
18  
19  
20  
21  
22  
23  
24

### 25 *Limitations*

26  
27  
28 Because this study is conducted only in Brazil, the results may not be generalizable  
29 to other cultural or national settings. However, the theoretical basis for this  
30 intervention (the theory of planned behavior) has been proven to apply to most  
31 cultural contexts around the globe [61]. As this trial enrolls approximately 10 different  
32 public schools, it should be representative for most school types.  
33  
34  
35  
36  
37  
38  
39

40 We must choose classes and not schools as a cluster due to sample size limitations;  
41 thus, cluster effects cannot be entirely excluded. However, multiple steps are taken  
42 to limit contamination between the control and intervention classes (i.e., the name of  
43 the app is not mentioned to the pupils by the trained medical students, and the  
44 teachers of the control classes are strictly prohibited to talk about the intervention  
45 with their students). Cluster effects are also monitored in the endline questionnaire  
46 and provide a basis for a sensitivity analysis.  
47  
48  
49  
50  
51  
52  
53  
54

55  
56  
57 Some students may find the effects of the Sunface App unrealistic, as indicated in  
58  
59  
60

1  
2  
3 our recently published pilot study. However, this does not appear to attenuate  
4  
5 motivation to adhere to UV protection behavior [60].  
6  
7

8 (Tracked Change: We removed the paragraph on this being the first RCT on  
9  
10 photoaging mobile apps for melanoma prevention as this was already stated in the  
11  
12 Strengths and Limitations section.)  
13  
14

15  
16 In summary, we evaluate the long-term effects on behavior of a novel method that  
17  
18 integrates photoaging in a school-based skin cancer prevention program in a  
19  
20 population with a high risk for developing skin cancer. The program affects the  
21  
22 students' peer group and also considers predictors for tanning.  
23  
24

### 25 26 **Ethics and Dissemination** 27

28 Participation is voluntary and oral consent is sufficient. The ethics committee of the  
29  
30 University of Itauna waived the necessity for informed written consent. All participant  
31  
32 information will be stored in locked file cabinets in areas with limited access. The  
33  
34 participants' study information will not be released outside the study without the  
35  
36 written permission of the participant. Results will be disseminated at conferences, in  
37  
38 peer-reviewed journals and on our websites.  
39  
40  
41  
42  
43  
44  
45

### 46 **Acknowledgements** 47

48  
49 The authors would like to thank all participating schools, students, volunteering  
50  
51 medical students and teachers who helped organize the classroom visits in the city of  
52  
53 Itauna.  
54  
55  
56  
57  
58  
59  
60



## Authors' Contributions

TJB initiated the study, invented, designed and organized the intervention, wrote the manuscript, drafted the design of the study and will perform the statistical analyses. BBS participated in the conception of the study. MVH, MCK, YN, MG, FB and DS contributed to the design of the study and data analyses and proofread the manuscript. BBS and OCL contributed to the design and logistics of the study, assisted with the translation of classroom materials and reviewed the final version of the manuscript. BLF, OMF, HAL and ACCO will conduct data entry and coordinate/conduct the intervention in Brazil. They also supported the translation of the classroom materials and proofread the manuscript. All authors declare responsibility for the data and findings presented and have full access to the final trial dataset.

## Conflicts of Interest

None declared.

## Funding

The tablets are funded by the Young Research Award Research Grant from La Fondation La Roche Posay awarded to Titus J. Brinker for his research on the Sunface app. The University of Itauna will contribute by providing logistic support for the project and copies of all questionnaires. La Fondation La Roche Posay (LA FONDATION LA ROCHE-POSAY, Att : Cécile Voletm 62 quai Charles Pasqua, 92300 LEVALLOIS PERRET, France) and the University of Itauna Funding Board had no role in the design and conduction of this study or in the preparation, review or approval of this manuscript,

1. Livingstone E, Windemuth-Kieselbach C, Eigentler TK, Rompel R, Trefzer U, Nashan D, Rotterdam S, Ugurel S, Schadendorf D: **A first prospective population-based analysis investigating the actual practice of melanoma diagnosis, treatment and follow-up.** *European Journal of Cancer* 2011, **47**(13):1977-1989.
2. The Lancet Editorial Board: **Skin cancer: prevention is better than cure.** *The Lancet* 2014, **384**(9942):470.
3. Green AC, Williams GM, Logan V, Strutton GM: **Reduced melanoma after regular sunscreen use: randomized trial follow-up.** *Journal of Clinical Oncology* 2010, **29**(3):257-263.
4. Ghiasvand R, Weiderpass E, Green AC, Lund E, Veierød MB: **Sunscreen use and subsequent melanoma risk: A population-based cohort study.** *Journal of Clinical Oncology* 2016, **34**(33):3976-3983.
5. Nijsten T: **Sunscreen Use in the Prevention of Melanoma: Common Sense Rules.** In: American Society of Clinical Oncology; 2016.
6. Ou-Yang H, Jiang LI, Meyer K, Wang SQ, Farberg AS, Rigel DS: **Sun Protection by Beach Umbrella vs Sunscreen With a High Sun Protection Factor: A Randomized Clinical Trial.** *JAMA dermatology* 2017, **153**(3):304-308.
7. Benvenuto - Andrade C, Zen B, Fonseca G, Villa D, Cestari T: **Sun Exposure and Sun Protection Habits Among High - school Adolescents in Porto Alegre, Brazil.** *Photochemistry and photobiology* 2005, **81**(3):630-635.
8. Purim KSM, Wroblewski FC: **Sun exposure and protection among medical students in curitiba (PR).** *Revista Brasileira de Educação Médica* 2014, **38**(4):477-485.
9. Schalka S, Steiner D, Ravelli FN, Steiner T, Terena AC, Marçon CR, Ayres EL, Addor FASa, Miot HA, Ponzio H: **Brazilian consensus on photoprotection.** *Anais brasileiros de dermatologia* 2014, **89**(6):1-74.
10. Haack RL, Horta BL, Cesar JA: **Sunburn in young people: population-based study in Southern Brazil.** *Revista de Saúde Pública* 2008, **42**(1):26-33.
11. Silva AA: **Outdoor Exposure to Solar Ultraviolet Radiation and Legislation in Brazil.** *Health physics* 2016, **110**(6):623-626.
12. Lima ASd, Stein CE, Casemiro KP, Rovere RK: **Epidemiology of Melanoma in the South of Brazil: study of a city in the Vale do Itajaí from 1999 to 2013.** *Anais brasileiros de dermatologia* 2015, **90**(2):185-189.
13. de Lima Vazquez V, Silva TB, de Andrade Vieira M, de Oliveira ATT, Lisboa MV, de Andrade DAP, Fregnani JHTG, Carneseca EC: **Melanoma characteristics in Brazil: demographics, treatment, and survival analysis.** *BMC research notes* 2015, **8**(1):4.
14. Amancio CT, Nascimento LFC: **Cutaneous melanoma in the State of São Paulo: a spatial approach.** *Anais brasileiros de dermatologia* 2014, **89**(3):442-446.
15. Naser N: **Cutaneous melanoma: a 30-year-long epidemiological study conducted in a city in southern Brazil, from 1980-2009.** *Anais brasileiros de dermatologia* 2011, **86**(5):932-941.
16. Lo JA, Fisher DE: **The melanoma revolution: from UV carcinogenesis to a new era in therapeutics.** *Science* 2014, **346**(6212):945-949.
17. Wu S, Han J, Laden F, Qureshi AA: **Long-term ultraviolet flux, other potential risk factors, and skin cancer risk: a cohort study.** *Cancer Epidemiology and Prevention Biomarkers* 2014, **23**(6):1080-1089.
18. Barton MK: **Indoor tanning increases melanoma risk, even in the absence of a sunburn.** *CA: a cancer journal for clinicians* 2014, **64**(6):367-368.

19. Tuong W, Armstrong AW: **Effect of appearance-based education compared with health-based education on sunscreen use and knowledge: a randomized controlled trial.** *Journal of the American Academy of Dermatology* 2014, **70**(4):665-669.
20. Craciun C, Schüz N, Lippke S, Schwarzer R: **Facilitating sunscreen use in women by a theory-based online intervention: A randomized controlled trial.** *Journal of health psychology* 2012, **17**(2):207-216.
21. Hirst NG, Gordon LG, Scuffham PA, Green AC: **Lifetime cost-effectiveness of skin cancer prevention through promotion of daily sunscreen use.** *Value in Health* 2012, **15**(2):261-268.
22. Sakoufaki M, Stergiopoulou A, Stratigos A: **Design and implementation of a health promotion program to prevent the harmful effects of ultraviolet radiation at primary school students of rural areas of Greece.** *International Journal of Research in Dermatology* 2017.
23. Miller K, Langholz B, Ly T, Harris S, Richardson J, Peng D, Cockburn M: **SunSmart: evaluation of a pilot school-based sun protection intervention in Hispanic early adolescents.** *Health education research* 2015:cyv011.
24. Aarestrup C, Bonnesen CT, Thygesen LC, Krarup AF, Waagstein AB, Jensen PD, Bentzen J: **The effect of a school-based intervention on sunbed use in Danish pupils at continuation schools: a cluster-randomized controlled trial.** *Journal of Adolescent Health* 2014, **54**(2):214-220.
25. Holman DM, Fox KA, Glenn JD, Guy GP, Watson M, Baker K, Cokkinides V, Gottlieb M, Lazovich D, Perna FM: **Strategies to reduce indoor tanning: current research gaps and future opportunities for prevention.** *American journal of preventive medicine* 2013, **44**(6):672-681.
26. Hillhouse J, Turrisi R, Scaglione NM, Cleveland MJ, Baker K, Florence LC: **A Web-Based Intervention to Reduce Indoor Tanning Motivations in Adolescents: a Randomized Controlled Trial.** *Prevention Science* 2016:1-10.
27. Stapleton JL, Hillhouse J, Levonyan-Radloff K, Manne SL: **Review of Interventions to Reduce Ultraviolet Tanning: Need for Treatments Targeting Excessive Tanning, An Emerging Addictive Behavior.** 2017.
28. Olson AL, Gaffney C, Starr P, Gibson JJ, Cole BF, Dietrich AJ: **SunSafe in the middle school years: a community-wide intervention to change early-adolescent sun protection.** *Pediatrics* 2007, **119**(1):e247-e256.
29. Miller KA, Huh J, Unger JB, Richardson JL, Allen MW, Peng DH, Cockburn MG: **Patterns of sun protective behaviors among Hispanic children in a skin cancer prevention intervention.** *Preventive medicine* 2015, **81**:303-308.
30. Turner D, Harrison SL, Buettner P, Nowak M: **Does being a "SunSmart School" influence hat-wearing compliance? An ecological study of hat-wearing rates at Australian primary schools in a region of high sun exposure.** *Preventive medicine* 2014, **60**:107-114.
31. Buller DB, Andersen PA, Walkosz BJ, Scott MD, Beck L, Cutter GR: **Rationale, design, samples, and baseline sun protection in a randomized trial on a skin cancer prevention intervention in resort environments.** *Contemporary clinical trials* 2016, **46**:67-76.
32. Sontag JM, Noar SM: **Assessing the Potential Effectiveness of Pictorial Messages to Deter Young Women from Indoor Tanning: An Experimental Study.** *Journal of Health Communication* 2017, **22**(4):294-303.
33. Guy GP, Holman DM, Watson M: **The Important Role of Schools in the Prevention of Skin Cancer.** *Jama dermatology* 2016, **152**(10):1083-1084.

- 1  
2  
3 34. Farberg AS, Glazer AM, Rigel AC, White R, Rigel DS: **Dermatologists' Perceptions, Recommendations, and Use of Sunscreen.** *Jama dermatology* 2017, **153**(1):99-101.
- 4  
5  
6 35. Isvy A, Beauchet A, Saiag P, Mahé E: **Medical students and sun prevention: knowledge and behaviours in France.** *Journal of the European Academy of Dermatology and Venereology* 2013, **27**(2):e247-e251.
- 7  
8  
9 36. Nanyes JE, McGrath JM, Krejci-Manwaring J: **Medical Students' Perceptions of Skin Cancer: Confusion and Disregard for Warnings and the Need for New Preventive Strategies.** *Archives of dermatology* 2012, **148**(3):392-393.
- 10  
11  
12 37. Patel SS, Nijhawan RI, Stechschulte S, Parmet Y, Rouhani P, Kirsner RS, Hu S: **Skin cancer awareness, attitude, and sun protection behavior among medical students at the University of Miami Miller School of Medicine.** *Archives of dermatology* 2010, **146**(7):797-800.
- 13  
14  
15  
16 38. Brinker TJ, Stamm-Balderjahn S, Seeger W, Klingelhöfer D, Groneberg DA: **Education Against Tobacco (EAT): a quasi-experimental prospective evaluation of a multinational medical-student-delivered smoking prevention programme for secondary schools in Germany.** *BMJ open* 2015, **5**(9):e008093.
- 17  
18  
19  
20  
21 39. Brinker TJ, Stamm-Balderjahn S, Seeger W, Groneberg DA: **Education Against Tobacco (EAT): a quasi-experimental prospective evaluation of a programme for preventing smoking in secondary schools delivered by medical students: a study protocol.** *BMJ Open* 2014, **4**(7):e004909.
- 22  
23  
24  
25 40. Görig T, Diehl K, Greinert R, Breitbart EW, Schneider S: **Prevalence of sun-protective behaviour and intentional sun tanning in German adolescents and adults: results of a nationwide telephone survey.** *Journal of the European Academy of Dermatology and Venereology* 2017, **Volume 31**(Issue 6):Pages 913–1077, e1273–e1306.
- 26  
27  
28  
29  
30 41. Schneider S, Diehl K, Bock C, Schlüter M, Breitbart EW, Volkmer B, Greinert R: **Sunbed use, user characteristics, and motivations for tanning: results from the German population-based SUN-Study 2012.** *JAMA dermatology* 2013, **149**(1):43-49.
- 31  
32  
33  
34 42. Hillhouse J, Turrisi R, Scaglione NM, Cleveland MJ, Baker K, Florence LC: **A Web-Based Intervention to Reduce Indoor Tanning Motivations in Adolescents: a Randomized Controlled Trial.** *Prevention Science* 2017, **18**(2):131-140.
- 35  
36  
37  
38 43. Hillhouse J, Turrisi R, Cleveland MJ, Scaglione NM, Baker K, Florence LC: **Theory-driven longitudinal study exploring indoor tanning initiation in teens using a person-centered approach.** *Annals of Behavioral Medicine* 2016, **50**(1):48-57.
- 39  
40  
41  
42 44. Baudson TG, Weber KE, Freund PA: **More Than Only Skin Deep: Appearance Self-Concept Predicts Most of Secondary School Students' Self-Esteem.** *Frontiers in psychology* 2016, **7**.
- 43  
44  
45  
46 45. Wichstrøm L, von Soest T: **Reciprocal relations between body satisfaction and self-esteem: A large 13-year prospective study of adolescents.** *Journal of adolescence* 2016, **47**:16-27.
- 47  
48  
49  
50 46. Bränström R, Kasparian NA, Chang Y-m, Affleck P, Tibben A, Aspinwall LG, Azizi E, Baron-Epel O, Battistuzzi L, Bergman W: **Predictors of sun protection behaviors and severe sunburn in an international online study.** *Cancer Epidemiology and Prevention Biomarkers* 2010, **19**(9):2199-2210.
- 51  
52  
53  
54 47. Görig T, Diehl K, Greinert R, Breitbart E, Schneider S: **Prevalence of sun - protective behavior and intentional sun tanning in German adolescents and**
- 55  
56  
57  
58  
59  
60

- 1  
2  
3 **adults: results of a nationwide telephone survey.** *Journal of the European*  
4 *Academy of Dermatology and Venereology* 2017.
- 5 48. Brinker TJ, Seeger W: **Photoaging Mobile Apps: A Novel Opportunity for**  
6 **Smoking Cessation?** *Journal of medical Internet research* 2015, **17(7):**e186.
- 7 49. Brinker TJ, Seeger W, Buslaff F: **Photoaging Mobile Apps in School-Based**  
8 **Tobacco Prevention: The Mirroring Approach.** *J Med Internet Res* 2016,  
9 **18(6):**e183.
- 10 50. Burford O, Jiwa M, Carter O, Parsons R, Hendrie D: **Internet-Based Photoaging**  
11 **Within Australian Pharmacies to Promote Smoking Cessation: Randomized**  
12 **Controlled Trial.** *J Med Internet Res* 2013, **15(3):**e64.
- 13 51. Jiwa M, Burford O, Parsons R: **Preliminary findings of how visual**  
14 **demonstrations of changes to physical appearance may enhance weight**  
15 **loss attempts.** *The European Journal of Public Health* 2015, **25(2):**283-285.
- 16 52. Brinker TJ, Owczarek AD, Seeger W, Groneberg DA, Brieske CM, Jansen P, Klode J,  
17 Stoffels I, Schadendorf D, Izar B: **A Medical Student-Delivered Smoking**  
18 **Prevention Program, Education Against Tobacco, for Secondary Schools in**  
19 **Germany: Randomized Controlled Trial.** *Journal of Medical Internet Research*  
20 2017, **19(6):**e199.
- 21 53. Brinker TJ, Brieske CM, et al.: **A Dermatologists' Ammunition in the War**  
22 **Against Smoking.** *J Med Internet Res* 2017, **forthcoming.**
- 23 54. Williams AL, Grogan S, Clark-Carter D, Buckley E: **Impact of a facial-ageing**  
24 **intervention versus a health literature intervention on women's sun**  
25 **protection attitudes and behavioural intentions.** *Psychology & health* 2013,  
26 **28(9):**993-1008.
- 27 55. Presti LL, Chang P, Taylor MF: **Young Australian adults' reactions to viewing**  
28 **personalised UV photoaged photographs.** *The Australasian medical journal*  
29 2014, **7(11):**454.
- 30 56. Robinson JK, Wayne JD, Martini MC, Hultgren BA, Mallett KA, Turrisi R: **Early**  
31 **detection of new melanomas by patients with melanoma and their partners**  
32 **using a structured skin self-examination skills training intervention: a**  
33 **randomized clinical trial.** *JAMA dermatology* 2016, **152(9):**979-985.
- 34 57. Brinker TJ, Schadendorf D, Klode J, Cosgarea I, Rösch A, Jansen P, Stoffels I, Izar B: **Photoaging Mobile Apps as a Novel Opportunity for Melanoma Prevention: Pilot Study.** *JMIR mHealth and uHealth* 2017, **5(7):**e101.
- 35 58. D'Orazio J, Jarrett S, Amaro-Ortiz A, Scott T: **UV radiation and the skin.** *International journal of molecular sciences* 2013, **14(6):**12222-12248.
- 36 59. Kammeyer A, Luiten R: **Oxidation events and skin aging.** *Ageing research reviews* 2015, **21:**16-29.
- 37 60. Brinker TJ, Brieske CM, Schaefer CM, Buslaff F, Gatzka M, Petri MP, Sondermann  
38 W, Schadendorf D, Stoffels I, Klode J: **Photoaging Mobile Apps in School-Based**  
39 **Melanoma Prevention: Pilot Study.** *Journal of Medical Internet Research* 2017,  
40 **19(9):**e319.
- 41 61. Ajzen I: **Theory of planned behavior.** *Handb Theor Soc Psychol Vol One* 2011,  
42 **1:**438.
- 43 62. Bakos L, Masiero N, Bakos R, Burttet R, Wagner M, Benzano D: **European**  
44 **ancestry and cutaneous melanoma in Southern Brazil.** *Journal of the*  
45 *European Academy of Dermatology and Venereology* 2009, **23(3):**304-307.
- 46 63. Detert H, Hedlund S, Anderson C, Rodvall Y, Festin K, Whiteman D, Falk M: **Validation of sun exposure and protection index (SEPI) for estimation of sun habits.** *Cancer epidemiology* 2015, **39(6):**986-993.



- 1  
2  
3 64. Robine J, Jagger C: **Translation & Linguistic Evaluation protocol & Supporting**  
4 **Material.** *WHO/UNESCAP Project on Health and Disability Statistics* 2003.
- 5 65. Brinker TJ, Holzapfel J, Baudson TG, Sies K, Jakob L, Baumert HM, Heckl M, Cirac A,  
6 Suhre JL, Mathes V: **Photoaging smartphone app promoting poster campaign**  
7 **to reduce smoking prevalence in secondary schools: the Smokerface**  
8 **Randomized Trial: design and baseline characteristics.** *BMJ open* 2016,  
9 6(11):e014288.
- 10 66. Donald A, Donner A: **Adjustments to the Mantel-Haenszel chi - square**  
11 **statistic and odds ratio variance estimator when the data are clustered.**  
12 *Statistics in Medicine* 1987, 6(4):491-499.
- 13 67. Sterne JA, White IR, Carlin JB, Spratt M, Royston P, Kenward MG, Wood AM,  
14 Carpenter JR: **Multiple imputation for missing data in epidemiological and**  
15 **clinical research: potential and pitfalls.** *Bmj* 2009, 338:b2393.
- 16 68. Rat C, Houd S, Gaultier A, Grimault C, Quereux G, Mercier A, Letrilliart L, Dreno B,  
17 Nguyen JM: **General practitioner management related to skin cancer**  
18 **prevention and screening during standard medical encounters: a French**  
19 **cross-sectional study based on the International Classification of Primary**  
20 **Care.** *BMJ open* 2017, 7(1):e013033.  
21  
22  
23  
24

### 25 *Figure Legends*

26  
27 Figure 1: Effect view: 25 years of skin aging with sun protection.

28 Figure 2: Effect view: 5 years of skin aging with sun protection.

29 Figure 3: Effect view: 5 years of weekly tanning without sun protection.

30 Figure 4: Start screen of the app prompts the user to pick his skin type.

31 Figure 5: Maximum effect view: 25 years of UV-damage due to weekly tanning.

32 Figure 6: Explanatory graphic of the effects within the app.

33 Figure 7: Study Design.  
34  
35  
36  
37  
38  
39  
40  
41  
42  
43  
44  
45  
46  
47  
48  
49  
50  
51  
52  
53  
54  
55  
56  
57  
58  
59  
60

1  
2  
3  
4  
5  
6  
7  
8  
9  
10  
11  
12  
13  
14  
15  
16  
17  
18  
19  
20  
21  
22  
23  
24  
25  
26  
27  
28  
29  
30  
31  
32  
33  
34  
35  
36  
37  
38  
39  
40  
41  
42  
43  
44  
45  
46  
47  
48  
49  
50  
51  
52  
53  
54  
55  
56  
57  
58  
59  
60

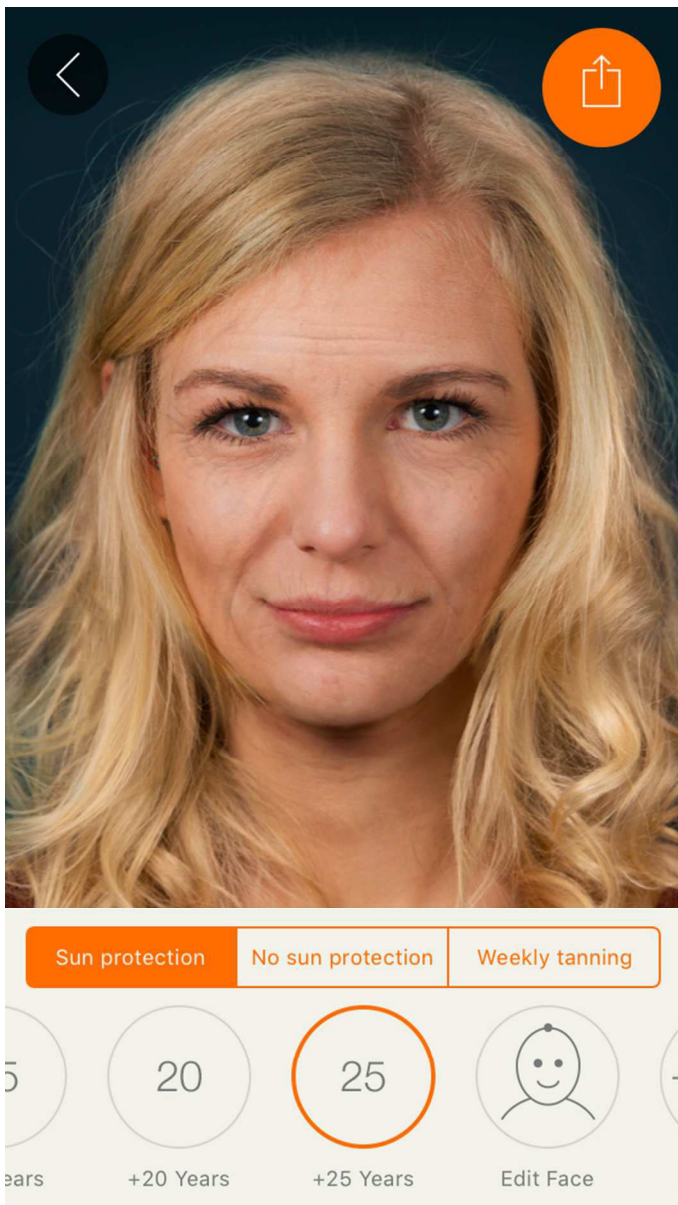

Figure 1: Effect view: 25 years of skin aging with sun protection.

54x96mm (300 x 300 DPI)

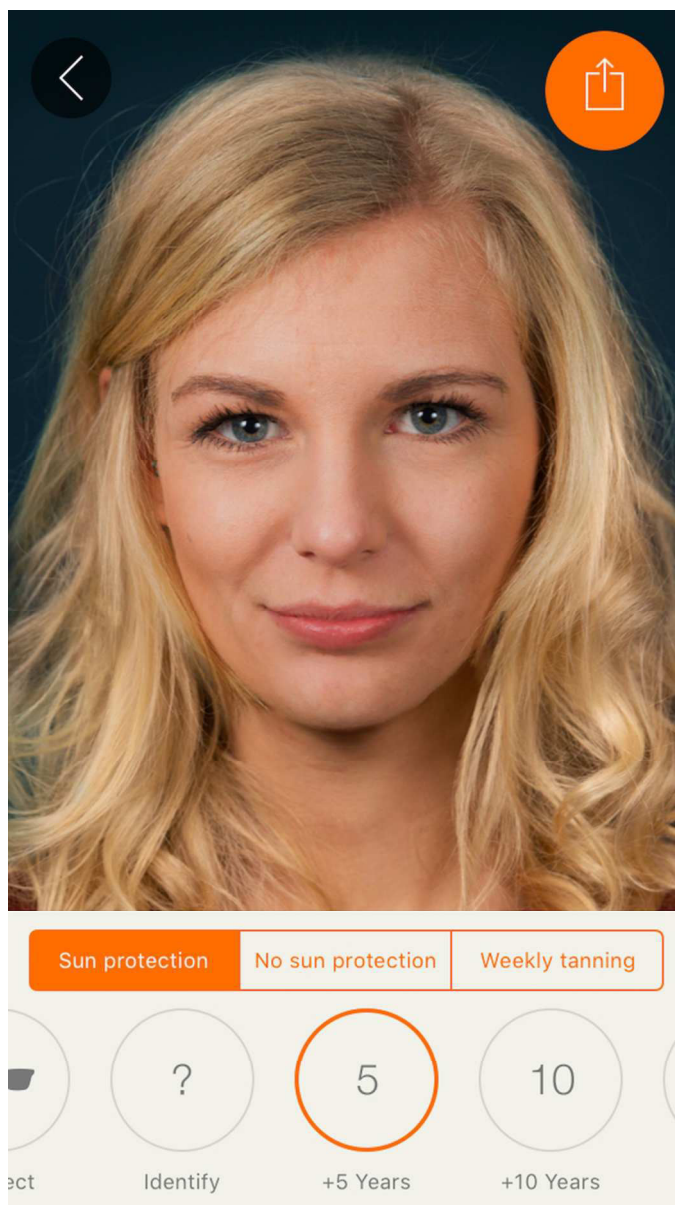

Figure 2: Effect view: 5 years of skin aging with sun protection.

67x120mm (300 x 300 DPI)



1  
2  
3  
4  
5  
6  
7  
8  
9  
10  
11  
12  
13  
14  
15  
16  
17  
18  
19  
20  
21  
22  
23  
24  
25  
26  
27  
28  
29  
30  
31  
32  
33  
34  
35  
36  
37  
38  
39  
40  
41  
42  
43  
44  
45  
46  
47  
48  
49  
50  
51  
52  
53  
54  
55  
56  
57  
58  
59  
60

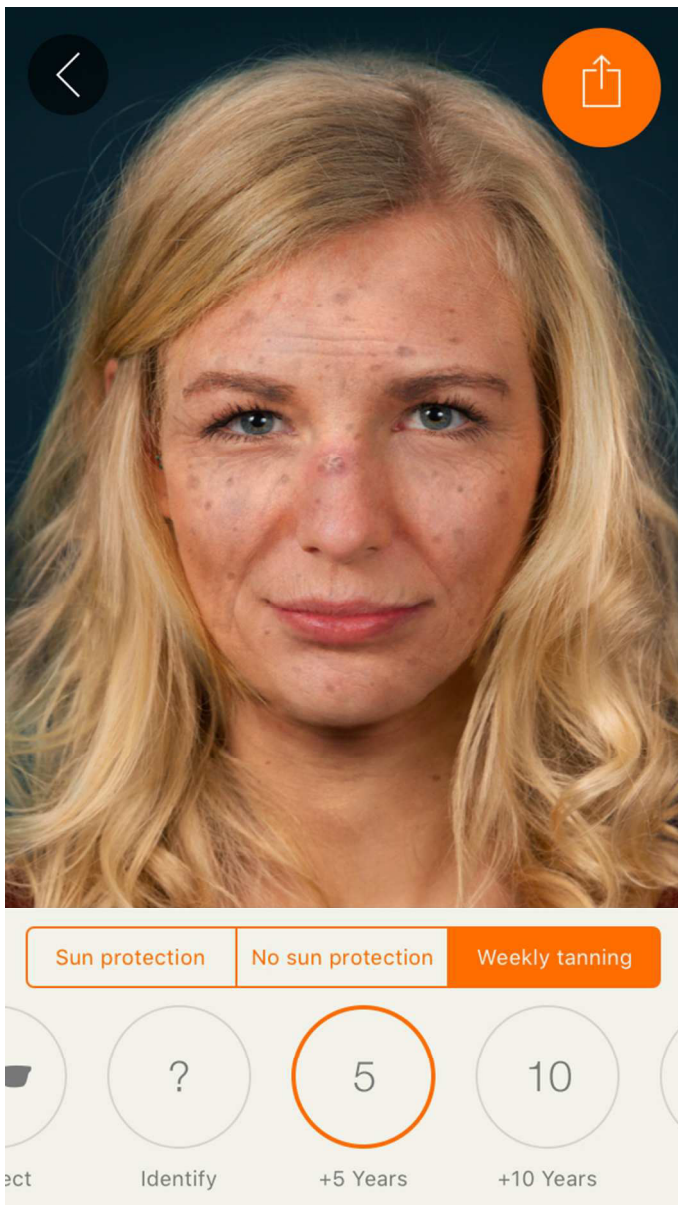

Figure 3: Effect view: 5 years of weekly tanning without sun protection.

54x96mm (300 x 300 DPI)

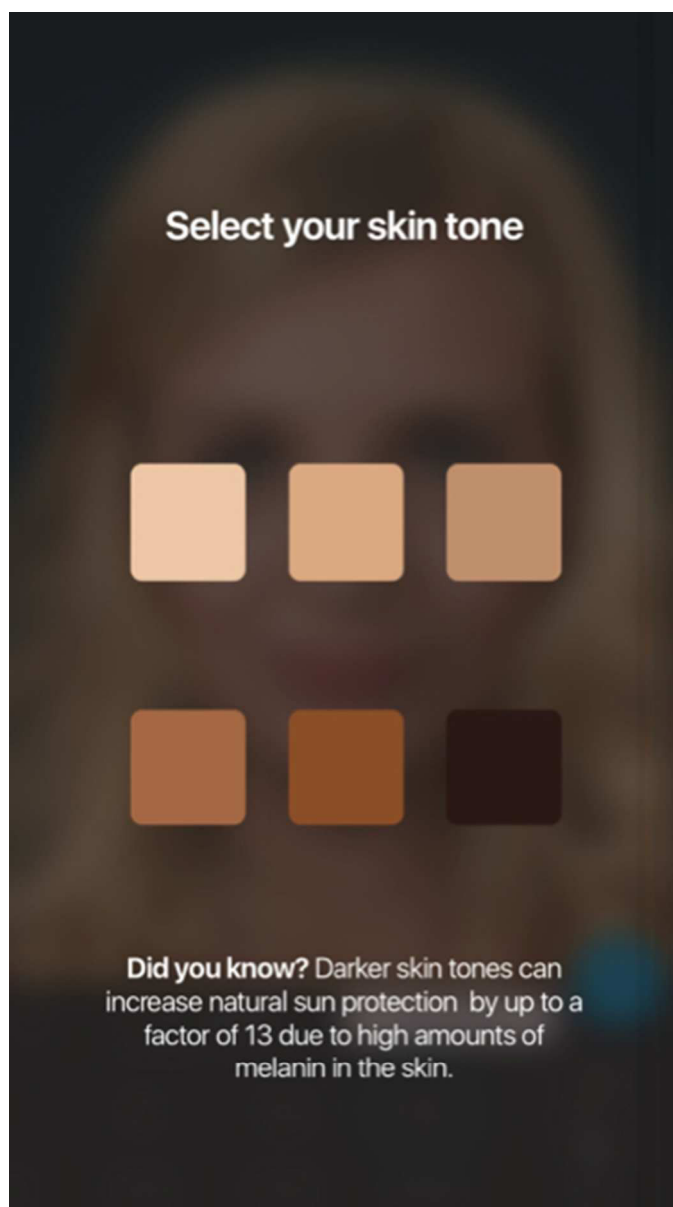

45 Figure 4: Start screen of the app prompts the user to pick his skin type.

46  
47 30x54mm (300 x 300 DPI)

1  
2  
3  
4  
5  
6  
7  
8  
9  
10  
11  
12  
13  
14  
15  
16  
17  
18  
19  
20  
21  
22  
23  
24  
25  
26  
27  
28  
29  
30  
31  
32  
33  
34  
35  
36  
37  
38  
39  
40  
41  
42  
43  
44  
45  
46  
47  
48  
49  
50  
51  
52  
53  
54  
55  
56  
57  
58  
59  
60

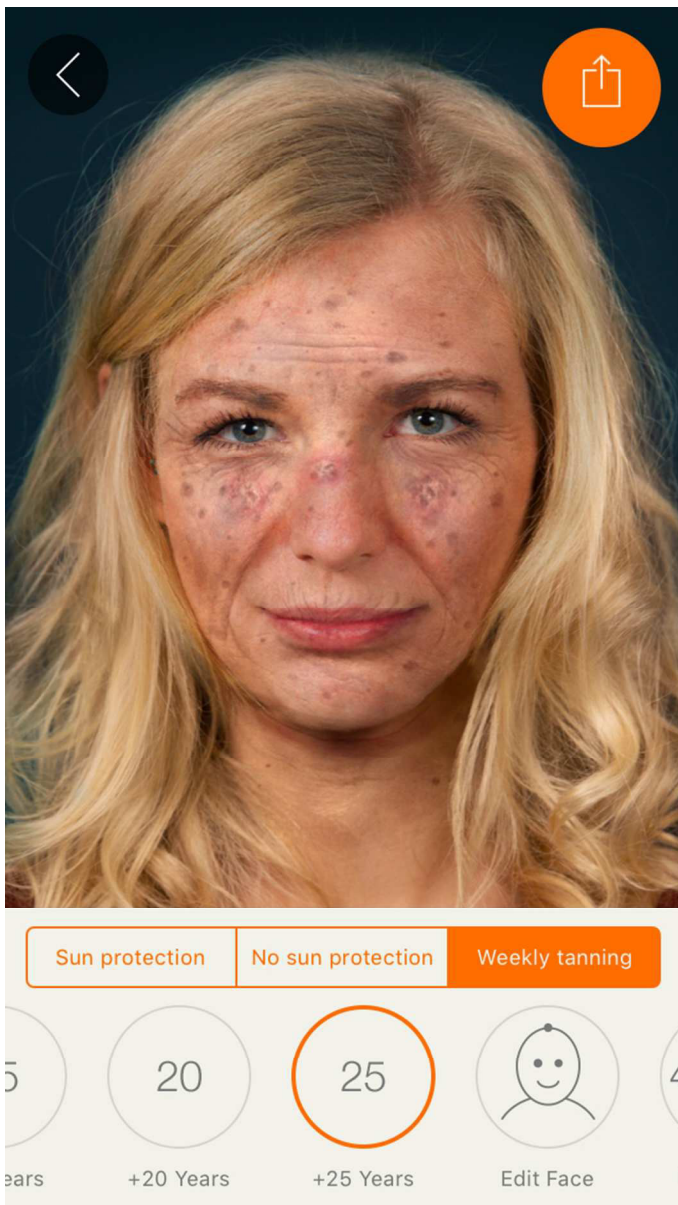

Maximum effect view: 25 years of UV-damage due to weekly tanning.

54x96mm (300 x 300 DPI)

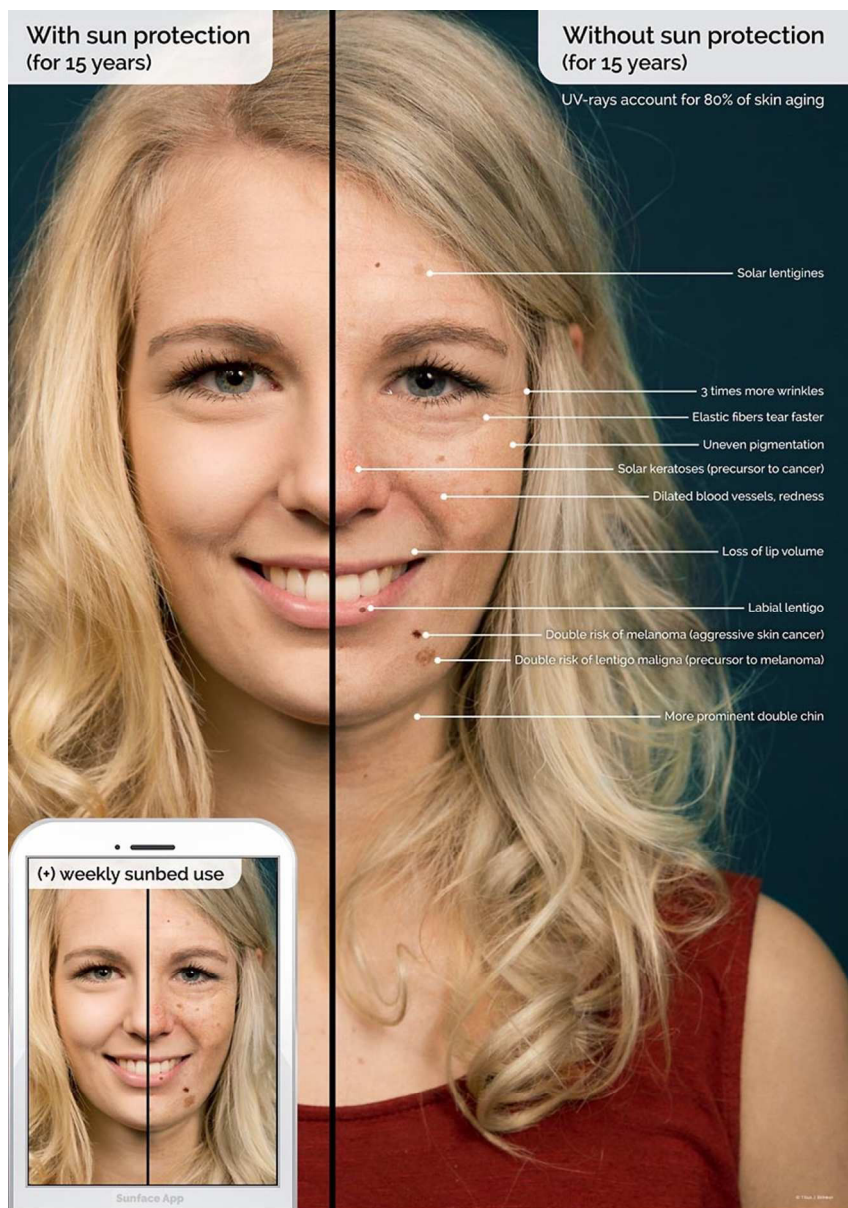

Figure 6: Explanatory graphic of the effects within the app.

71x101mm (300 x 300 DPI)

1  
2  
3  
4  
5  
6  
7  
8  
9  
10  
11  
12  
13  
14  
15  
16  
17  
18  
19  
20  
21  
22  
23  
24  
25  
26  
27  
28  
29  
30  
31  
32  
33  
34  
35  
36  
37  
38  
39  
40  
41  
42  
43  
44  
45  
46  
47  
48  
49  
50  
51  
52  
53  
54  
55  
56  
57  
58  
59  
60

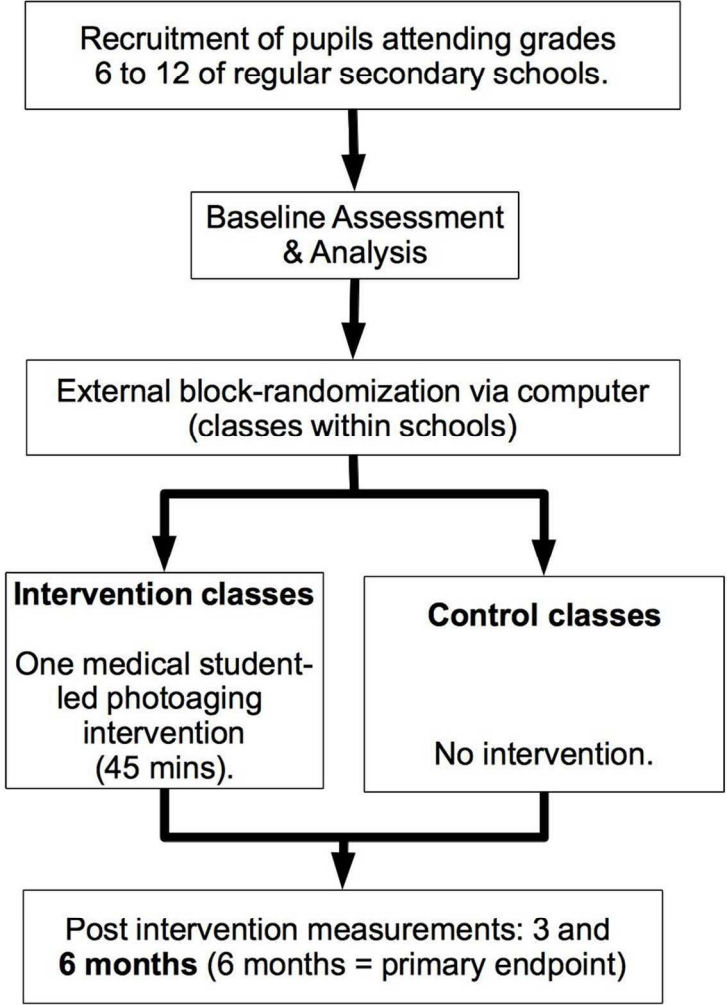

**Figure 6**  
**Study design.**

Figure 7: Study Design.

88x125mm (300 x 300 DPI)
